# Supplementary material for: Multiple risk factor control, mortality and cardiovascular events in type 2 diabetes and chronic kidney disease: a population-based cohort study
Source: PubMed Central journal article supplement (PMC5942470; doi:10.1136/bmjopen-2017-019950), 2018-05-08

## SUPPLEMENTARY MATERIAL

**Figure S1.** Study cohort selection

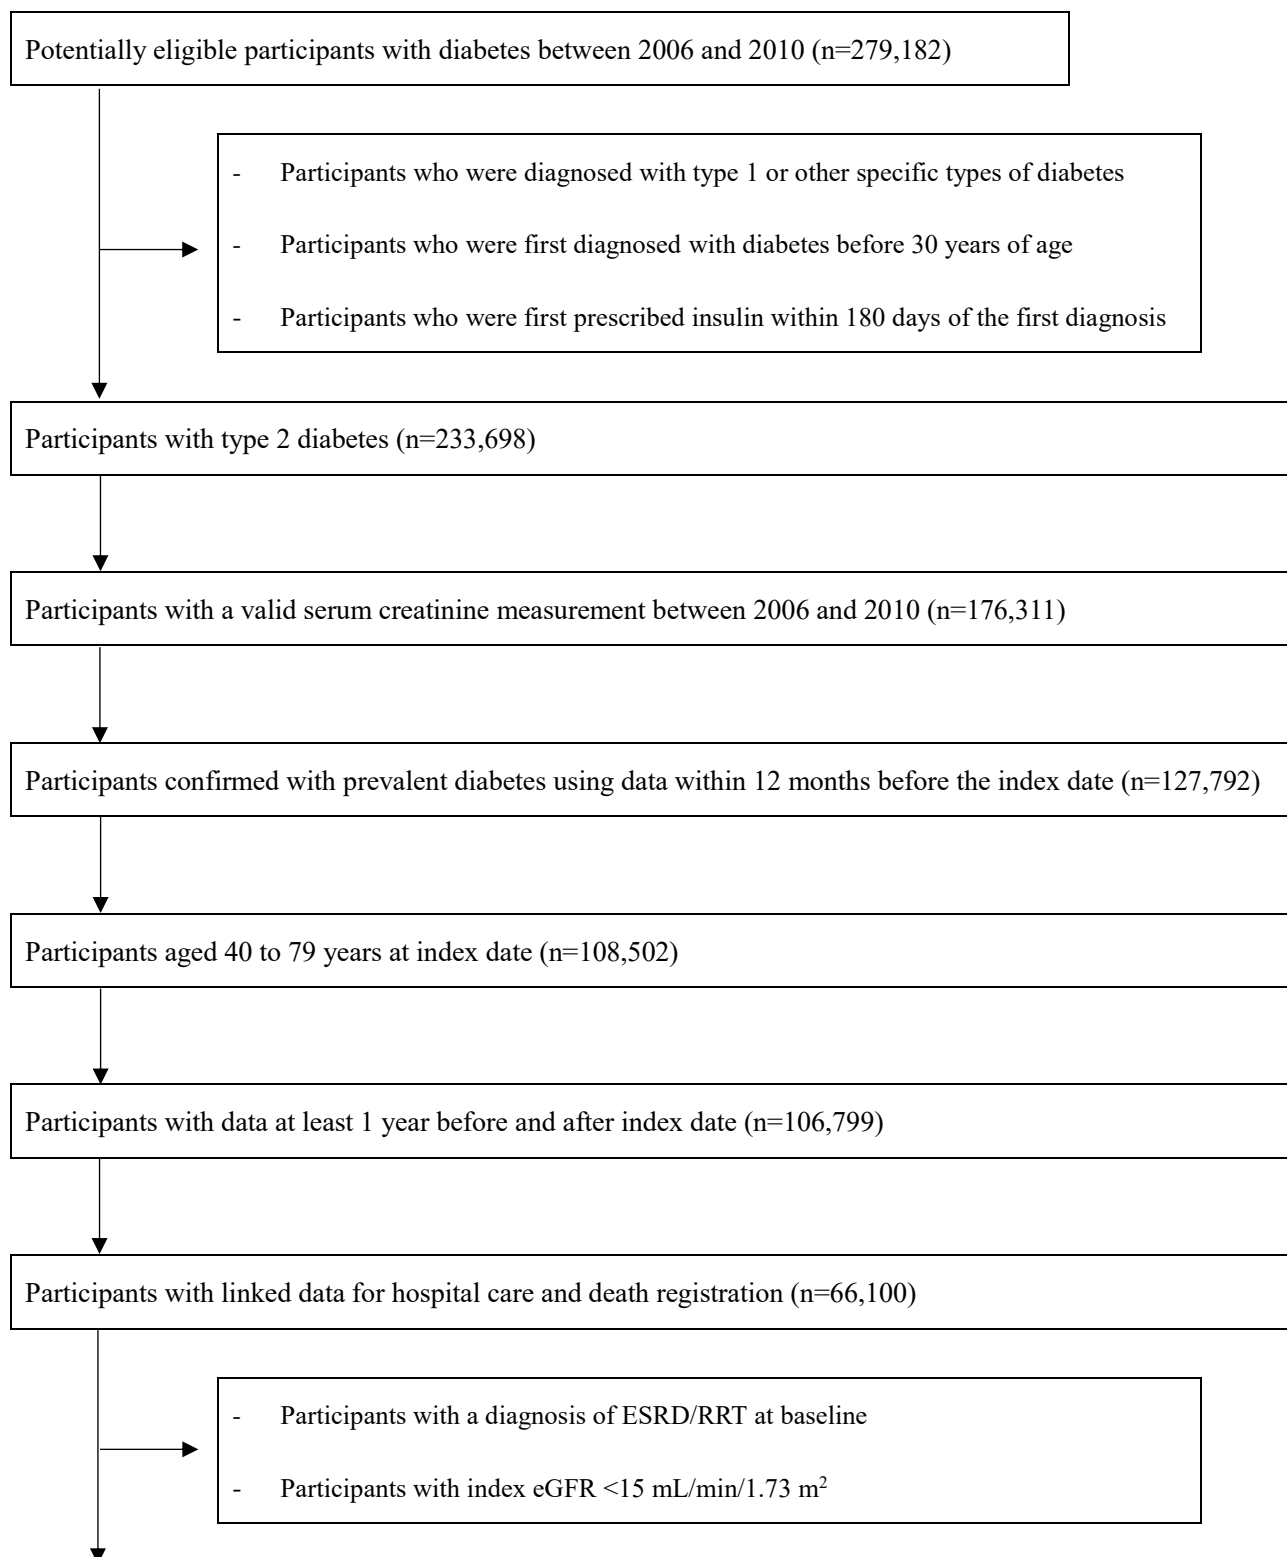

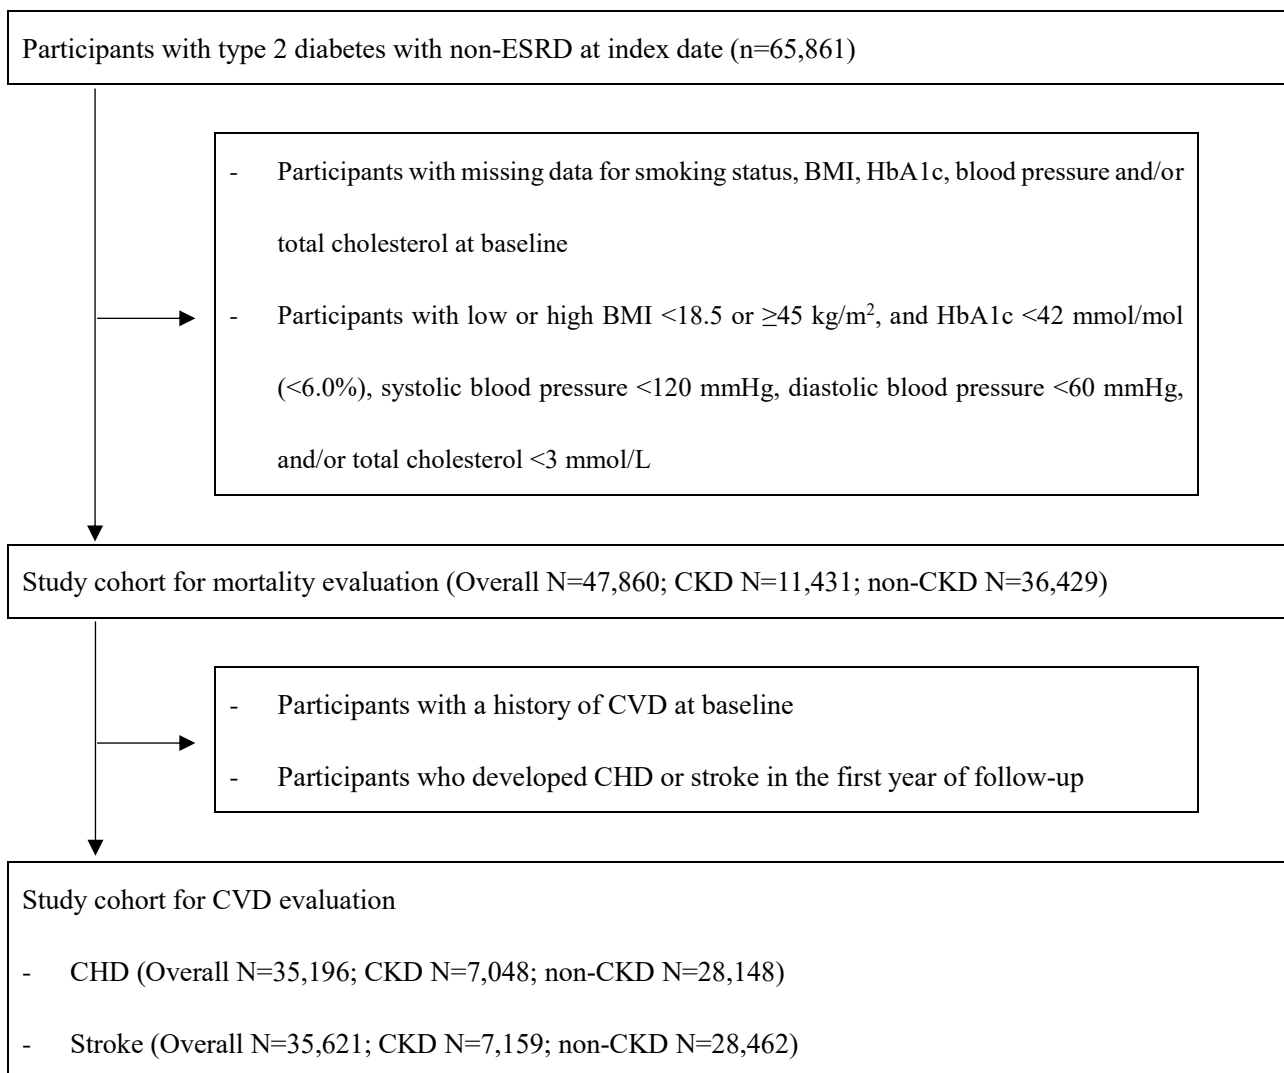

BMI, body mass index; CKD, chronic kidney disease; CHD, coronary heart disease; CVD, Cardiovascular diseases; eGFR, estimated glomerular filtration rate; ESRD, end-stage renal disease; RRT, renal replacement therapy

**Table S1.** Breakdown of risk factors controlled according to chronic kidney disease and a history of cardiovascular diseases

| Number of risk factors controlled | HbA1c <53 mmol/mol (<7.0%) | Blood pressure <140/90 mmHg | Total cholesterol <5 mmol/L | No smoking | CKD (N=11,431)     |                  |               | Non-CKD (N=36,429) |                   |               |
|-----------------------------------|----------------------------|-----------------------------|-----------------------------|------------|--------------------|------------------|---------------|--------------------|-------------------|---------------|
|                                   |                            |                             |                             |            | Overall (N=11,431) | No CVD (N=7,216) | CVD (N=4,215) | Overall (N=36,429) | No CVD (N=28,569) | CVD (N=7,860) |
| 0                                 | –                          | –                           | –                           | –          | 138 (1)            | 87 (1)           | 51 (1)        | 806 (2)            | 678 (2)           | 128 (2)       |
| 1                                 | Y                          | –                           | –                           | –          | 69 (0.6)           | 46 (0.6)         | 23 (0.6)      | 312 (1)            | 260 (0.9)         | 52 (0.7)      |
|                                   | –                          | Y                           | –                           | –          | 89 (0.8)           | 64 (0.9)         | 25 (0.6)      | 759 (2)            | 624 (2)           | 135 (2)       |
|                                   | –                          | –                           | Y                           | –          | 438 (4)            | 264 (4)          | 174 (4)       | 1,742 (5)          | 1,350 (5)         | 392 (5)       |
|                                   | –                          | –                           | –                           | Y          | 831 (7)            | 597 (8)          | 234 (6)       | 2,559 (7)          | 2,187 (8)         | 372 (5)       |
|                                   | Y                          | Y                           | –                           | –          | 62 (0.5)           | 43 (0.6)         | 19 (0.5)      | 304 (0.8)          | 268 (0.9)         | 36 (0.5)      |
| 2                                 | Y                          | –                           | Y                           | –          | 245 (2)            | 152 (2)          | 93 (2)        | 794 (2)            | 590 (2)           | 204 (3)       |
|                                   | Y                          | –                           | –                           | Y          | 407 (4)            | 289 (4)          | 118 (3)       | 1,070 (3)          | 911 (3)           | 159 (2)       |
|                                   | –                          | Y                           | Y                           | –          | 390 (3)            | 215 (3)          | 175 (4)       | 1,911 (5)          | 1,446 (5)         | 465 (6)       |
|                                   | –                          | Y                           | –                           | Y          | 531 (5)            | 379 (5)          | 152 (4)       | 2,205 (6)          | 1,910 (7)         | 295 (4)       |
|                                   | –                          | –                           | Y                           | Y          | 2,527 (22)         | 1,615 (22)       | 912 (22)      | 7,004 (19)         | 5,477 (19)        | 1,527 (19)    |
| 3                                 | Y                          | Y                           | Y                           | –          | 247 (2)            | 152 (2)          | 95 (2)        | 1,073 (3)          | 788 (3)           | 285 (4)       |
|                                   | Y                          | Y                           | –                           | Y          | 302 (3)            | 199 (3)          | 103 (2)       | 1,067 (3)          | 905 (3)           | 162 (2)       |
|                                   | Y                          | –                           | Y                           | Y          | 1,552 (14)         | 1,019 (14)       | 533 (13)      | 3,487 (10)         | 2,678 (9)         | 809 (10)      |
|                                   | –                          | Y                           | Y                           | Y          | 2,139 (19)         | 1,228 (17)       | 911 (22)      | 7,030 (19)         | 5,294 (19)        | 1,736 (22)    |
| 4                                 | Y                          | Y                           | Y                           | Y          | 1,464 (13)         | 867 (12)         | 597 (14)      | 4,306 (12)         | 3,203 (11)        | 1,103 (14)    |

Y, meeting the criterion; –, not meeting the criterion

CKD, chronic kidney disease; CVD, (a history of) cardiovascular diseases

**Figure S2.** Relative hazards of individual risk factors controlled for mortality and cardiovascular events in (a) participants with chronic kidney disease (CKD) and (b) participants with non-CKD. Hazard ratios (HRs) for all-cause mortality and subdistribution hazard ratios (SHRs) for cardiovascular mortality, coronary heart disease, and stroke were adjusted for age, gender, CKD stage (for CKD cohort), body mass index, deprivation level, duration of diabetes, proteinuria status, a history of cardiovascular diseases (for mortality evaluation), prescribing of antidiabetic, antihypertensive, statins and antiplatelet drugs, and index year.

**(a) CKD**

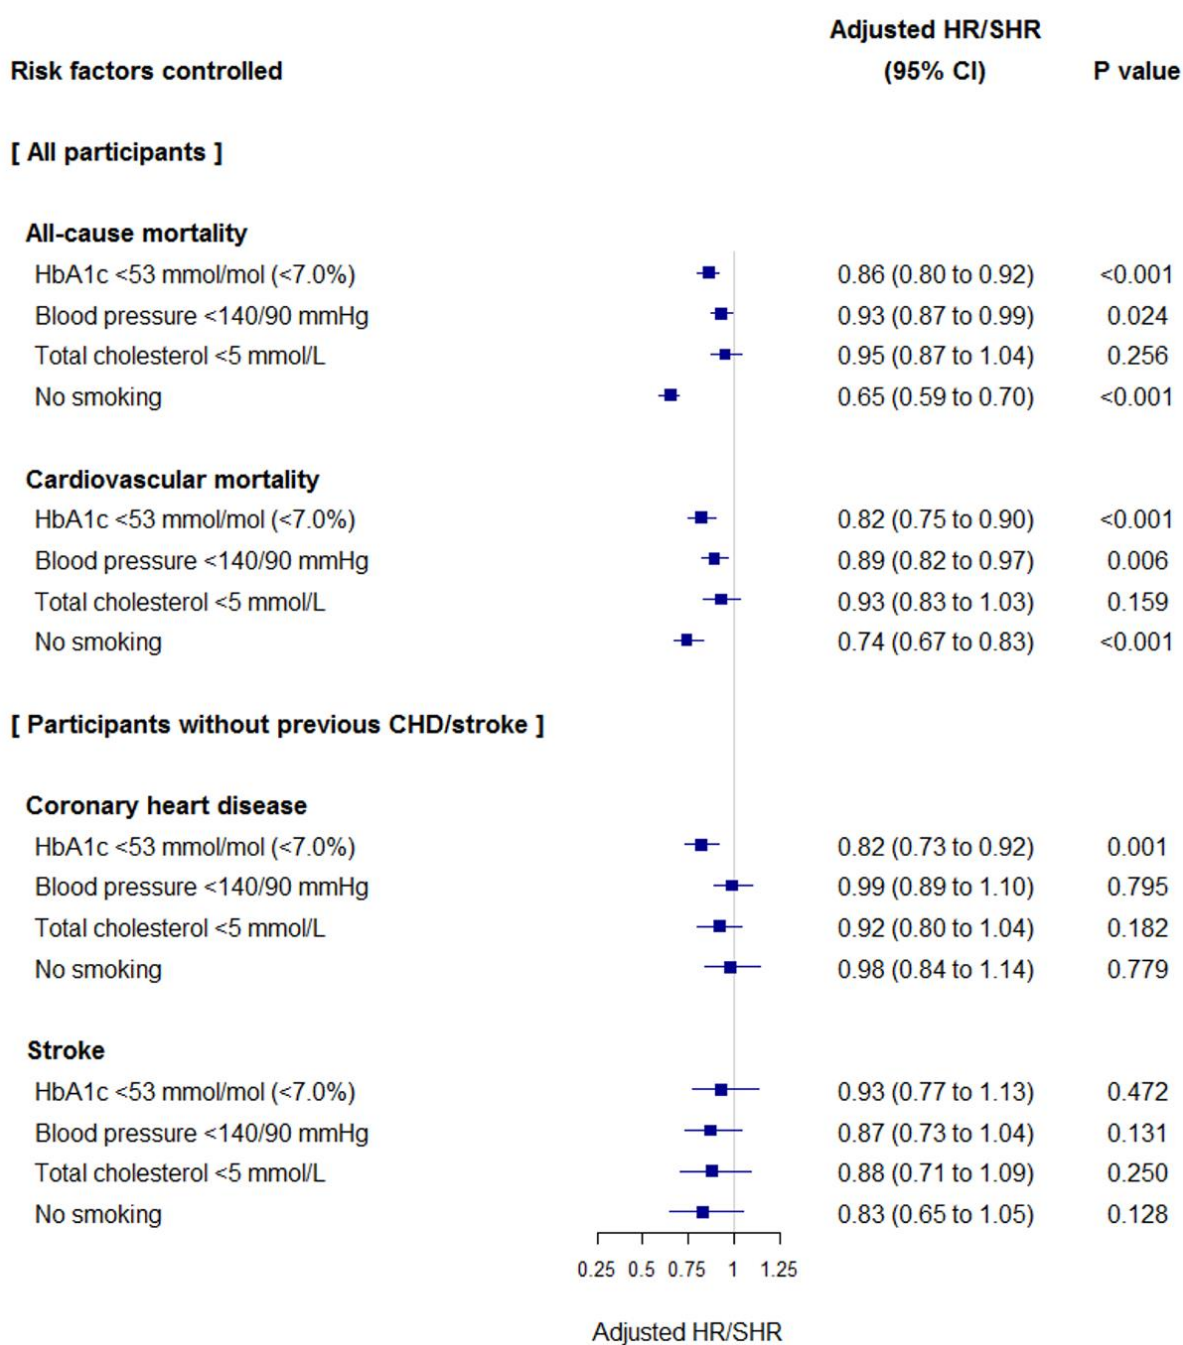

**(b) Non-CKD**

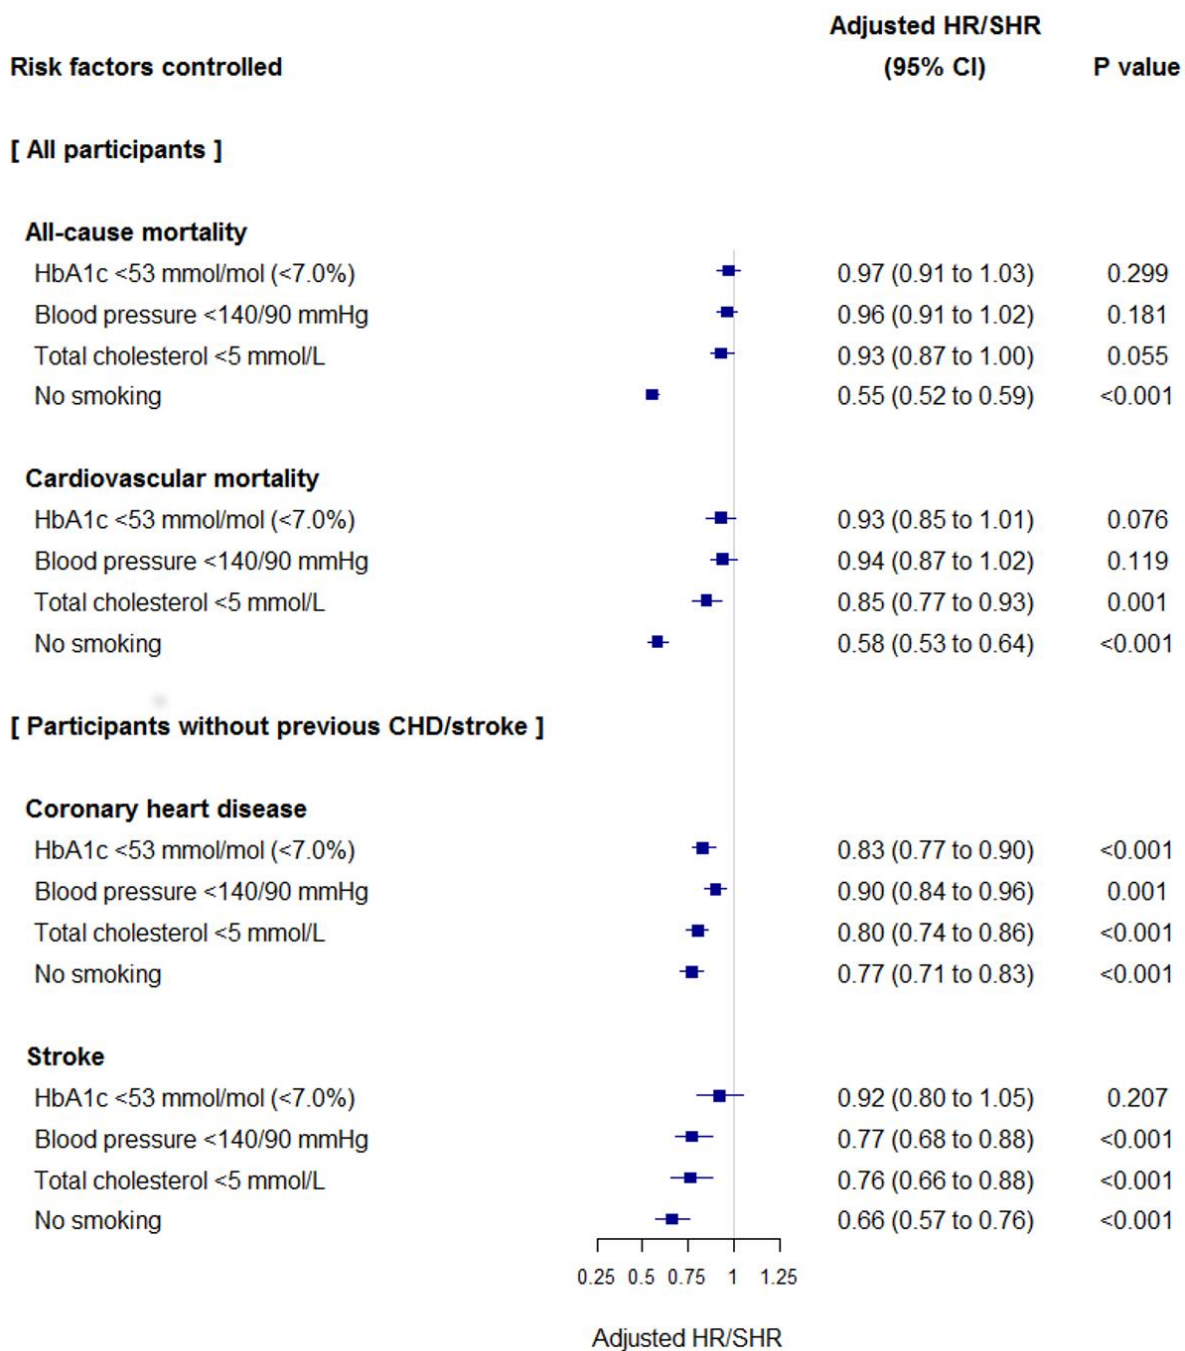

Supplement: bmjopen-2017-019950supp001.pdf [file bmjopen-2017-019950supp001.pdf]
