# Supplementary material for: Multiple risk factor control, mortality and cardiovascular events in type 2 diabetes and chronic kidney disease: a population-based cohort study
Source: PubMed Central journal article supplement (PMC5942470; doi:10.1136/bmjopen-2017-019950), 2018-05-08
Supplement: bmjopen-2017-019950.draft_revisions.pdf [file bmjopen-2017-019950.draft_revisions.pdf]

# BMJ Open

BMJ Open is committed to open peer review. As part of this commitment we make the peer review history of every article we publish publicly available.

When an article is published we post the peer reviewers' comments and the authors' responses online. We also post the versions of the paper that were used during peer review. These are the versions that the peer review comments apply to.

The versions of the paper that follow are the versions that were submitted during the peer review process. They are not the versions of record or the final published versions. They should not be cited or distributed as the published version of this manuscript.

BMJ Open is an open access journal and the full, final, typeset and author-corrected version of record of the manuscript is available on our site with no access controls, subscription charges or pay-per-view fees (<http://bmjopen.bmj.com>).

If you have any questions on BMJ Open's open peer review process please email [info.bmjopen@bmj.com](mailto:info.bmjopen@bmj.com)

# BMJ Open

## Multiple risk factor control, mortality and cardiovascular events in type 2 diabetes and chronic kidney disease: a population-based cohort study

|                                 |                                                                                                                                |
|---------------------------------|--------------------------------------------------------------------------------------------------------------------------------|
| Journal:                        | <i>BMJ Open</i>                                                                                                                |
| Manuscript ID                   | bmjopen-2017-019950                                                                                                            |
| Article Type:                   | Research                                                                                                                       |
| Date Submitted by the Author:   | 04-Oct-2017                                                                                                                    |
| Complete List of Authors:       | Hamada, Shota; Institute for Health Economics and Policy, Research Department<br>Gulliford, Martin; King's College London, UK, |
| <b>Primary Subject Heading</b>: | Diabetes and endocrinology                                                                                                     |
| Secondary Subject Heading:      | General practice / Family practice                                                                                             |
| Keywords:                       | cardiovascular diseases, chronic kidney disease, mortality, type 2 diabetes                                                    |
|                                 |                                                                                                                                |

SCHOLARONE™  
Manuscripts

Peer Review Only

1  
2  
3  
4  
5  
6 **Multiple risk factor control, mortality and cardiovascular events in type 2 diabetes**  
7  
8  
9 **and chronic kidney disease: a population-based cohort study**  
10

11  
12  
13  
14 Shota Hamada<sup>1,2</sup>, Martin C Gulliford<sup>1,3</sup>  
15

16  
17 1 Department of Primary Care and Public Health Sciences, King's College London, London, UK  
18

19  
20 2 Research Department, Institute for Health Economics and Policy, Association for Health  
21  
22 Economics Research and Social Insurance and Welfare, Tokyo, Japan  
23

24  
25 3 National Institute for Health Research Biomedical Research Centre at Guy's and St Thomas'  
26  
27 National Health Service Foundation Trust, London UK  
28  
29

30  
31  
32  
33  
34 Correspondence to: Shota Hamada  
35

36  
37 Research Department, Institute for Health Economics and Policy, Association for Health  
38

39  
40 Economics Research and Social Insurance and Welfare  
41

42  
43 No.11 Toyo-kaiji Bldg, 1-5-11, Nishi-Shinbashi, Minato-ku, Tokyo, 105-0003 Japan  
44

45  
46 Tel: +81 3-3506-8529, Fax: +81 3-3506-8528, E-mail: [shota.hamada@ihp.jp](mailto:shota.hamada@ihp.jp)  
47  
48  
49  
50  
51  
52  
53  
54  
55  
56

## Abstract

**OBJECTIVES:** This study aimed to evaluate the effectiveness of multiple risk factor control (MRFC) at reducing mortality and cardiovascular events in diabetes and chronic kidney disease (CKD) in clinical practice.

**DESIGN:** Population-based cohort study.

**SETTING:** Primary care database in the UK, linked with inpatient and mortality data.

**PARTICIPANTS:** Participants aged 40 to 79 years with type 2 diabetes and valid serum creatinine measurements, including 11,431 participants with CKD (eGFR 15–59 mL/min/1.73 m<sup>2</sup>) and 36,429 participants with non-CKD (eGFR ≥60 mL/min/1.73 m<sup>2</sup>).

**EXPOSURES:** MRFC consisted of four components: HbA1c <53 mmol/mol (<7.0%), blood pressure <140/90 mmHg, total cholesterol <5 mmol/L and no smoking. The main exposure variable was the number of risk factors controlled at the same time at baseline.

**OUTCOME MEASURES:** All-cause and cardiovascular mortality in the overall participants. Cardiovascular events, including coronary heart disease and stroke, in participants limited to those without a history of cardiovascular diseases at baseline (CKD N=7,216; non-CKD N=28,569).

**RESULTS:** In participants with CKD, 37% or 13% met three or four MRFC criteria, respectively. Increasing MRFC was associated with lower relative hazards for all

1  
2  
3  
4  
5  
6 outcomes studied compared with those meeting no or one criterion. For participants  
7  
8 with CKD meeting four criteria, the adjusted hazard ratio (HR) for all-cause mortality  
9  
10 was 0.59 (95% confidence interval (CI) 0.52 to 0.67) and the adjusted subdistribution  
11  
12 HR for cardiovascular mortality was 0.58 (0.49 to 0.69), considering a competing risk  
13  
14 of non-cardiovascular death. Participants meeting four criteria also had lower relative  
15  
16 hazards for coronary heart disease (adjusted subdistribution HR 0.73, 95% CI 0.59 to  
17  
18 0.91) and stroke (0.61, 0.43 to 0.86), considering death as a competing risk.  
19  
20  
21  
22  
23  
24

25 **CONCLUSIONS:** MRFC may attenuate the increased risks for mortality and  
26  
27 cardiovascular events in people with diabetes and CKD. The implementation of MRFC  
28  
29 is suboptimal and should be ensured in this high-risk population.  
30  
31  
32  
33  
34  
35  
36

### 37 **Strengths and limitations of this study**

- 38  
39 • This study included >11,000 participants with type 2 diabetes and CKD sampled  
40  
41 from a representative general population with about 6 years of follow-up, which  
42  
43 enabled to determine the associations of cardiovascular risk factors with mortality  
44  
45 and cardiovascular events.  
46  
47
- 48  
49 • Linked data for hospital care and death registration with a primary care database  
50  
51 enhanced the validity of the study to evaluate mortality and cardiovascular events.  
52  
53  
54  
55  
56

- 1  
2  
3  
4  
5  
6 • We could not determine the causal relationships between MRFC and mortality and  
7  
8 cardiovascular events from this non-randomised study.  
9  
10  
11 • There is a possibility of confounding by indication; thus, healthier participants were  
12  
13 managed more successfully and resulted in being categorised as those with greater  
14  
15 number of risk factors controlled.  
16  
17  
18  
19  
20  
21  
22  
23  
24  
25  
26  
27  
28  
29  
30  
31  
32  
33  
34  
35  
36  
37  
38  
39  
40  
41  
42  
43  
44  
45  
46  
47  
48  
49  
50  
51  
52  
53  
54  
55  
56  
57  
58  
59  
60
- For peer review only

## Introduction

Diabetes and chronic kidney disease (CKD) are growing health problems worldwide, contributing to increased mortality [1]. Diabetes and CKD also impose a substantial economic burden on society, with particularly high costs relating to cardiovascular complications and renal replacement therapy [2,3]. The prevalence of CKD in patients with diabetes is between 4.2% and 17.9% (CKD stages 3 to 5) in European countries [4]. The leading cause of death in people with type 2 diabetes or CKD is cardiovascular disease rather than renal complications [5,6]. Prevention of cardiovascular events is a key focus in the management of patients with these conditions.

Recent epidemiological studies have demonstrated additional risks of CKD on mortality and cardiovascular diseases in people with diabetes [7], but treatment approaches in this population have not been well studied. Multifactorial interventions to reduce cardiovascular risks were shown to be effective at reducing mortality and cardiovascular events in patients with type 2 diabetes and persistent microalbuminuria in the Steno-2 randomised trial [8,9]. This study provided a high level of evidence, but included a relatively small number of participants with diabetes who were managed in specialist centres. Recently, the implementation and effectiveness of this approach have been

1  
2  
3  
4  
5  
6 evaluated in patients with diabetes in clinical practice settings [10-12]. However, no  
7  
8  
9 studies focused on multiple risk factor control (MRFC) in patients with both diabetes  
10  
11 and CKD in a wide clinical practice setting. Generally, patients with kidney disease  
12  
13  
14 have been underrepresented in cardiovascular clinical trials [13]. This population may  
15  
16  
17 have an altered risk-benefit profile, and extrapolation of data based on patients with  
18  
19  
20 normal kidney function into patients with CKD may be unreliable [13]. We aimed to  
21  
22  
23 conduct a pragmatic evaluation of the effectiveness of MRFC on mortality and  
24  
25  
26 cardiovascular events in participants with type 2 diabetes and CKD in a  
27  
28  
29 population-based cohort study.  
30  
31  
32  
33

## 34 **Methods**

### 35 *Data sources*

36  
37 This study employed a linked dataset derived from the UK Clinical Practice Research  
38  
39  
40 Datalink (CPRD), the UK National Health Service Hospital Episodes Statistics (HES)  
41  
42  
43 inpatient data, and the UK Office for National Statistics (ONS) mortality data. The  
44  
45  
46 CPRD contains anonymised electronic health records from general practices across the  
47  
48  
49 UK [14]. The CPRD collects data for diagnoses and clinical assessment, prescriptions  
50  
51  
52 and laboratory test results, such as HbA1c and serum creatinine. The HES inpatient data  
53  
54  
55  
56  
57  
58  
59  
60



1  
2  
3  
4  
5  
6 were comprised of inpatient records from all National Health Service hospitals in  
7  
8  
9 England. Information on the date of death and the causes of death were available in the  
10  
11 ONS mortality data file. Diagnoses and clinical evaluation in the CPRD were coded  
12  
13  
14 with the Read codes, a hierarchical coding system used in primary care in the UK,  
15  
16  
17 whereas those in the HES and ONS were coded with the International Classification of  
18  
19  
20 Diseases, tenth revision (ICD-10). Linked data are available for general practices in  
21  
22  
23 England only and participants were limited to those with linked data for the HES and  
24  
25  
26 ONS available. The study was approved by the CPRD Independent Scientific Advisory  
27  
28  
29 Committee (ISAC Protocol 15\_201R).

### 30 31 32 33 34 *Study population*

35  
36  
37 The scheme of the study cohort selection is presented in figure S1. We initially sampled  
38  
39  
40 participants who were diagnosed with type 2 diabetes from the CPRD [15]. Using the  
41  
42  
43 CPRD records, the date of the first valid serum creatinine value between 2006 and 2010  
44  
45  
46 recorded more than one year after the first diagnosis of diabetes were defined as the  
47  
48  
49 index date. A similar approach was taken by Adamsson Eryd et al [16] to ensure that  
50  
51  
52 participants managed for diabetes had sufficient time available for recording of baseline  
53  
54  
55 values. To avoid misclassification of CKD status and stage, the index serum creatinine  
56  
57  
58  
59  
60

1  
2  
3  
4  
5  
6 values were validated by confirmation of subsequent values within 30% of the index  
7  
8 values. We restricted the sample to participants aged 40 to 79 years at the index date  
9  
10 with at least one year of follow-up data available (ie, participants who died in the first  
11  
12 year of follow-up were excluded). Estimated glomerular filtration rate (eGFR) was  
13  
14 calculated from a serum creatinine value, age, gender, and ethnicity, using the Chronic  
15  
16 Kidney Disease Epidemiology Collaboration (CKD-EPI) equation [17]. Missing  
17  
18 ethnicity was assumed as 'non-black' in the present study. Participants diagnosed with  
19  
20 end-stage renal disease, those who had received renal replacement therapy, or those with  
21  
22 index eGFR  $<15$  mL/min/1.73 m<sup>2</sup> were excluded. We also excluded participants with  
23  
24 missing data for smoking status, body mass index (BMI), HbA1c, blood pressure, total  
25  
26 cholesterol or with extreme BMI ( $<18.5$  or  $\geq 45$  kg/m<sup>2</sup>) at baseline. Since it has been  
27  
28 reported that low values of cardiovascular risk factors were not always associated with  
29  
30 better outcomes in observational studies [15,18,19], possibly due to reverse causation  
31  
32 [20,21], participants with low HbA1c ( $<42$  mmol/mol or  $<6.0\%$ ), blood pressure  
33  
34 (systolic  $<120$  or diastolic  $<60$  mmHg) and total cholesterol ( $<3$  mmol/L) were further  
35  
36 excluded. Participants were categorised according to index eGFR into those with CKD  
37  
38 ( $<60$  mL/min/1.73 m<sup>2</sup>) and non-CKD ( $\geq 60$  mL/min/1.73 m<sup>2</sup>).  
39  
40  
41  
42  
43  
44  
45  
46  
47  
48  
49  
50  
51  
52  
53  
54  
55  
56  
57  
58  
59  
60

### *Multiple risk factor control*

MRFC was defined in this study as consisting of four components: (1) HbA1c <53 mmol/mol (<7.0%), (2) blood pressure <140/90 mmHg (systolic <140 and diastolic <90 mmHg), (3) total cholesterol <5 mmol/L and (4) no smoking (non- or ex-smokers). The means of HbA1c, blood pressure, and total cholesterol records within one year before the index date were evaluated. The number of the risk factors controlled from four criteria was treated as the exposure and included as a categorical variable in the analyses, with those meeting no or one criterion as a reference category.

### *Outcomes*

Main outcomes of interest in this study included all-cause and cardiovascular mortality, fatal and non-fatal coronary heart disease (CHD) and stroke. The date of death and causes of death were determined using the ONS mortality data. Patients who died from cardiovascular causes were identified if people had any of the ICD-10 codes I00 to I99 as a cause of death. All of the CPRD, HES and ONS were used to ascertain fatal and non-fatal CHD and stroke. Read codes for CHD and stroke reported previously [22,23] were updated for the present study. The ICD-10 codes for CHD and stroke were I20 to I25 and I60, I61, I63 and I64, respectively.

### *Analysis*

Baseline characteristics of the study cohort were described according to CKD status.

Time-to-event analyses were conducted to evaluate the associations of MRFC with mortality and cardiovascular events. To address the issue of reverse causation and to avoid misclassification of the outcomes from those which had existed at baseline, person-years for participants who experienced outcomes of interest in the first year of follow-up were excluded from analyses. Cox proportional hazards models were used to evaluate the association of MRFC with all-cause mortality. Proportional hazards assumption was assessed by visual inspection of log-log plots, and no apparent violation was found. Competing risks regression with subdistribution hazard models were conducted for cardiovascular mortality and cardiovascular events, considering competing risks for non-cardiovascular and all-cause death, respectively [24].

Associations of MRFC with cardiovascular events were evaluated in participants without a known history of cardiovascular diseases at baseline. Participants were followed from the index date until the earliest of the events of interest, the last date of CPRD records, or 31 March 2015 for all-cause mortality evaluation. In the competing risks regression analyses for cardiovascular mortality and cardiovascular events,

1  
2  
3  
4  
5  
6 participants who experienced the corresponding competing events prior to the event of  
7  
8 interest were also censored.  
9

10  
11  
12  
13  
14 Main analyses were conducted by CKD status, adjusting for a range of baseline  
15  
16 covariates, including age (continuous), gender (male or female), CKD stage (3a, 3b and  
17  
18 4; for CKD cohort), BMI (18.5–24.9, 25.0–29.9, 30.0–34.9, 35.0–39.9 and 40.0–44.9  
19  
20 kg/m<sup>2</sup>), deprivation level (quintile; 1, least deprived, to 5, most deprived), duration of  
21  
22 diabetes (1.0–4.9 5.0–9.9 and 10+ years), a history of cardiovascular diseases, including  
23  
24 CHD and stroke, and prescribing during six months prior to the index date of  
25  
26 antidiabetic drugs (none, insulin with and without other antidiabetic drugs, and  
27  
28 non-insulin drugs only), antihypertensive drugs (none, drugs acting on renin-angiotensin  
29  
30 system with and without other antihypertensive drugs, and other classes of  
31  
32 antihypertensive drugs only, including  $\beta$ -blockers, calcium channel blockers, and  
33  
34 thiazide diuretics), statins and antiplatelet drugs, and index year (2006 to 2010). In  
35  
36 addition, the association of CKD with the outcomes were evaluated according to the  
37  
38 number of risk factors controlled, adjusting for the potential confounding factors  
39  
40 described above.  
41  
42  
43  
44  
45  
46  
47  
48  
49  
50  
51  
52  
53  
54  
55  
56  
57  
58  
59  
60

1  
2  
3  
4  
5  
6 In this paper, the results for participants with CKD were focused on, with the results for  
7  
8 those with non-CKD shown for comparative purposes. All analyses were performed  
9  
10 using Stata version 14 (Stata Corp., College Station TX). The ‘forestplot’ package in R  
11  
12 was used to present the results [25].  
13  
14  
15  
16  
17  
18  
19

## 20 **Results**

### 21 *Characteristics of the study population*

22  
23 Baseline characteristics of the study cohort are shown according to CKD status in table  
24  
25  
26  
27  
28 1. Mean index eGFR was 49 mL/min/1.73 m<sup>2</sup> for participants with CKD and 81  
29  
30 mL/min/1.73 m<sup>2</sup> for those with non-CKD. Participants with CKD were older (71 vs 62  
31  
32 years), included more women (52% vs 40%), had a longer duration of diabetes, and  
33  
34 were more likely to have a history of cardiovascular diseases (37% vs 22%). HbA1c and  
35  
36 total cholesterol were slightly lower in participants with CKD. Although diastolic blood  
37  
38 pressure was lower in participants with CKD, systolic blood pressure was higher despite  
39  
40 more people under antihypertensive medications. Participants with CKD were  
41  
42 prescribed insulin, drugs on renin-angiotensin systems, statins, and antipatelet drugs  
43  
44 more frequently.  
45  
46  
47  
48  
49  
50  
51  
52  
53  
54  
55  
56  
57  
58  
59  
60

### *Implementation of MRFC*

The number of risk factors controlled from four components of MRFC are shown in table 2. More detailed results of which of the components were controlled are available in table S1. Higher rates of control for HbA1c, total cholesterol and smoking status were observed in participants with CKD compared with those with non-CKD. However, blood pressure was less likely managed in participants with CKD (46% vs 51%). There were some differences in management status according to a history of cardiovascular diseases: in participants with CKD, higher rates of control of blood pressure (49% vs 44%) and total cholesterol (83% vs 76%) in participants with a history of cardiovascular diseases compared with those without. Participants meeting three or four criteria accounted for 37% or 13% in participants with CKD.

### *Effectiveness of MRFC*

Absolute risks for mortality and cardiovascular diseases and adjusted relative hazards of the number of risk factors controlled for the outcomes are shown in figure 1. Increasing MRFC was associated with lower relative hazards for all outcomes studied relative to participants meeting no or one criterion. For participants with CKD meeting four MRFC criteria, the adjusted hazard ratio (HR) for all-cause mortality was 0.59 (95% CI 0.52 to

1  
2  
3  
4  
5  
6 0.67) and adjusted subdistribution HR for cardiovascular mortality was 0.58 (0.49 to  
7  
8 0.69). Participants meeting four criteria also had lower relative risks for CHD (adjusted  
9  
10 subdistribution HR 0.73, 95% CI 0.59 to 0.91) and stroke (0.61, 0.43 to 0.86) in  
11  
12 participants with CKD. In participants with non-CKD, increasing MRFC was also  
13  
14 associated with lower risks for all-cause and cardiovascular mortality, CHD and stroke.  
15  
16  
17  
18  
19  
20  
21  
22

### 23 *Comparisons between CKD and non-CKD*

24  
25 Unadjusted absolute risks for mortality and cardiovascular diseases were higher in  
26  
27 participants with CKD by 1.4- to 2.9-fold compared with those with non-CKD at the  
28  
29 same MRFC category (figure 1). More participants with CKD died from cardiovascular  
30  
31 causes compared with those without (63% vs 54%,  $P<0.001$ ). Relative hazards of CKD  
32  
33 for the outcomes are shown in figure 2. After adjustment with possible confounding  
34  
35 factors, comorbid CKD remained to be associated with greater risks for all-cause  
36  
37 mortality (adjusted HR, 1.18 to 1.32), cardiovascular mortality (adjusted subdistribution  
38  
39 HR, 1.28 to 1.44) and CHD (1.08 to 1.25). However, the associations of comorbid CKD  
40  
41 with stroke was observed in participants meeting four criteria only (1.64).  
42  
43  
44  
45  
46  
47  
48  
49  
50  
51  
52  
53

### 54 **Discussion**



1  
2  
3  
4  
5  
6 In this population-based cohort study of 11,431 participants with type 2 diabetes and  
7  
8 CKD stages 3 to 4, MRFC was associated with lower relative risks for mortality and  
9  
10 cardiovascular diseases. We also confirmed that CKD was associated with increased  
11  
12 risks for mortality and cardiovascular events. Higher absolute risks for mortality and  
13  
14 cardiovascular events and great relative risk reduction associated with MRFC suggest  
15  
16 that the MRFC strategy may be one of the main approaches to potentially reducing the  
17  
18 burden of diabetes and CKD. Nevertheless, we found that the implementation of MRFC  
19  
20 in patients with diabetes was suboptimal in the clinical practice setting, as reported in  
21  
22 previous studies [10-12].  
23  
24  
25  
26  
27  
28  
29  
30  
31  
32  
33

34 This study evaluated the effectiveness of MRFC in patients with type 2 diabetes  
35  
36 according to presence or absence of CKD in clinical practice. So far, the associations of  
37  
38 MRFC with lower risks for mortality and cardiovascular events have been shown in  
39  
40 people with diabetes, not focusing on CKD status. Participants with controlled three risk  
41  
42 factors of HbA1c, blood pressure and LDL cholesterol had 62% and 60% risk reduction  
43  
44 for cardiovascular events and CHD, respectively, in patients with diabetes without  
45  
46 known cardiovascular diseases [11]. The associations of uncontrolled HbA1c, blood  
47  
48 pressure, LDL cholesterol and smoking with mortality and cardiovascular events were  
49  
50  
51  
52  
53  
54  
55  
56  
57  
58  
59  
60

1  
2  
3  
4  
5  
6 individually evaluated in a large population-based study with >850,000 participants  
7  
8 with diabetes [12]. The study cohort included 35.5% of CKD in those with  
9  
10 cardiovascular diseases and 21.8% in those without, and CKD was included in the  
11  
12 analyses for adjustment. This study suggested that uncontrolled risk factors attributed to  
13  
14 about 1 in 3 major cardiovascular events and fewer 1 in 10 deaths.  
15  
16  
17  
18  
19  
20  
21  
22

23 The strength of this study was the inclusion of a large size of >11,000 participants with  
24  
25 diabetes and CKD with an observation of >62,000 person-years. In addition to the large  
26  
27 sample size and long-term follow-up, representativeness from general population and  
28  
29 data quality are also advantages of the CPRD [14], which should remain even if linked  
30  
31 data for HES and ONS are only available for England practices. Instead, linked data for  
32  
33 hospital care and death registration substantially enhanced the validity of the study to  
34  
35 evaluate mortality and cardiovascular events.  
36  
37  
38  
39  
40  
41  
42  
43  
44

45 There are also some limitations in this study. First, despite our focus on the number of  
46  
47 MRFC, the impact of each of the risks factor on mortality and cardiovascular events  
48  
49 should be different. Second, we could not determine the causal relationships between  
50  
51 MRFC and mortality and cardiovascular events from this non-randomised study. Third,  
52  
53  
54  
55  
56  
57  
58  
59  
60

1  
2  
3  
4  
5  
6 there is a possibility of confounding by indication; thus, healthier participants were  
7  
8 managed more successfully and resulted in being categorised as those with greater  
9  
10 number of risk factors controlled. For example, stringent management of HbA1c might  
11  
12 not be targeted for vulnerable participants due to concerns for greater risk of  
13  
14 hypoglycaemia. Fourth, we cannot exclude the possibility of residual confounding  
15  
16 despite adjustment with a range of covariates in the analyses, including physical activity  
17  
18 and alcohol intake [26,27]. Albuminuria, not always available in our study, has been  
19  
20 known as a risk factor for mortality and cardiovascular diseases [28,29]. A recent study  
21  
22 suggested, however, that proteinuria status might not have substantial impact on  
23  
24 cardiovascular outcomes in patients with diabetes and CKD [30]. Fifth, measurement  
25  
26 and assay methods for HbA1c, blood pressure, cholesterol and serum creatinine might  
27  
28 not have been standardised among general practices or laboratories. As well as missing  
29  
30 data on ethnicity and fluctuations in serum creatinine values, these methodological  
31  
32 limitations might influence the determination of CKD status or staging. Finally,  
33  
34 although we used one of the largest primary care electronic health records database, it  
35  
36 seemed to be insufficient to separately evaluate MRFC for participants with different  
37  
38 stages of CKD. Further research is needed to focus on patients with more advanced  
39  
40 CKD who may have altered risk-benefit profile compared with patients with less  
41  
42  
43  
44  
45  
46  
47  
48  
49  
50  
51  
52  
53  
54  
55  
56

1  
2  
3  
4  
5  
6 impaired renal function.  
7  
8  
9

10  
11 In summary, based on the population-based cohort study of routine clinical practices,  
12  
13 MRFC may attenuate the increased risks for mortality and cardiovascular events in  
14  
15 people with diabetes and CKD. However, the implementation of MRFC is suboptimal,  
16  
17 and further research is needed to clarify underlying reasons to ensure more improved  
18  
19 achievement of MRFC in this population.  
20  
21  
22  
23  
24  
25  
26  
27

### 28 **Acknowledgments**

29  
30  
31 SH was supported by the Uehara Memorial Foundation Postdoctoral Fellowship, Tokyo,  
32  
33 Japan. MCG was supported by the National Institute for Health Research (NIHR)  
34  
35 Biomedical Research Centre at Guy's and St Thomas' NHS Foundation Trust and  
36  
37 King's College London. This study is based on data from the CPRD obtained under  
38  
39 license from the UK Medicines and Healthcare products Regulatory Agency. However,  
40  
41 the interpretation and conclusions contained in this report are those of the authors alone  
42  
43 and not necessarily those of the National Health Service, the NIHR or the Department  
44  
45 of Health.  
46  
47  
48  
49  
50  
51  
52  
53  
54  
55  
56  
57  
58  
59  
60

1  
2  
3  
4  
5  
6 **Contributors:** Both authors contributed to conception and study design of the study,  
7  
8 data acquisition, statistical analysis, and interpretation. SH drafted the manuscript and  
9  
10  
11 MCG revised it critically for important intellectual content.  
12

13  
14 **Funding:** This research received no specific grant from any funding agency.  
15

16  
17 **Competing interests:** None declared.  
18

19  
20 **Provenance and peer review:** Not commissioned; externally peer reviewed.  
21

22  
23 **Data sharing statement:** No additional data are available.  
24  
25  
26  
27

## 28 **References**

- 29  
30  
31 1. GBD 2013 Mortality and Causes of Death Collaborators. Global, regional, and  
32  
33 national age-sex specific all-cause and cause-specific mortality for 240 causes of  
34  
35 death, 1990-2013: a systematic analysis for the Global Burden of Disease Study  
36  
37 2013. *Lancet*. 2015;385(9963):117-171.  
38  
39  
40  
41  
42 2. Seuring T, Archangelidi O, Suhrcke M. The Economic Costs of Type 2 Diabetes:  
43  
44 A Global Systematic Review. *Pharmacoeconomics*. 2015;33(8):811-831.  
45  
46  
47  
48 3. Kerr M, Bray B, Medcalf J, O'Donoghue DJ, Matthews B. Estimating the  
49  
50 financial cost of chronic kidney disease to the NHS in England. *Nephrol Dial*  
51  
52 *Transplant*. 2012;27 Suppl 3:iii73-80.  
53  
54  
55  
56  
57

- 1  
2  
3  
4  
5  
6 4. Brück K, Stel VS, Gambaro G, Hallan S, Völzke H, Ärnlöv J, et al. CKD Prevalence  
7  
8 Varies across the European General Population. *J Am Soc Nephrol.*  
9  
10  
11 2016;27(7):2135-2147.  
12  
13
- 14 5. Holman RR, Paul SK, Bethel MA, Matthews DR, Neil HA. 10-year follow-up of  
15  
16 intensive glucose control in type 2 diabetes. *N Engl J Med.*  
17  
18 2008;359(15):1577-1589.  
19  
20  
21
- 22 6. Go AS, Chertow GM, Fan D, McCulloch CE, Hsu CY. Chronic kidney disease  
23  
24 and the risks of death, cardiovascular events, and hospitalization. *N Engl J Med.*  
25  
26 2004;351(13):1296-1305.  
27  
28  
29
- 30 7. Cea Soriano L, Johansson S, Stefansson B, Rodríguez LA. Cardiovascular events  
31  
32 and all-cause mortality in a cohort of 57,946 patients with type 2 diabetes:  
33  
34 associations with renal function and cardiovascular risk factors. *Cardiovasc*  
35  
36 *Diabetol.* 2015;14:38.  
37  
38  
39
- 40 8. Gaede P, Vedel P, Larsen N, Jensen GV, Parving HH, Pedersen O. Multifactorial  
41  
42 intervention and cardiovascular disease in patients with type 2 diabetes. *N Engl J*  
43  
44 *Med.* 2003;348(5):383-393.  
45  
46  
47
- 48 9. Gaede P, Lund-Andersen H, Parving HH, Pedersen O. Effect of a multifactorial  
49  
50 intervention on mortality in type 2 diabetes. *N Engl J Med.* 2008;358(6):580-591.  
51  
52  
53  
54  
55  
56

- 1  
2  
3  
4  
5  
6 10. Wong ND, Patao C, Wong K, Malik S, Franklin SS, Iloeje U. Trends in control of  
7  
8 cardiovascular risk factors among US adults with type 2 diabetes from 1999 to  
9  
10  
11 2010: comparison by prevalent cardiovascular disease status. *Diab Vasc Dis Res*.  
12  
13 2013;10(6):505-513.  
14  
15  
16  
17 11. Wong ND, Zhao Y, Patel R, Patao C, Malik S, Bertoni AG, et al. Cardiovascular  
18  
19 Risk Factor Targets and Cardiovascular Disease Event Risk in Diabetes: A  
20  
21 Pooling Project of the Atherosclerosis Risk in Communities Study, Multi-Ethnic  
22  
23 Study of Atherosclerosis, and Jackson Heart Study. *Diabetes Care*.  
24  
25 2016;39(5):668-676.  
26  
27  
28  
29  
30  
31 12. Vazquez-Benitez G, Desai JR, Xu S, Goodrich GK, Schroeder EB, Nichols GA, et  
32  
33 al. Preventable major cardiovascular events associated with uncontrolled glucose,  
34  
35 blood pressure, and lipids and active smoking in adults with diabetes with and  
36  
37 without cardiovascular disease: a contemporary analysis. *Diabetes Care*.  
38  
39 2015;38(5):905-912.  
40  
41  
42  
43  
44  
45 13. Konstantinidis I, Nadkarni GN, Yacoub R, Saha A, Simoes P, Parikh CR, et al.  
46  
47 Representation of Patients With Kidney Disease in Trials of Cardiovascular  
48  
49 Interventions: An Updated Systematic Review. *JAMA Intern Med*.  
50  
51 2016;176(1):121-124.  
52  
53  
54  
55  
56  
57  
58  
59  
60

- 1  
2  
3  
4  
5  
6 14. Herrett E, Gallagher AM, Bhaskaran K, Forbes H, Mathur R, van Staa T, et al.  
7  
8 Data Resource Profile: Clinical Practice Research Datalink (CPRD). *Int J*  
9  
10 *Epidemiol.* 2015;44(3):827-836.  
11  
12  
13  
14 15. Nicholas J, Charlton J, Dregan A, Gulliford MC. Recent HbA1c values and  
15  
16 mortality risk in type 2 diabetes. population-based case-control study. *PLoS One.*  
17  
18 2013;8(7):e68008.  
19  
20  
21  
22 16. Adamsson Eryd S, Gudbjörnsdottir S, Manhem K, Rosengren A, Svensson AM,  
23  
24 Miftaraj M, et al. Blood pressure and complications in individuals with type 2  
25  
26 diabetes and no previous cardiovascular disease: national population based cohort  
27  
28 study. *BMJ.* 2016;354:i4070.  
29  
30  
31  
32  
33 17. Levey AS, Stevens LA, Schmid CH, Zhang YL, Castro AF 3rd, Feldman HI, et al.  
34  
35 A new equation to estimate glomerular filtration rate. *Ann Intern Med.*  
36  
37 2009;150(9):604-612.  
38  
39  
40  
41  
42 18. Kontopantelis E, Springate DA, Reeves D, Ashcroft DM, Rutter MK, Buchan I, et  
43  
44 al. Glucose, blood pressure and cholesterol levels and their relationships to  
45  
46 clinical outcomes in type 2 diabetes: a retrospective cohort study. *Diabetologia.*  
47  
48 2015;58(3):505-518.  
49  
50  
51  
52 19. Afghahi H, Svensson MK, Pirouzifard M, Eliasson B, Svensson AM. Blood  
53  
54  
55  
56



- 1  
2  
3  
4  
5  
6 pressure level and risk of major cardiovascular events and all-cause of mortality in  
7  
8 patients with type 2 diabetes and renal impairment: an observational study from  
9  
10 the Swedish National Diabetes Register. *Diabetologia*. 2015;58(6):1203-1211.  
11  
12  
13  
14 20. Herrington W, Staplin N, Judge PK, Mafham M, Emberson J, Haynes R, et al.  
15  
16 Evidence for Reverse Causality in the Association Between Blood Pressure and  
17  
18 Cardiovascular Risk in Patients With Chronic Kidney Disease. *Hypertension*.  
19  
20 2017;69(2):314-322.  
21  
22  
23  
24  
25 21. Weiner DE, Sarnak MJ. Managing dyslipidemia in chronic kidney disease. *J Gen*  
26  
27 *Intern Med*. 2004;19(10):1045-1052.  
28  
29  
30  
31 22. Gulliford MC, Charlton J, Ashworth M, Rudd AG, Toshke AM; eCRT Research  
32  
33 Team. Selection of medical diagnostic codes for analysis of electronic patient  
34  
35 records. Application to stroke in a primary care database. *PLoS One*.  
36  
37 2009;4(9):e7168.  
38  
39  
40  
41  
42 23. Bhattarai N, Charlton J, Rudisill C, Gulliford MC. Coding, recording and  
43  
44 incidence of different forms of coronary heart disease in primary care. *PLoS One*.  
45  
46 2012;7(1):e29776.  
47  
48  
49  
50  
51 24. Austin PC, Lee DS, Fine JP. Introduction to the Analysis of Survival Data in the  
52  
53 Presence of Competing Risks. *Circulation*. 2016;133(6):601-609.  
54  
55  
56  
57  
58  
59  
60

- 1  
2  
3  
4  
5  
6 25. Gordon M, Lumley T. Advanced Forest Plot Using 'grid' Graphics. Vienna: The  
7  
8 Comprehensive R Archive Network, 2016.  
9  
10  
11 26. Anand SS, Islam S, Rosengren A, Franzosi MG, Steyn K, Yusufali AH, et al. Risk  
12  
13 factors for myocardial infarction in women and men: insights from the  
14  
15 INTERHEART study. *Eur Heart J*. 2008;29(7):932-940.  
16  
17  
18 27. O'Donnell MJ, Xavier D, Liu L, Zhang H, Chin SL, Rao-Melacini P, et al. Risk  
19  
20 factors for ischaemic and intracerebral haemorrhagic stroke in 22 countries (the  
21  
22 INTERSTROKE study): a case-control study. *Lancet*. 2010;376(9735):112-123.  
23  
24  
25  
26  
27 28. Chronic Kidney Disease Prognosis Consortium., Matsushita K, van der Velde M,  
28  
29 Astor BC, et al. Association of estimated glomerular filtration rate and  
30  
31 albuminuria with all-cause and cardiovascular mortality in general population  
32  
33 cohorts: a collaborative meta-analysis. *Lancet*. 2010;375(9731):2073-2081.  
34  
35  
36  
37  
38 29. Matsushita K, Coresh J, Sang Y, Chalmers J, Fox C, Guallar E, et al. Estimated  
39  
40 glomerular filtration rate and albuminuria for prediction of cardiovascular  
41  
42 outcomes: a collaborative meta-analysis of individual participant data. *Lancet*  
43  
44  
45  
46  
47  
48 *Diabetes Endocrinol*. 2015;3(7):514-525.  
49  
50  
51 30. Lee E, Oh HJ, Park JT, Han SH, Ryu DR, Kang SW, et al. The Incidence of  
52  
53 Cardiovascular Events Is Comparable Between Normoalbuminuric and  
54  
55  
56  
57  
58  
59  
60

1  
2  
3  
4  
5  
6  
7  
8  
9  
10  
11  
12  
13  
14  
15  
16  
17  
18  
19  
20  
21  
22  
23  
24  
25  
26  
27  
28  
29  
30  
31  
32  
33  
34  
35  
36  
37  
38  
39  
40  
41  
42  
43  
44  
45  
46  
47  
48  
49  
50  
51  
52  
53  
54  
55  
56  
57  
58  
59  
60

Albuminuric Diabetic Patients With Chronic Kidney Disease. *Medicine*  
*(Baltimore)*. 2016;95(15):e3175.

For peer review only

**Table 1.** Baseline characteristics of the study cohort by CKD status

|                                                 |                    | CKD<br>(N=11,431) | Non-CKD<br>(N=36,429) | P value |
|-------------------------------------------------|--------------------|-------------------|-----------------------|---------|
| Age (years)                                     | Mean (SD)          | 71 (6)            | 62 (9)                | <0.001  |
| Gender                                          | Male               | 5,481 (48)        | 22,006 (60)           | <0.001  |
|                                                 | Female             | 5,950 (52)        | 14,423 (40)           |         |
| eGFR (mL/min/1.73 m <sup>2</sup> )              | Mean (SD)          | 49 (9)            | 81 (13)               | –       |
|                                                 | 15–29              | 558 (5)           | –                     |         |
|                                                 | 30–44              | 2,655 (23)        | –                     |         |
|                                                 | 45–59              | 8,218 (72)        | –                     |         |
| Smoking status                                  | Non-smoker         | 5,426 (47)        | 16,511 (45)           | <0.001  |
|                                                 | Ex-smoker          | 4,327 (38)        | 12,217 (34)           |         |
|                                                 | Current smoker     | 1,678 (15)        | 7,701 (21)            |         |
| BMI (kg/m <sup>2</sup> )                        | 18.5–24.9          | 1,459 (13)        | 4,097 (11)            | <0.001  |
|                                                 | 25.0–29.9          | 4,329 (38)        | 13,054 (36)           |         |
|                                                 | 30.0–34.9          | 3,527 (31)        | 11,485 (32)           |         |
|                                                 | 35.0–39.9          | 1,541 (13)        | 5,454 (15)            |         |
|                                                 | 40.0–44.9          | 575 (5)           | 2,339 (6)             |         |
| Deprivation level (quintile)                    | 1 (least deprived) | 1,508 (13)        | 4,785 (13)            | 0.293   |
|                                                 | 2                  | 2,331 (20)        | 7,300 (20)            |         |
|                                                 | 3                  | 2,374 (21)        | 7,640 (21)            |         |
|                                                 | 4                  | 2,637 (23)        | 8,172 (22)            |         |
|                                                 | 5 (most deprived)  | 2,581 (23)        | 8,532 (23)            |         |
| Duration of diabetes (years)                    | 1.0–4.9            | 5,208 (46)        | 22,527 (62)           | <0.001  |
|                                                 | 5.0–9.9            | 2,954 (26)        | 8,356 (23)            |         |
|                                                 | ≥10.0              | 3,269 (29)        | 5,546 (15)            |         |
| History of coronary heart disease and/or stroke |                    | 4,215 (37)        | 7,860 (22)            | <0.001  |
| HbA1c (mmol/mol/%)                              | 42–47 (6.0–6.4)*   | 1,307 (11)        | 3,513 (10)            | <0.001  |
|                                                 | 48–52 (6.5–6.9)    | 3,041 (27)        | 8,900 (24)            |         |
|                                                 | 53–57 (7.0–7.4)    | 2,590 (23)        | 7,781 (21)            |         |
|                                                 | 58–63 (7.5–7.9)    | 1,709 (15)        | 5,461 (15)            |         |
|                                                 | 64–68 (8.0–8.4)    | 1,038 (9)         | 3,567 (10)            |         |
|                                                 | ≥69 (≥8.5)         | 1,746 (15)        | 7,207 (20)            |         |
| Systolic blood pressure                         | 120–129            | 1,777 (16)        | 7,203 (20)            | <0.001  |

|  |                                 |                                              |            |             |        |
|--|---------------------------------|----------------------------------------------|------------|-------------|--------|
|  | (mmHg)                          |                                              |            |             |        |
|  |                                 | 130–139                                      | 3,508 (31) | 12,121 (33) |        |
|  |                                 | 140–149                                      | 3,387 (30) | 10,242 (28) |        |
|  |                                 | ≥150                                         | 2,759 (24) | 6,863 (19)  |        |
|  | Diastolic blood pressure (mmHg) | 60–79                                        | 7,238 (63) | 16,803 (46) | <0.001 |
|  |                                 | 80–89                                        | 3,599 (31) | 15,816 (43) |        |
|  |                                 | ≥90                                          | 594 (5)    | 3,810 (10)  |        |
|  | Total cholesterol (mmol/L)      | 3.0–3.9                                      | 3,782 (33) | 10,960 (30) | <0.001 |
|  |                                 | 4.0–4.9                                      | 5,220 (46) | 16,387 (45) |        |
|  |                                 | ≥5.0                                         | 2,429 (21) | 9,082 (25)  |        |
|  | Medication                      | Antidiabetic drugs                           |            |             | <0.001 |
|  |                                 | Insulin (± non-insulin)                      | 1,805 (16) | 3,225 (9)   |        |
|  |                                 | Non-insulin only                             | 7,722 (68) | 26,753 (73) |        |
|  |                                 | Antihypertensive drugs                       |            |             | <0.001 |
|  |                                 | Drugs on renin-angiotensin system (± others) | 8,472 (74) | 21,535 (59) |        |
|  |                                 | Other antihypertensive drugs only            | 1,610 (14) | 4,751 (13)  |        |
|  |                                 | Statins                                      | 9,004 (79) | 27,011 (74) | <0.001 |
|  |                                 | Antiplatelet drugs                           | 6,440 (56) | 16,375 (45) | <0.001 |
|  | Index year                      | 2006                                         | 9,091 (80) | 24,192 (66) | <0.001 |
|  |                                 | 2007                                         | 1,008 (9)  | 3,741 (10)  |        |
|  |                                 | 2008                                         | 545 (5)    | 2,880 (8)   |        |
|  |                                 | 2009                                         | 432 (4)    | 2,677 (7)   |        |
|  |                                 | 2010                                         | 355 (3)    | 2,939 (8)   |        |

BMI, body mass index; CKD, chronic kidney disease; eGFR, estimated glomerular filtration rate

\* Participants with HbA1c <48 mmol/mol (<6.5%) were only included if they were prescribed antidiabetic drugs.

**Table 2.** Risk factors controlled according to chronic kidney disease and a history of cardiovascular diseases

|                                          | CKD                 |                     |                  | Non-CKD             |                      |                  |
|------------------------------------------|---------------------|---------------------|------------------|---------------------|----------------------|------------------|
|                                          | Total<br>(N=11,431) | No CVD<br>(N=7,216) | CVD<br>(N=4,215) | Total<br>(N=36,429) | No CVD<br>(N=28,569) | CVD<br>(N=7,860) |
| <i>Individual risk factor controlled</i> |                     |                     |                  |                     |                      |                  |
| HbA1c <53 mmol/mol (<7.0%)               | 4,348 (38)          | 2,767 (38)          | 1,581 (38)       | 12,413 (34)         | 9,603 (34)           | 2,810 (36)       |
| Blood pressure <140 & <90 mmHg           | 5,224 (46)          | 3,147 (44)          | 2,077 (49)       | 18,655 (51)         | 14,438 (51)          | 4,217 (54)       |
| Total cholesterol <5 mmol/L              | 9,002 (79)          | 5,512 (76)          | 3,490 (83)       | 27,347 (75)         | 20,826 (73)          | 6,521 (83)       |
| No smoking                               | 9,753 (85)          | 6,193 (86)          | 3,560 (84)       | 28,728 (79)         | 22,565 (79)          | 6,163 (78)       |
| <i>Number of risk factors controlled</i> |                     |                     |                  |                     |                      |                  |
| 0                                        | 138 (1)             | 87 (1)              | 51 (1)           | 806 (2)             | 678 (2)              | 128 (2)          |
| 1                                        | 1,427 (12)          | 971 (13)            | 456 (11)         | 5,372 (15)          | 4,421 (15)           | 951 (12)         |
| 2                                        | 4,162 (36)          | 2,693 (37)          | 1,469 (35)       | 13,288 (36)         | 10,602 (37)          | 2,686 (34)       |
| 3                                        | 4,240 (37)          | 2,598 (36)          | 1,642 (39)       | 12,657 (35)         | 9,665 (34)           | 2,992 (38)       |
| 4                                        | 1,464 (13)          | 867 (12)            | 597 (14)         | 4,306 (12)          | 3,203 (11)           | 1,103 (14)       |

CKD, chronic kidney disease; CVD, (a history of) cardiovascular diseases

## Figure legends

**Figure 1.** Relative hazards of the number of risk factors controlled for mortality and cardiovascular events in (a) participants with chronic kidney disease (CKD) and (b) participants with non-CKD. Hazard ratios (HRs) for all-cause mortality and subdistribution hazard ratios (SHRs) for cardiovascular mortality, coronary heart disease and stroke were adjusted for age, gender, CKD stage (for CKD cohort) body mass index, deprivation level, duration of diabetes, a history of cardiovascular diseases (for mortality evaluation), prescribing of antidiabetic, antihypertensive, statins and antiplatelet drugs, and index year.

**Figure 2.** Relative hazards of presence of chronic kidney disease for mortality and cardiovascular events compared with non-CKD as reference. Hazard ratios (HRs) for all-cause mortality and subdistribution hazard ratios (SHRs) for cardiovascular mortality, coronary heart disease and stroke were adjusted for age, gender, body mass index, deprivation level, duration of diabetes, a history of cardiovascular diseases (for mortality evaluation), prescribing of antidiabetic, antihypertensive, statins and antiplatelet drugs, and index year.

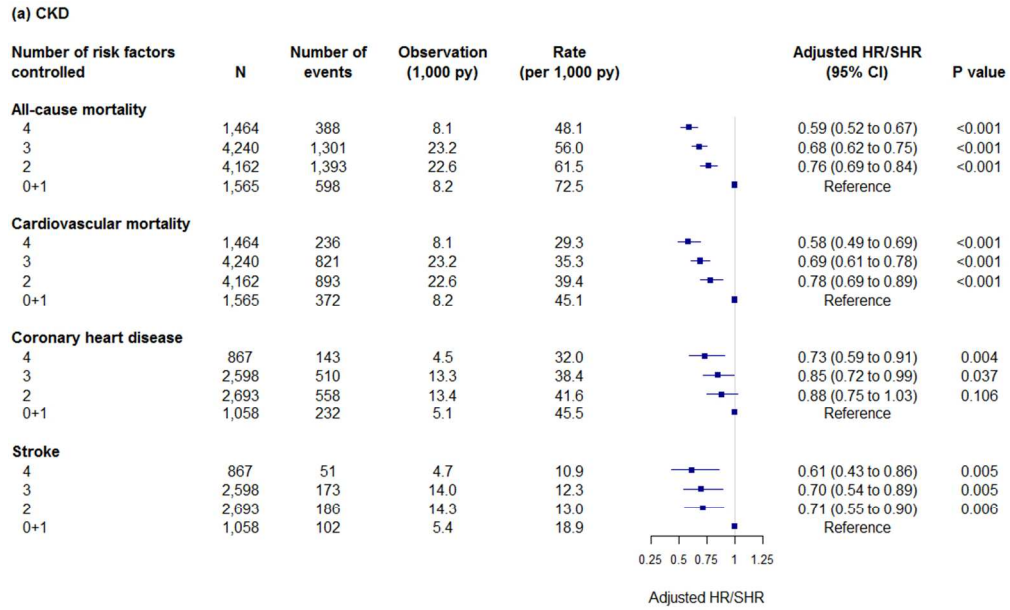

Figure 1a

284x173mm (96 x 96 DPI)



## (b) Non-CKD

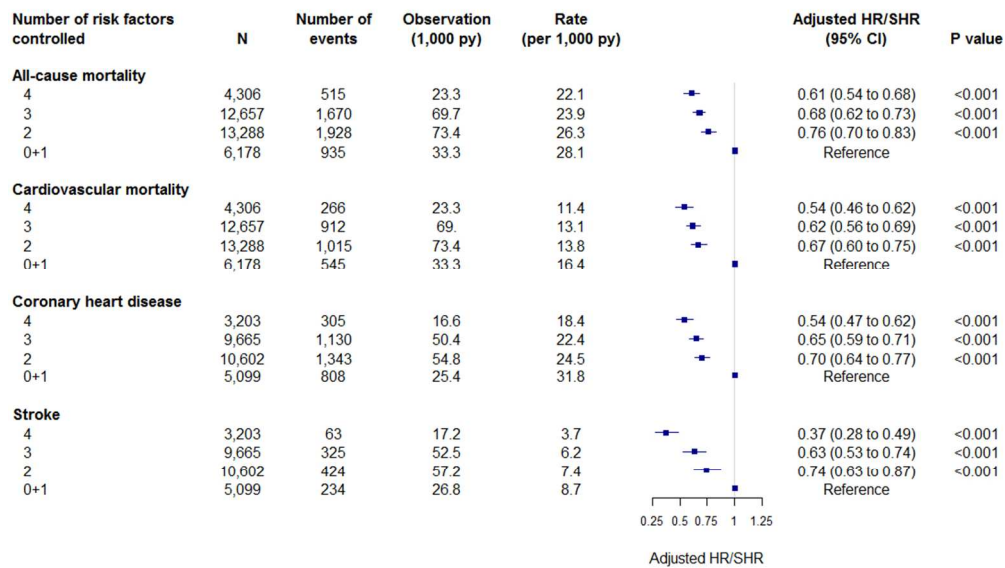

Figure 1b

287x172mm (96 x 96 DPI)

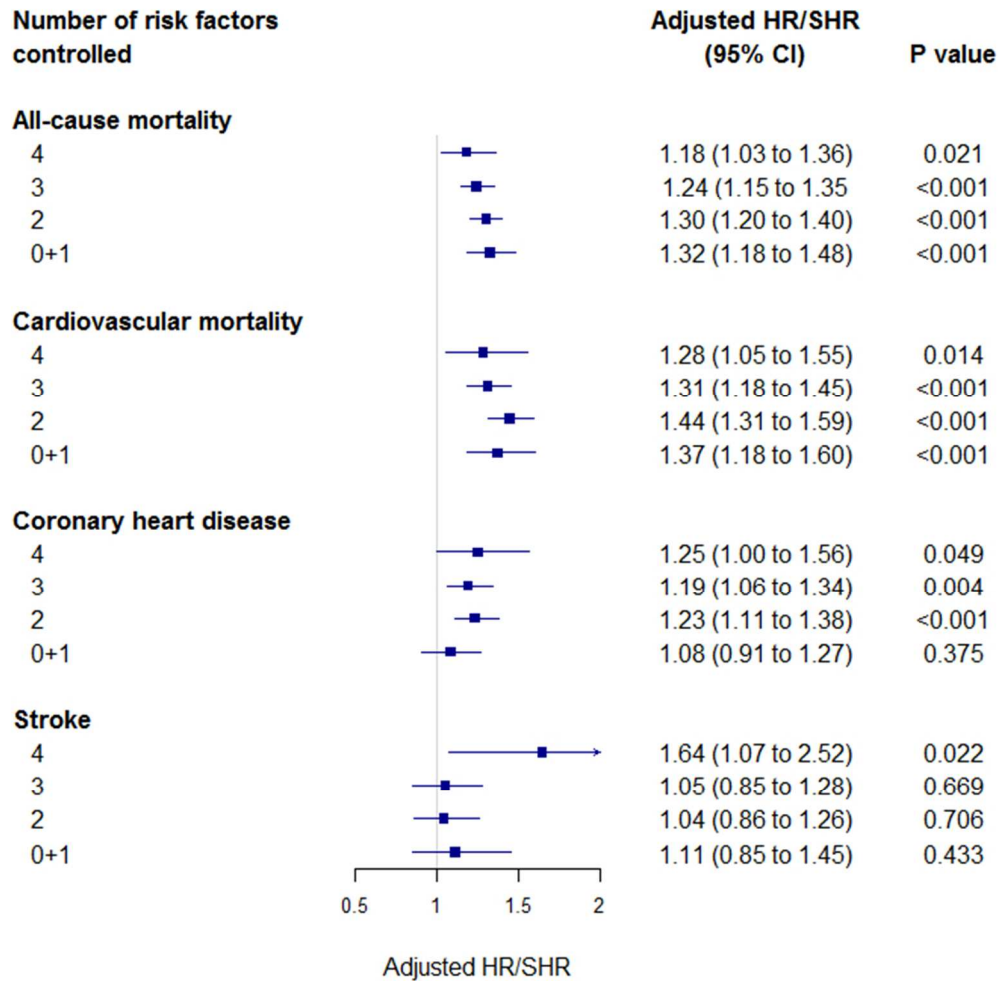

Figure 2

175x173mm (96 x 96 DPI)

## SUPPLEMENTARY MATERIAL

**Figure S1.** Study cohort selection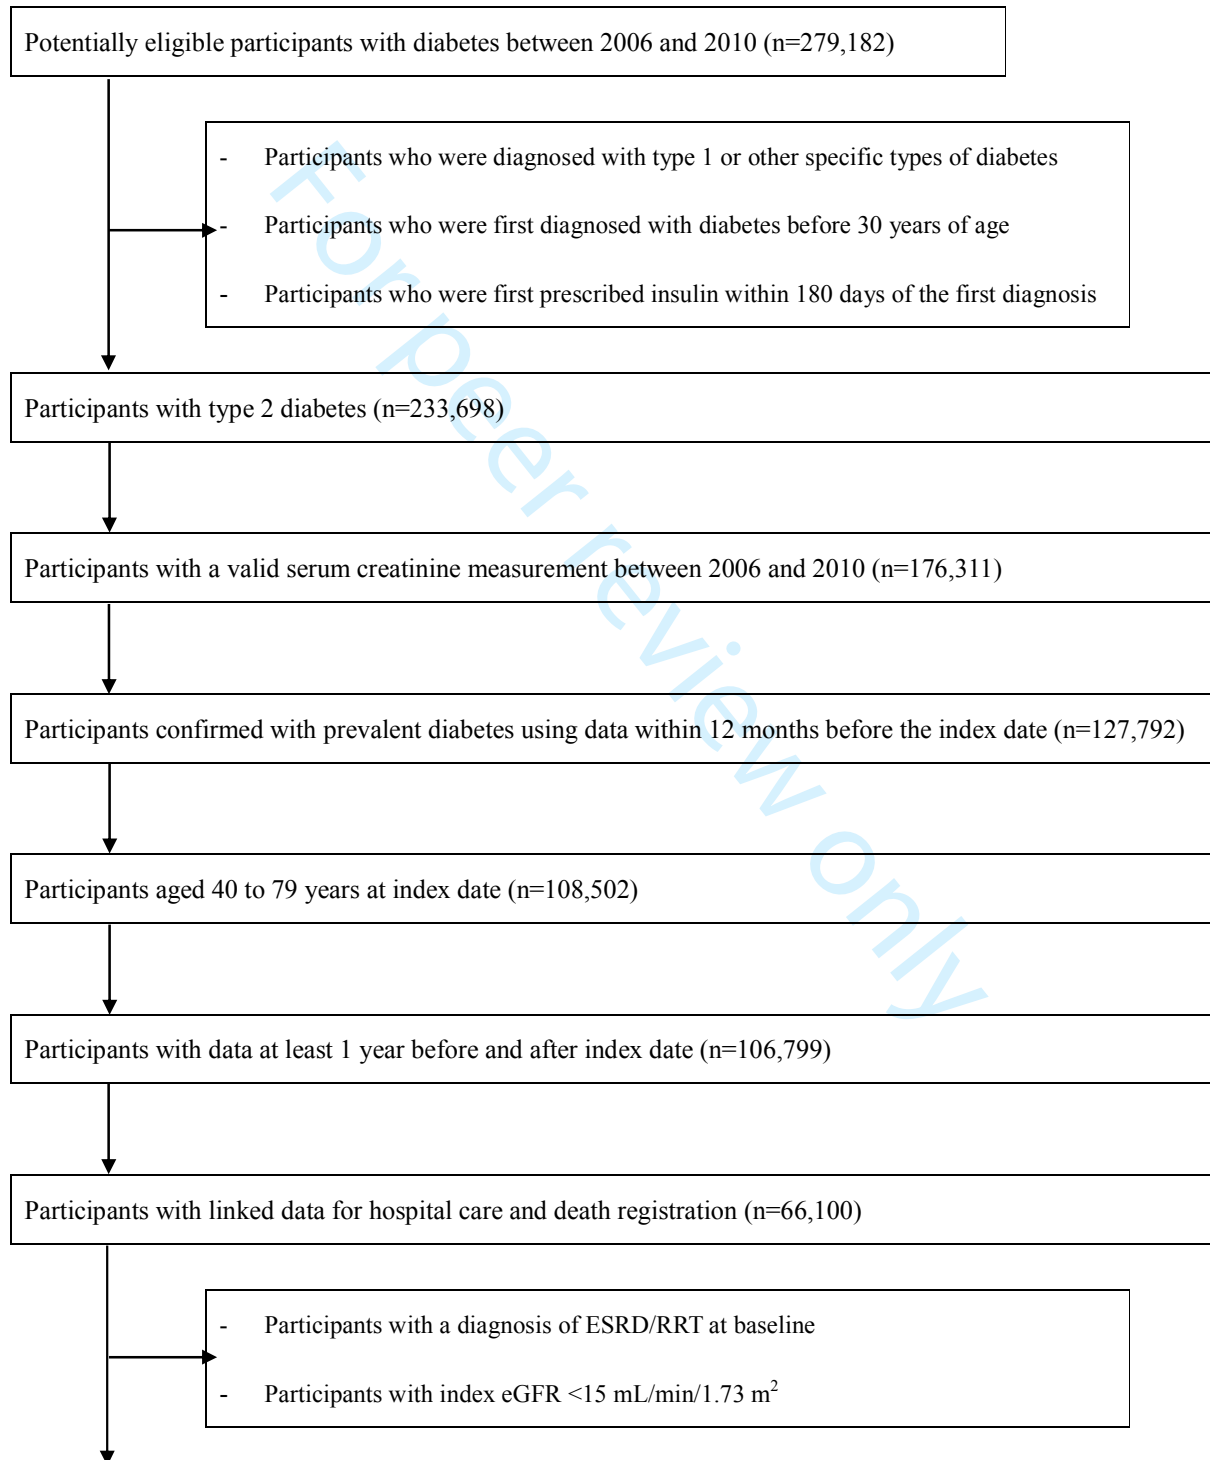

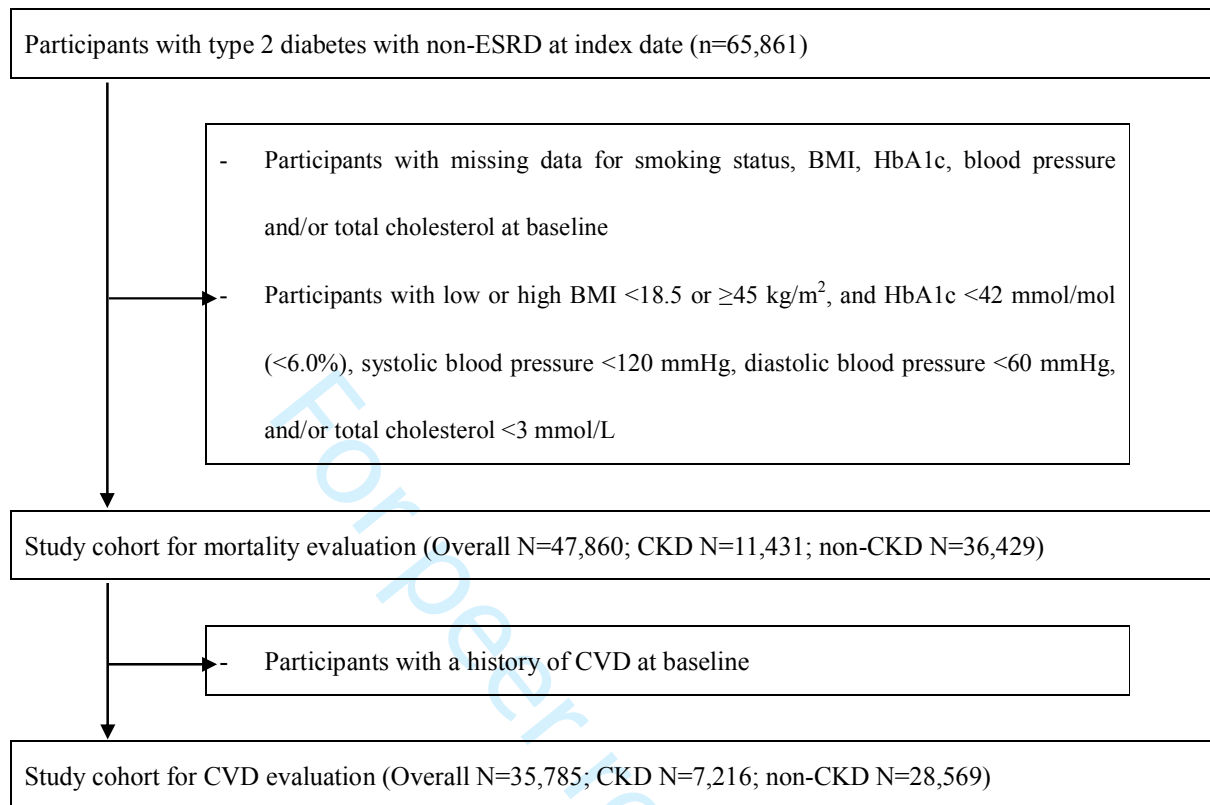

BMI, body mass index; CKD, chronic kidney disease; CVD, Cardiovascular diseases; eGFR, estimated glomerular filtration rate; ESRD, end-stage renal disease; RRT, renal replacement therapy

**Table S1.** Breakdown of risk factors controlled according to chronic kidney disease and a history of cardiovascular diseases

| Number of risk factors controlled | HbA1c <53 mmol/mol (<7.0%) | Blood pressure <140/90 mmHg | Total cholesterol <5 mmol/L | No smoking | CKD                |                  |               | Non-CKD            |                   |               |
|-----------------------------------|----------------------------|-----------------------------|-----------------------------|------------|--------------------|------------------|---------------|--------------------|-------------------|---------------|
|                                   |                            |                             |                             |            | Overall (N=11,431) | No CVD (N=7,216) | CVD (N=4,215) | Overall (N=36,429) | No CVD (N=28,569) | CVD (N=7,860) |
| 0                                 | –                          | –                           | –                           | –          | 138 (1)            | 87 (1)           | 51 (1)        | 806 (2)            | 678 (2)           | 128 (2)       |
| 1                                 | Y                          | –                           | –                           | –          | 69 (0.6)           | 46 (0.6)         | 23 (0.6)      | 312 (1)            | 260 (0.9)         | 52 (0.7)      |
|                                   | –                          | Y                           | –                           | –          | 89 (0.8)           | 64 (0.9)         | 25 (0.6)      | 759 (2)            | 624 (2)           | 135 (2)       |
|                                   | –                          | –                           | Y                           | –          | 438 (4)            | 264 (4)          | 174 (4)       | 1,742 (5)          | 1,350 (5)         | 392 (5)       |
|                                   | –                          | –                           | –                           | Y          | 831 (7)            | 597 (8)          | 234 (6)       | 2,559 (7)          | 2,187 (8)         | 372 (5)       |
|                                   | Y                          | Y                           | –                           | –          | 62 (0.5)           | 43 (0.6)         | 19 (0.5)      | 304 (0.8)          | 268 (0.9)         | 36 (0.5)      |
| 2                                 | Y                          | –                           | Y                           | –          | 245 (2)            | 152 (2)          | 93 (2)        | 794 (2)            | 590 (2)           | 204 (3)       |
|                                   | –                          | Y                           | –                           | Y          | 407 (4)            | 289 (4)          | 118 (3)       | 1,070 (3)          | 911 (3)           | 159 (2)       |
|                                   | –                          | –                           | Y                           | –          | 390 (3)            | 215 (3)          | 175 (4)       | 1,911 (5)          | 1,446 (5)         | 465 (6)       |
|                                   | –                          | Y                           | –                           | Y          | 531 (5)            | 379 (5)          | 152 (4)       | 2,205 (6)          | 1,910 (7)         | 295 (4)       |
|                                   | –                          | –                           | Y                           | Y          | 2,527 (22)         | 1,615 (22)       | 912 (22)      | 7,004 (19)         | 5,477 (19)        | 1,527 (19)    |
| 3                                 | Y                          | Y                           | Y                           | –          | 247 (2)            | 152 (2)          | 95 (2)        | 1,073 (3)          | 788 (3)           | 285 (4)       |
|                                   | –                          | Y                           | –                           | Y          | 302 (3)            | 199 (3)          | 103 (2)       | 1,067 (3)          | 905 (3)           | 162 (2)       |
|                                   | –                          | –                           | Y                           | Y          | 1,552 (14)         | 1,019 (14)       | 533 (13)      | 3,487 (10)         | 2,678 (9)         | 809 (10)      |
|                                   | –                          | Y                           | Y                           | Y          | 2,139 (19)         | 1,228 (17)       | 911 (22)      | 7,030 (19)         | 5,294 (19)        | 1,736 (22)    |
| 4                                 | Y                          | Y                           | Y                           | Y          | 1,464 (13)         | 867 (12)         | 597 (14)      | 4,306 (12)         | 3,203 (11)        | 1,103 (14)    |

Y, meeting the criterion; –, not meeting the criterion

CKD, chronic kidney disease; CVD, (a history of) cardiovascular diseases

**STROBE 2007 (v4) Statement—Checklist of items that should be included in reports of *cohort studies***

| Section/Topic            | Item # | Recommendation                                                                                                                                                                       | Reported on page # |
|--------------------------|--------|--------------------------------------------------------------------------------------------------------------------------------------------------------------------------------------|--------------------|
| Title and abstract       | 1      | (a) Indicate the study's design with a commonly used term in the title or the abstract                                                                                               | 1,2                |
|                          |        | (b) Provide in the abstract an informative and balanced summary of what was done and what was found                                                                                  | 2,3                |
| <b>Introduction</b>      |        |                                                                                                                                                                                      |                    |
| Background/rationale     | 2      | Explain the scientific background and rationale for the investigation being reported                                                                                                 | 5,6                |
| Objectives               | 3      | State specific objectives, including any prespecified hypotheses                                                                                                                     | 6                  |
| <b>Methods</b>           |        |                                                                                                                                                                                      |                    |
| Study design             | 4      | Present key elements of study design early in the paper                                                                                                                              | 6,7                |
| Setting                  | 5      | Describe the setting, locations, and relevant dates, including periods of recruitment, exposure, follow-up, and data collection                                                      | 6,7                |
| Participants             | 6      | (a) Give the eligibility criteria, and the sources and methods of selection of participants. Describe methods of follow-up                                                           | 7,8,10             |
|                          |        | (b) For matched studies, give matching criteria and number of exposed and unexposed                                                                                                  | NA                 |
| Variables                | 7      | Clearly define all outcomes, exposures, predictors, potential confounders, and effect modifiers. Give diagnostic criteria, if applicable                                             | 9                  |
| Data sources/measurement | 8*     | For each variable of interest, give sources of data and details of methods of assessment (measurement). Describe comparability of assessment methods if there is more than one group | 6-9                |
| Bias                     | 9      | Describe any efforts to address potential sources of bias                                                                                                                            | 10,11              |
| Study size               | 10     | Explain how the study size was arrived at                                                                                                                                            | 6-8                |
| Quantitative variables   | 11     | Explain how quantitative variables were handled in the analyses. If applicable, describe which groupings were chosen and why                                                         | 11                 |
| Statistical methods      | 12     | (a) Describe all statistical methods, including those used to control for confounding                                                                                                | 11                 |
|                          |        | (b) Describe any methods used to examine subgroups and interactions                                                                                                                  | 11                 |
|                          |        | (c) Explain how missing data were addressed                                                                                                                                          | 8                  |
|                          |        | (d) If applicable, explain how loss to follow-up was addressed                                                                                                                       | 10                 |
|                          |        | (e) Describe any sensitivity analyses                                                                                                                                                | NA                 |
| <b>Results</b>           |        |                                                                                                                                                                                      |                    |

|                          |     |                                                                                                                                                                                                              |               |
|--------------------------|-----|--------------------------------------------------------------------------------------------------------------------------------------------------------------------------------------------------------------|---------------|
| Participants             | 13* | (a) Report numbers of individuals at each stage of study—eg numbers potentially eligible, examined for eligibility, confirmed eligible, included in the study, completing follow-up, and analysed            | 12, Figure S1 |
|                          |     | (b) Give reasons for non-participation at each stage                                                                                                                                                         | 12, Figure S1 |
|                          |     | (c) Consider use of a flow diagram                                                                                                                                                                           | Figure S1     |
| Descriptive data         | 14* | (a) Give characteristics of study participants (eg demographic, clinical, social) and information on exposures and potential confounders                                                                     | 12, Table 1   |
|                          |     | (b) Indicate number of participants with missing data for each variable of interest                                                                                                                          | Figure S1     |
|                          |     | (c) Summarise follow-up time (eg, average and total amount)                                                                                                                                                  | Figure 1      |
| Outcome data             | 15* | Report numbers of outcome events or summary measures over time                                                                                                                                               | Figure 1      |
| Main results             | 16  | (a) Give unadjusted estimates and, if applicable, confounder-adjusted estimates and their precision (eg, 95% confidence interval). Make clear which confounders were adjusted for and why they were included | 12-14         |
|                          |     | (b) Report category boundaries when continuous variables were categorized                                                                                                                                    | 9             |
|                          |     | (c) If relevant, consider translating estimates of relative risk into absolute risk for a meaningful time period                                                                                             | NA            |
| Other analyses           | 17  | Report other analyses done—eg analyses of subgroups and interactions, and sensitivity analyses                                                                                                               | NA            |
| <b>Discussion</b>        |     |                                                                                                                                                                                                              |               |
| Key results              | 18  | Summarise key results with reference to study objectives                                                                                                                                                     | 14-15         |
| <b>Limitations</b>       |     |                                                                                                                                                                                                              |               |
| Interpretation           | 20  | Give a cautious overall interpretation of results considering objectives, limitations, multiplicity of analyses, results from similar studies, and other relevant evidence                                   | 15-17         |
| Generalisability         | 21  | Discuss the generalisability (external validity) of the study results                                                                                                                                        | 16, 17        |
| <b>Other information</b> |     |                                                                                                                                                                                                              |               |
| Funding                  | 22  | Give the source of funding and the role of the funders for the present study and, if applicable, for the original study on which the present article is based                                                | 18            |

\*Give information separately for cases and controls in case-control studies and, if applicable, for exposed and unexposed groups in cohort and cross-sectional studies.

**Note:** An Explanation and Elaboration article discusses each checklist item and gives methodological background and published examples of transparent reporting. The STROBE checklist is best used in conjunction with this article (freely available on the Web sites of PLoS Medicine at <http://www.plosmedicine.org/>, Annals of Internal Medicine at <http://www.annals.org/>, and Epidemiology at <http://www.epidem.com/>). Information on the STROBE Initiative is available at [www.strobe-statement.org](http://www.strobe-statement.org).

# BMJ Open

## Multiple risk factor control, mortality and cardiovascular events in type 2 diabetes and chronic kidney disease: a population-based cohort study

|                                 |                                                                                                                                |
|---------------------------------|--------------------------------------------------------------------------------------------------------------------------------|
| Journal:                        | <i>BMJ Open</i>                                                                                                                |
| Manuscript ID                   | bmjopen-2017-019950.R1                                                                                                         |
| Article Type:                   | Research                                                                                                                       |
| Date Submitted by the Author:   | 12-Jan-2018                                                                                                                    |
| Complete List of Authors:       | Hamada, Shota; Institute for Health Economics and Policy, Research Department<br>Gulliford, Martin; King's College London, UK, |
| <b>Primary Subject Heading</b>: | Diabetes and endocrinology                                                                                                     |
| Secondary Subject Heading:      | General practice / Family practice                                                                                             |
| Keywords:                       | cardiovascular diseases, chronic kidney disease, mortality, type 2 diabetes                                                    |
|                                 |                                                                                                                                |

SCHOLARONE™  
Manuscripts

Peer Review Only



1  
2  
3  
4  
5  
6 **Multiple risk factor control, mortality and cardiovascular events in type 2 diabetes**  
7  
8  
9 **and chronic kidney disease: a population-based cohort study**  
10

11  
12  
13  
14 Shota Hamada<sup>1,2</sup>, Martin C Gulliford<sup>1,3</sup>  
15

16  
17 1 Department of Primary Care and Public Health Sciences, King's College London, London, UK  
18

19  
20 2 Research Department, Institute for Health Economics and Policy, Association for Health  
21  
22 Economics Research and Social Insurance and Welfare, Tokyo, Japan  
23

24  
25 3 National Institute for Health Research Biomedical Research Centre at Guy's and St Thomas'  
26  
27 National Health Service Foundation Trust, London UK  
28  
29

30  
31  
32  
33  
34 Correspondence to: Shota Hamada  
35

36  
37 Research Department, Institute for Health Economics and Policy, Association for Health  
38

39  
40 Economics Research and Social Insurance and Welfare  
41

42 No.11 Toyo-kaiji Bldg, 1-5-11, Nishi-Shinbashi, Minato-ku, Tokyo, 105-0003 Japan  
43

44  
45 Tel: +81 3-3506-8529, Fax: +81 3-3506-8528, E-mail: [shota.hamada@ihp.jp](mailto:shota.hamada@ihp.jp)  
46  
47  
48  
49  
50  
51  
52  
53  
54  
55  
56

## Abstract

**OBJECTIVES:** This study aimed to evaluate the effectiveness of multiple risk factor control (MRFC) at reducing mortality and cardiovascular events in diabetes and chronic kidney disease (CKD) in clinical practice.

**DESIGN:** Population-based cohort study.

**SETTING:** Primary care database in the UK, linked with inpatient and mortality data.

**PARTICIPANTS:** Participants aged 40 to 79 years with type 2 diabetes and valid serum creatinine measurements, including 11,431 participants with CKD (eGFR 15–59 mL/min/1.73 m<sup>2</sup>) and 36,429 participants with non-CKD (eGFR ≥60 mL/min/1.73 m<sup>2</sup>).

**EXPOSURES:** MRFC consisted of four components: HbA1c <53 mmol/mol (<7.0%), blood pressure <140/90 mmHg, total cholesterol <5 mmol/L, and no smoking. The main exposure variable was the number of risk factors controlled at baseline.

**OUTCOME MEASURES:** All-cause and cardiovascular mortality in the overall participants. Cardiovascular events, including coronary heart disease and stroke, in participants limited to those without a history of cardiovascular diseases at baseline.

**RESULTS:** In participants with CKD, 37% or 13% met three or four MRFC criteria, respectively. Increasing numbers of risk factors controlled were associated with lower relative hazards for all outcomes studied compared with those meeting no or one

1  
2  
3  
4  
5  
6 criterion. For participants with CKD meeting four criteria, the adjusted hazard ratio  
7  
8 (HR) for all-cause mortality was 0.60 (95% confidence interval (CI) 0.53 to 0.69) and  
9  
10 the adjusted subdistribution HR for cardiovascular mortality was 0.60 (0.50 to 0.70),  
11  
12 considering a competing risk of non-cardiovascular death. Participants meeting four  
13  
14 criteria also had lower relative hazards for coronary heart disease (adjusted  
15  
16 subdistribution HR 0.73, 95% CI 0.59 to 0.91) and stroke (0.63, 0.45 to 0.89),  
17  
18 considering death as a competing risk.  
19  
20  
21  
22  
23

24  
25 **CONCLUSIONS:** MRFC may lower the increased risks for mortality and  
26  
27 cardiovascular events in people with diabetes and CKD. Further research is needed to  
28  
29 evaluate appropriateness of MRFC according to individual participants' health status for  
30  
31 improved management of cardiovascular risks in this population.  
32  
33  
34  
35  
36  
37  
38  
39

#### 40 **Strengths and limitations of this study**

- 41  
42 • This study included a large number of participants with type 2 diabetes and CKD  
43  
44 sampled from a representative general population with about 6 years of follow-up,  
45  
46 which enabled to determine the associations of cardiovascular risk factors with  
47  
48 mortality and cardiovascular events.  
49  
50
- 51  
52 • Linked data for hospital care and death registration with a primary care database  
53  
54  
55  
56

1  
2  
3  
4  
5  
6 enhanced the validity of the study to evaluate mortality and cardiovascular events.  
7

- 8
- 9 • We could not conclude that association represented causal relationships between  
10  
11 MRFC and mortality and cardiovascular events in this non-randomised study.  
12
  - 13  
14 • There is a possibility of confounding if healthier participants were managed more  
15  
16 successfully and this resulted in being categorised as those with greater number of  
17  
18 risk factors controlled.  
19  
20  
21  
22  
23  
24  
25  
26  
27  
28  
29  
30  
31  
32  
33  
34  
35  
36  
37  
38  
39  
40  
41  
42  
43  
44  
45  
46  
47  
48  
49  
50  
51  
52  
53  
54  
55  
56  
57

## Introduction

Diabetes and chronic kidney disease (CKD) are growing health problems worldwide, contributing to increased mortality [1]. Diabetes and CKD also impose a substantial economic burden on society, with particularly high costs relating to cardiovascular complications and renal replacement therapy [2,3]. The prevalence of CKD in patients with diabetes is between 4.2% and 17.9% (CKD stages 3 to 5) in European countries [4]. The leading cause of death in people with type 2 diabetes or CKD is cardiovascular disease rather than renal complications [5,6]. Prevention of cardiovascular events is a key focus in the management of patients with these conditions.

Multifactorial interventions to reduce cardiovascular risks were shown to be effective at reducing mortality and cardiovascular events in patients with type 2 diabetes and persistent microalbuminuria in the Steno-2 randomised trial [7,8]. This study provided a high level of evidence, but included a relatively small number of participants with diabetes who were managed in specialist centres. Recently, the implementation and effectiveness of this approach have been evaluated in patients with diabetes in clinical practice settings [9-11]. Epidemiological studies have demonstrated additional risks of CKD on mortality and cardiovascular diseases in people with diabetes [12], but

1  
2  
3  
4  
5  
6 treatment approaches in this population have not been well studied. No studies focused  
7  
8  
9 on multiple risk factor control (MRFC) in patients with both diabetes and CKD in a  
10  
11 wide clinical practice setting. Generally, patients with kidney disease have been  
12  
13 underrepresented in cardiovascular clinical trials [13]. This population may have an  
14  
15 altered risk-benefit profile, and extrapolation of data based on patients with normal  
16  
17 kidney function into patients with CKD may be unreliable [13]. We aimed to conduct a  
18  
19 pragmatic evaluation of the effectiveness of MRFC on mortality and cardiovascular  
20  
21 events in participants with type 2 diabetes and CKD in a population-based cohort study.  
22  
23  
24  
25  
26  
27  
28  
29  
30

## 31 **Methods**

### 32 *Data sources*

33  
34 This study employed a linked dataset derived from the UK Clinical Practice Research  
35  
36 Datalink (CPRD), the UK National Health Service Hospital Episodes Statistics (HES)  
37  
38 inpatient data, and the UK Office for National Statistics (ONS) mortality data. The  
39  
40 CPRD contains anonymised electronic health records from general practices across the  
41  
42 UK [14]. The CPRD collects data for diagnoses and clinical assessment, prescriptions  
43  
44 and laboratory test results, such as HbA1c and serum creatinine. The HES inpatient data  
45  
46 were comprised of inpatient records from all National Health Service hospitals in  
47  
48  
49  
50  
51  
52  
53  
54  
55  
56  
57  
58  
59  
60

1  
2  
3  
4  
5  
6 England. Information on the date of death and the causes of death were available in the  
7  
8 ONS mortality data file. Multiple causes of death can be recorded in the mortality data.  
9  
10  
11 Diagnoses and clinical evaluation in the CPRD were coded with the Read codes, a  
12  
13 hierarchical coding system used in primary care in the UK, whereas those in the HES  
14  
15 and ONS were coded with the International Classification of Diseases, tenth revision  
16  
17 (ICD-10). Linked data are available for general practices in England only and  
18  
19  
20 participants were limited to those with linked data for the HES and ONS available. The  
21  
22  
23 study was approved by the CPRD Independent Scientific Advisory Committee (ISAC  
24  
25  
26 Protocol 15\_201R).  
27  
28  
29  
30  
31  
32  
33

### 34 *Study population*

35  
36  
37 The scheme of the study cohort selection is presented in figure S1. We initially sampled  
38  
39 participants who were diagnosed with type 2 diabetes from the CPRD [15]. Using the  
40  
41 CPRD records, the date of the first valid serum creatinine value between 2006 and 2010  
42  
43 recorded more than one year after the first diagnosis of diabetes were defined as the  
44  
45 index date. A similar approach was taken by Adamsson Eryd et al [16] to ensure that  
46  
47  
48 participants managed for diabetes had sufficient time available for recording of baseline  
49  
50  
51 values. To avoid misclassification of CKD status and stage, the index serum creatinine  
52  
53  
54  
55  
56  
57  
58  
59  
60

1  
2  
3  
4  
5  
6 values were validated by confirmation of subsequent values within 30% of the index  
7  
8 values. We restricted the sample to participants aged 40 to 79 years at the index date  
9  
10 with at least one year of follow-up data available (ie, participants who died in the first  
11  
12 year of follow-up were excluded). Estimated glomerular filtration rate (eGFR) was  
13  
14 calculated from a serum creatinine value, age, gender, and ethnicity, using the Chronic  
15  
16 Kidney Disease Epidemiology Collaboration (CKD-EPI) equation [17]. Missing  
17  
18 ethnicity was assumed as 'non-black' in the present study. Participants diagnosed with  
19  
20 end-stage renal disease, those who had received renal replacement therapy, or those with  
21  
22 index eGFR  $<15$  mL/min/1.73 m<sup>2</sup> were excluded. We also excluded participants with  
23  
24 missing data for smoking status, body mass index (BMI), HbA1c, blood pressure, or  
25  
26 total cholesterol, or those with extreme BMI ( $<18.5$  or  $\geq 45$  kg/m<sup>2</sup>) at baseline. Since it  
27  
28 has been reported that low values of cardiovascular risk factors were not always  
29  
30 associated with better outcomes in observational studies [15,18,19], possibly due to  
31  
32 reverse causation [20,21], participants with low HbA1c ( $<42$  mmol/mol or  $<6.0\%$ ),  
33  
34 blood pressure (systolic  $<120$  or diastolic  $<60$  mmHg), and total cholesterol ( $<3$   
35  
36 mmol/L) were further excluded. Participants were categorised according to index eGFR  
37  
38 into participants with CKD ( $<60$  mL/min/1.73 m<sup>2</sup>) and those with non-CKD ( $\geq 60$   
39  
40 mL/min/1.73 m<sup>2</sup>).  
41  
42  
43  
44  
45  
46  
47  
48  
49  
50  
51  
52  
53  
54  
55  
56  
57  
58  
59  
60



### *Multiple risk factor control*

MRFC was defined in this study as consisting of four components: (1) HbA1c <53 mmol/mol (<7.0%), (2) blood pressure <140/90 mmHg (systolic <140 and diastolic <90 mmHg), (3) total cholesterol <5 mmol/L, and (4) no smoking (non- or ex-smokers). The means of HbA1c, blood pressure, and total cholesterol records within one year before the index date were evaluated. The number of the risk factors controlled from four criteria was treated as the exposure and included as a categorical variable in the analyses, with those meeting no or one criterion as a reference category.

### *Outcomes*

Main outcomes of interest in this study included all-cause and cardiovascular mortality, fatal and non-fatal coronary heart disease (CHD) and stroke. The date of death and causes of death were determined using the ONS mortality data. Participants who died from cardiovascular causes were identified if people had any of the ICD-10 codes I00 to I99 as a cause of death. Similarly, participants who died from renal causes were identified by the ICD-10 codes N17 to N19. All of the CPRD, HES and ONS were used to ascertain fatal and non-fatal CHD and stroke. Read codes for CHD and stroke

1  
2  
3  
4  
5  
6 reported previously [22,23] were updated for the present study. The ICD-10 codes for  
7  
8 CHD and stroke were I20 to I25 and I60, I61, I63 and I64, respectively.  
9

### 10 11 12 13 14 *Analysis*

15  
16  
17 Baseline characteristics of the study cohort were described according to CKD status.

18  
19  
20 Time-to-event analyses were conducted to evaluate the associations of MRFC with  
21  
22 mortality and cardiovascular events. To address the issue of reverse causation and to  
23  
24 avoid misclassification of the outcomes from those which had existed at baseline,  
25  
26 person-years for participants who experienced outcomes of interest in the first year of  
27  
28 follow-up were excluded from analyses (figure S1). Cox proportional hazards models  
29  
30  
31 were used to evaluate the association of MRFC with all-cause mortality. Proportional  
32  
33 hazards assumption was assessed by visual inspection of log-log plots, and no apparent  
34  
35 violation was found. Competing risks regression with subdistribution hazard models  
36  
37 were conducted for cardiovascular mortality and cardiovascular events, considering  
38  
39 competing risks for non-cardiovascular and all-cause death, respectively [24].  
40  
41  
42  
43  
44  
45  
46  
47

48 Associations of MRFC with cardiovascular events were evaluated in participants  
49  
50 without a known history of cardiovascular diseases at baseline (figure S1). Participants  
51  
52 were followed from the index date until the earliest of the events of interest, the last date  
53  
54  
55  
56

1  
2  
3  
4  
5  
6 of CPRD records, or 31 March 2015 for all-cause mortality evaluation. In the competing  
7  
8 risks regression analyses for cardiovascular mortality and cardiovascular events,  
9  
10 participants who experienced the corresponding competing events prior to the event of  
11  
12 interest were also censored.  
13  
14  
15

16  
17  
18  
19 Main analyses were conducted by CKD status, adjusting for a range of baseline  
20  
21 covariates, including age (continuous), gender (male or female), CKD stage (3a, 3b, and  
22  
23 4; for CKD cohort), BMI (18.5–24.9, 25.0–29.9, 30.0–34.9, 35.0–39.9, and 40.0–44.9  
24  
25 kg/m<sup>2</sup>), deprivation level (quintile; 1, least deprived, to 5, most deprived), duration of  
26  
27 diabetes (1.0–4.9, 5.0–9.9, and 10+ years), proteinuria status, including  
28  
29 microalbuminuria (yes, no, and a missing category), a history of cardiovascular diseases,  
30  
31 including CHD and stroke (for mortality evaluation), and prescribing during six months  
32  
33 prior to the index date of antidiabetic drugs (none, insulin with and without other  
34  
35 antidiabetic drugs, and non-insulin drugs only), antihypertensive drugs (none, drugs  
36  
37 acting on renin-angiotensin system with and without other antihypertensive drugs, and  
38  
39 other classes of antihypertensive drugs only, including  $\beta$ -blockers, calcium channel  
40  
41 blockers, and thiazide diuretics), statins and antiplatelet drugs, and index year (2006 to  
42  
43 2010). In addition, the associations of CKD with the outcomes were evaluated  
44  
45  
46  
47  
48  
49  
50  
51  
52  
53  
54  
55  
56  
57  
58  
59  
60

1  
2  
3  
4  
5  
6 according to the number of risk factors controlled, adjusting for the potential  
7  
8 confounding factors described above.  
9

10  
11  
12  
13  
14 In this paper, the results for participants with CKD were focused on, with the results for  
15  
16 those with non-CKD shown for comparative purposes. The associations of each  
17  
18 component of MRFC with the outcomes were also evaluated to aid interpretation of the  
19  
20 study results. All analyses were performed using Stata version 14 (Stata Corp., College  
21  
22 Station TX). The ‘forestplot’ package in R was used to present the results [25].  
23  
24  
25  
26  
27  
28  
29  
30

## 31 **Results**

### 32 *Characteristics of the study population*

33  
34  
35 Baseline characteristics of the study cohort are shown according to CKD status in table  
36  
37  
38  
39 1. Mean index eGFR was 49 mL/min/1.73 m<sup>2</sup> for participants with CKD and 81  
40  
41 mL/min/1.73 m<sup>2</sup> for those with non-CKD. Participants with CKD were older (71 vs 62  
42  
43 years), included more women (52% vs 40%), had a longer duration of diabetes, and  
44  
45 were more likely to have a history of cardiovascular diseases (37% vs 22%). A higher  
46  
47 frequency of proteinuria was recorded in participants with CKD (18% vs 12% among  
48  
49 participants with records of proteinuria status). HbA1c and total cholesterol were  
50  
51  
52  
53  
54  
55  
56  
57  
58  
59  
60

1  
2  
3  
4  
5  
6 slightly lower in participants with CKD. Although diastolic blood pressure was lower in  
7  
8 participants with CKD, systolic blood pressure was higher despite more people under  
9  
10 antihypertensive medications. Participants with CKD were prescribed insulin, drugs on  
11  
12 renin-angiotensin systems, statins, and antiplatelet drugs more frequently.  
13  
14  
15  
16  
17  
18  
19

### 20 *Implementation of MRFC*

21  
22 The number of risk factors controlled from four components of MRFC are shown in  
23  
24 table 2. More detailed results of which of the components were controlled are available  
25  
26 in table S1. Higher rates of control for HbA1c, total cholesterol, and smoking status  
27  
28 were observed in participants with CKD compared with those with non-CKD. However,  
29  
30 blood pressure was less likely managed in participants with CKD (46% vs 51%). There  
31  
32 were some differences in management status according to a history of cardiovascular  
33  
34 diseases: in participants with CKD, higher rates of control of blood pressure (49% vs  
35  
36 44%) and total cholesterol (83% vs 76%) in participants with a history of cardiovascular  
37  
38 diseases compared with those without. Participants meeting three or four criteria  
39  
40 accounted for 37% or 13% in participants with CKD.  
41  
42  
43  
44  
45  
46  
47  
48  
49  
50  
51  
52

### 53 *Effectiveness of MRFC*

1  
2  
3  
4  
5  
6 Absolute risks for mortality and cardiovascular diseases and adjusted relative hazards of  
7  
8 the number of risk factors controlled for the outcomes are shown in figure 1. Increasing  
9  
10 numbers of risk factors controlled were associated with lower relative hazards for all  
11  
12 outcomes studied relative to participants meeting no or one criterion. For participants  
13  
14 with CKD meeting four MRFC criteria, the adjusted hazard ratio (HR) for all-cause  
15  
16 mortality was 0.60 (95% CI 0.53 to 0.69), and adjusted subdistribution HR for  
17  
18 cardiovascular mortality was 0.60 (0.50 to 0.70). Participants meeting four criteria also  
19  
20 had lower relative risks for CHD (adjusted subdistribution HR 0.73, 95% CI 0.59 to  
21  
22 0.91) and stroke (0.63, 0.45 to 0.89) in participants with CKD. In participants with  
23  
24 non-CKD, increasing numbers of risk factors controlled were also associated with lower  
25  
26 risks for all-cause and cardiovascular mortality, CHD, and stroke. As shown in figure S2,  
27  
28 the strengths of associations of each component of MRFC with mortality and  
29  
30 cardiovascular diseases were different; for example, the greatest associations of no  
31  
32 smoking with all-cause and cardiovascular mortality were observed in participants with  
33  
34 and without CKD.  
35  
36  
37  
38  
39  
40  
41  
42  
43  
44  
45  
46  
47  
48  
49  
50

#### 51 *Comparisons between CKD and non-CKD*

52

53 Unadjusted absolute risks for mortality and cardiovascular diseases were higher in  
54  
55  
56

1  
2  
3  
4  
5  
6 participants with CKD by 1.4- to 2.9-fold compared with those with non-CKD at the  
7  
8 same MRFC category (figure 1). More participants with CKD died from cardiovascular  
9  
10 causes compared with those without (63% vs 54%,  $P<0.001$ ). More participants with  
11  
12 CKD died from renal causes ( $n=631$  or 5% vs  $n=326$  or 0.9%,  $P<0.001$ ), but the  
13  
14 proportions were much smaller than cardiovascular causes of death. Relative hazards of  
15  
16 CKD for the outcomes are shown in figure 2. After adjustment with possible  
17  
18 confounding factors, comorbid CKD remained to be associated with greater risks for  
19  
20 all-cause mortality (adjusted HR, 1.16 to 1.30) and cardiovascular mortality (adjusted  
21  
22 subdistribution HR, 1.25 to 1.41). In participants meeting two or more criteria,  
23  
24 comorbid CKD was associated with a higher risk for CHD (1.18 to 1.25). The  
25  
26 associations of comorbid CKD with stroke was observed in participants meeting four  
27  
28 criteria only (1.64).  
29  
30  
31  
32  
33  
34  
35  
36  
37  
38  
39  
40  
41  
42

## 43 Discussion

44  
45 In this population-based cohort study of participants with type 2 diabetes and CKD  
46  
47 stages 3 to 4, MRFC was associated with lower relative risks for mortality ( $N>11,000$ )  
48  
49 and cardiovascular diseases ( $N>7,000$ ). We also confirmed that CKD was associated  
50  
51 with increased risks for mortality and cardiovascular events. Higher absolute risks for  
52  
53  
54  
55  
56  
57  
58  
59  
60

1  
2  
3  
4  
5  
6 mortality and cardiovascular events and great relative risk reduction associated with  
7  
8 MRFC suggest that the MRFC strategy may be one of the main approaches to  
9  
10  
11 potentially reducing the burden of diabetes and CKD.  
12  
13  
14  
15

16  
17 This study evaluated the effectiveness of MRFC in patients with type 2 diabetes  
18  
19 according to presence or absence of CKD in clinical practice. So far, the associations of  
20  
21 MRFC with lower risks for mortality and cardiovascular events have been shown in  
22  
23 people with diabetes, not focusing on CKD status. Participants with controlled three risk  
24  
25 factors of HbA1c, blood pressure, and LDL cholesterol had 62% and 60% risk reduction  
26  
27 for cardiovascular events and CHD, respectively, in patients with diabetes without  
28  
29 known cardiovascular diseases [10]. The associations of uncontrolled HbA1c, blood  
30  
31 pressure, LDL cholesterol, and smoking with mortality and cardiovascular events were  
32  
33 individually evaluated in a large population-based study with >850,000 participants  
34  
35 with diabetes [11]. The study cohort included 35.5% of participants with CKD in those  
36  
37 with cardiovascular diseases and 21.8% in those without, and CKD was included in the  
38  
39 analyses for adjustment. This study suggested that uncontrolled risk factors attributed to  
40  
41 about 1 in 3 major cardiovascular events and fewer 1 in 10 deaths.  
42  
43  
44  
45  
46  
47  
48  
49  
50  
51  
52  
53  
54  
55  
56  
57  
58  
59  
60



1  
2  
3  
4  
5  
6 The strength of this study was the inclusion of a large size of >11,000 participants with  
7  
8 diabetes and CKD with an observation of >62,000 person-years. In addition to the large  
9  
10 sample size and long-term follow-up, representativeness from general population and  
11  
12 data quality are also advantages of the CPRD [14], which should remain even if linked  
13  
14 data for HES and ONS are only available for England practices. Instead, linked data for  
15  
16 hospital care and death registration substantially enhanced the validity of the study to  
17  
18 evaluate mortality and cardiovascular events.  
19  
20  
21  
22  
23  
24  
25  
26  
27

28 There are also some limitations in this study. First, despite our focus on the number of  
29  
30 MRFC, the impacts of each component of MRFC on mortality and cardiovascular  
31  
32 events were different. Different cut-off points for HbA1c, blood pressure, and total  
33  
34 cholesterol may bring different results. Next, we could not conclude that associations  
35  
36 represented causal relationships between MRFC and mortality and cardiovascular  
37  
38 events in this non-randomised study. There is a possibility of confounding if healthier  
39  
40 participants were managed more successfully and this resulted in being categorised as  
41  
42 those with greater number of risk factors controlled. For example, stringent  
43  
44 management of HbA1c might not be targeted for vulnerable participants due to concerns  
45  
46 for greater risk of hypoglycaemia, a form of confounding by contra-indication. We  
47  
48  
49  
50  
51  
52  
53  
54  
55  
56  
57  
58  
59  
60

1  
2  
3  
4  
5  
6 cannot exclude the possibility of residual confounding despite adjustment with a range  
7  
8  
9 of covariates in the analyses, including physical activity and alcohol intake [26,27].  
10  
11 Then, measurement and assay methods for HbA1c, blood pressure, cholesterol and  
12  
13 serum creatinine might not have been standardised among general practices or  
14  
15 laboratories. As well as missing data on ethnicity and fluctuations in serum creatinine  
16  
17 values, these methodological limitations might influence the determination of CKD  
18  
19 status or staging. Finally, although we used one of the largest primary care electronic  
20  
21 health records database, it seemed to be insufficient to separately evaluate MRFC for  
22  
23 participants with different stages of CKD. Further research is needed to focus on  
24  
25 patients with more advanced CKD who may have altered risk-benefit profile compared  
26  
27 with patients with less impaired renal function.  
28  
29  
30  
31  
32  
33  
34  
35  
36  
37  
38  
39

40 In summary, based on the population-based cohort study of routine clinical practices,  
41  
42 MRFC may lower the increased risks for mortality and cardiovascular events in people  
43  
44 with diabetes and CKD. Further research is needed to evaluate appropriateness of  
45  
46 MRFC according to individual participants' health status for improved management of  
47  
48 cardiovascular risks in this population.  
49  
50  
51  
52  
53  
54  
55  
56  
57  
58  
59  
60

## Acknowledgments

SH was supported by the Uehara Memorial Foundation Postdoctoral Fellowship, Tokyo, Japan. MCG was supported by the National Institute for Health Research (NIHR) Biomedical Research Centre at Guy's and St Thomas' NHS Foundation Trust and King's College London. This study is based on data from the CPRD obtained under license from the UK Medicines and Healthcare products Regulatory Agency. However, the interpretation and conclusions contained in this report are those of the authors alone and not necessarily those of the National Health Service, the NIHR or the Department of Health.

**Contributors:** Both authors contributed to conception and study design of the study, data acquisition, statistical analysis, and interpretation. SH drafted the manuscript and MCG revised it critically for important intellectual content.

**Funding:** This research received no specific grant from any funding agency.

**Competing interests:** None declared.

**Provenance and peer review:** Not commissioned; externally peer reviewed.

**Data sharing statement:** No additional data are available.

## References

1. GBD 2013 Mortality and Causes of Death Collaborators. Global, regional, and national age-sex specific all-cause and cause-specific mortality for 240 causes of death, 1990-2013: a systematic analysis for the Global Burden of Disease Study 2013. *Lancet*. 2015;385(9963):117-171.
2. Seuring T, Archangelidi O, Suhrcke M. The Economic Costs of Type 2 Diabetes: A Global Systematic Review. *Pharmacoeconomics*. 2015;33(8):811-831.
3. Kerr M, Bray B, Medcalf J, O'Donoghue DJ, Matthews B. Estimating the financial cost of chronic kidney disease to the NHS in England. *Nephrol Dial Transplant*. 2012;27 Suppl 3:iii73-80.
4. Brück K, Stel VS, Gambaro G, Hallan S, Völzke H, Ärnlöv J, et al. CKD Prevalence Varies across the European General Population. *J Am Soc Nephrol*. 2016;27(7):2135-2147.
5. Holman RR, Paul SK, Bethel MA, Matthews DR, Neil HA. 10-year follow-up of intensive glucose control in type 2 diabetes. *N Engl J Med*. 2008;359(15):1577-1589.
6. Go AS, Chertow GM, Fan D, McCulloch CE, Hsu CY. Chronic kidney disease and the risks of death, cardiovascular events, and hospitalization. *N Engl J Med*.

- 1  
2  
3  
4  
5  
6 2004;351(13):1296-1305.  
7  
8  
9 7. Gaede P, Vedel P, Larsen N, Jensen GV, Parving HH, Pedersen O. Multifactorial  
10  
11 intervention and cardiovascular disease in patients with type 2 diabetes. *N Engl J*  
12  
13  
14 *Med.* 2003;348(5):383-393.  
15  
16  
17 8. Gaede P, Lund-Andersen H, Parving HH, Pedersen O. Effect of a multifactorial  
18  
19 intervention on mortality in type 2 diabetes. *N Engl J Med.* 2008;358(6):580-591.  
20  
21  
22 9. Wong ND, Patao C, Wong K, Malik S, Franklin SS, Iloeje U. Trends in control of  
23  
24 cardiovascular risk factors among US adults with type 2 diabetes from 1999 to  
25  
26 2010: comparison by prevalent cardiovascular disease status. *Diab Vasc Dis Res.*  
27  
28 2013;10(6):505-513.  
29  
30  
31  
32  
33 10. Wong ND, Zhao Y, Patel R, Patao C, Malik S, Bertoni AG, et al. Cardiovascular  
34  
35 Risk Factor Targets and Cardiovascular Disease Event Risk in Diabetes: A  
36  
37 Pooling Project of the Atherosclerosis Risk in Communities Study, Multi-Ethnic  
38  
39 Study of Atherosclerosis, and Jackson Heart Study. *Diabetes Care.*  
40  
41 2016;39(5):668-676.  
42  
43  
44  
45  
46  
47  
48 11. Vazquez-Benitez G, Desai JR, Xu S, Goodrich GK, Schroeder EB, Nichols GA, et  
49  
50 al. Preventable major cardiovascular events associated with uncontrolled glucose,  
51  
52 blood pressure, and lipids and active smoking in adults with diabetes with and  
53  
54  
55  
56  
57  
58  
59  
60

- 1  
2  
3  
4  
5  
6 without cardiovascular disease: a contemporary analysis. *Diabetes Care*.  
7  
8  
9 2015;38(5):905-912.  
10  
11 12. Cea Soriano L, Johansson S, Stefansson B, Rodríguez LA. Cardiovascular events  
12  
13 and all-cause mortality in a cohort of 57,946 patients with type 2 diabetes:  
14  
15 associations with renal function and cardiovascular risk factors. *Cardiovasc*  
16  
17 *Diabetol*. 2015;14:38.  
18  
19  
20  
21  
22 13. Konstantinidis I, Nadkarni GN, Yacoub R, Saha A, Simoes P, Parikh CR, et al.  
23  
24 Representation of Patients With Kidney Disease in Trials of Cardiovascular  
25  
26 Interventions: An Updated Systematic Review. *JAMA Intern Med*.  
27  
28 2016;176(1):121-124.  
29  
30  
31  
32  
33 14. Herrett E, Gallagher AM, Bhaskaran K, Forbes H, Mathur R, van Staa T, et al.  
34  
35 Data Resource Profile: Clinical Practice Research Datalink (CPRD). *Int J*  
36  
37 *Epidemiol*. 2015;44(3):827-836.  
38  
39  
40  
41  
42 15. Nicholas J, Charlton J, Dregan A, Gulliford MC. Recent HbA1c values and  
43  
44 mortality risk in type 2 diabetes. population-based case-control study. *PLoS One*.  
45  
46 2013;8(7):e68008.  
47  
48  
49  
50  
51 16. Adamsson Eryd S, Gudbjörnsdottir S, Manhem K, Rosengren A, Svensson AM,  
52  
53 Miftaraj M, et al. Blood pressure and complications in individuals with type 2  
54  
55  
56  
57  
58  
59  
60

- 1  
2  
3  
4  
5  
6 diabetes and no previous cardiovascular disease: national population based cohort  
7  
8  
9 study. *BMJ*. 2016;354:i4070.
- 10  
11 17. Levey AS, Stevens LA, Schmid CH, Zhang YL, Castro AF 3rd, Feldman HI, et al.  
12  
13  
14 A new equation to estimate glomerular filtration rate. *Ann Intern Med*.  
15  
16 2009;150(9):604-612.
- 17  
18  
19 18. Kontopantelis E, Springate DA, Reeves D, Ashcroft DM, Rutter MK, Buchan I, et  
20  
21  
22 al. Glucose, blood pressure and cholesterol levels and their relationships to  
23  
24  
25 clinical outcomes in type 2 diabetes: a retrospective cohort study. *Diabetologia*.  
26  
27  
28 2015;58(3):505-518.
- 29  
30  
31 19. Afghahi H, Svensson MK, Pirouzifard M, Eliasson B, Svensson AM. Blood  
32  
33  
34 pressure level and risk of major cardiovascular events and all-cause of mortality in  
35  
36  
37 patients with type 2 diabetes and renal impairment: an observational study from  
38  
39  
40 the Swedish National Diabetes Register. *Diabetologia*. 2015;58(6):1203-1211.
- 41  
42  
43 20. Herrington W, Staplin N, Judge PK, Mafham M, Emberson J, Haynes R, et al.  
44  
45  
46 Evidence for Reverse Causality in the Association Between Blood Pressure and  
47  
48  
49 Cardiovascular Risk in Patients With Chronic Kidney Disease. *Hypertension*.  
50  
51  
52 2017;69(2):314-322.
- 53  
54 21. Weiner DE, Sarnak MJ. Managing dyslipidemia in chronic kidney disease. *J Gen*  
55  
56  
57  
58  
59  
60

- 1  
2  
3  
4  
5  
6 *Intern Med.* 2004;19(10):1045-1052.
- 7  
8  
9 22. Gulliford MC, Charlton J, Ashworth M, Rudd AG, Toschke AM; eCRT Research  
10  
11 Team. Selection of medical diagnostic codes for analysis of electronic patient  
12  
13 records. Application to stroke in a primary care database. *PLoS One.*  
14  
15 2009;4(9):e7168.  
16  
17  
18  
19 23. Bhattarai N, Charlton J, Rudisill C, Gulliford MC. Coding, recording and  
20  
21 incidence of different forms of coronary heart disease in primary care. *PLoS One.*  
22  
23 2012;7(1):e29776.  
24  
25  
26  
27  
28 24. Austin PC, Lee DS, Fine JP. Introduction to the Analysis of Survival Data in the  
29  
30 Presence of Competing Risks. *Circulation.* 2016;133(6):601-609.  
31  
32  
33  
34 25. Gordon M, Lumley T. Advanced Forest Plot Using 'grid' Graphics. Vienna: The  
35  
36 Comprehensive R Archive Network, 2016.  
37  
38  
39 26. Anand SS, Islam S, Rosengren A, Franzosi MG, Steyn K, Yusufali AH, et al. Risk  
40  
41 factors for myocardial infarction in women and men: insights from the  
42  
43 INTERHEART study. *Eur Heart J.* 2008;29(7):932-940.  
44  
45  
46  
47  
48 27. O'Donnell MJ, Xavier D, Liu L, Zhang H, Chin SL, Rao-Melacini P, et al. Risk  
49  
50 factors for ischaemic and intracerebral haemorrhagic stroke in 22 countries (the  
51  
52 INTERSTROKE study): a case-control study. *Lancet.* 2010;376(9735):112-123.  
53  
54  
55  
56  
57  
58  
59  
60



1  
2  
3  
4  
5  
6  
7  
8  
9  
10  
11  
12  
13  
14  
15  
16  
17  
18  
19  
20  
21  
22  
23  
24  
25  
26  
27  
28  
29  
30  
31  
32  
33  
34  
35  
36  
37  
38  
39  
40  
41  
42  
43  
44  
45  
46  
47  
48  
49  
50  
51  
52  
53  
54  
55  
56  
57  
58  
59  
60

For peer review only

**Table 1.** Baseline characteristics of the study cohort by CKD status

|                                                 |                    | CKD<br>(N=11,431) | Non-CKD<br>(N=36,429) | P value |
|-------------------------------------------------|--------------------|-------------------|-----------------------|---------|
| Age (years)                                     | Mean (SD)          | 71 (6)            | 62 (9)                | <0.001  |
| Gender                                          | Male               | 5,481 (48)        | 22,006 (60)           | <0.001  |
|                                                 | Female             | 5,950 (52)        | 14,423 (40)           |         |
| eGFR (mL/min/1.73 m <sup>2</sup> )              | Mean (SD)          | 49 (9)            | 81 (13)               | –       |
|                                                 | 15–29              | 558 (5)           | –                     |         |
|                                                 | 30–44              | 2,655 (23)        | –                     |         |
|                                                 | 45–59              | 8,218 (72)        | –                     |         |
| Smoking status                                  | Non-smoker         | 5,426 (47)        | 16,511 (45)           | <0.001  |
|                                                 | Ex-smoker          | 4,327 (38)        | 12,217 (34)           |         |
|                                                 | Current smoker     | 1,678 (15)        | 7,701 (21)            |         |
| BMI (kg/m <sup>2</sup> )                        | 18.5–24.9          | 1,459 (13)        | 4,097 (11)            | <0.001  |
|                                                 | 25.0–29.9          | 4,329 (38)        | 13,054 (36)           |         |
|                                                 | 30.0–34.9          | 3,527 (31)        | 11,485 (32)           |         |
|                                                 | 35.0–39.9          | 1,541 (13)        | 5,454 (15)            |         |
|                                                 | 40.0–44.9          | 575 (5)           | 2,339 (6)             |         |
| Deprivation level (quintile)                    | 1 (least deprived) | 1,508 (13)        | 4,785 (13)            | 0.293   |
|                                                 | 2                  | 2,331 (20)        | 7,300 (20)            |         |
|                                                 | 3                  | 2,374 (21)        | 7,640 (21)            |         |
|                                                 | 4                  | 2,637 (23)        | 8,172 (22)            |         |
|                                                 | 5 (most deprived)  | 2,581 (23)        | 8,532 (23)            |         |
| Duration of diabetes (years)                    | 1.0–4.9            | 5,208 (46)        | 22,527 (62)           | <0.001  |
|                                                 | 5.0–9.9            | 2,954 (26)        | 8,356 (23)            |         |
|                                                 | ≥10.0              | 3,269 (29)        | 5,546 (15)            |         |
| Proteinuria                                     | Yes                | 1,714 (15)        | 3,279 (9)             | <0.001  |
|                                                 | No                 | 7,666 (67)        | 24,110 (66)           |         |
|                                                 | Missing            | 2,051 (18)        | 9,040 (25)            |         |
| History of coronary heart disease and/or stroke |                    | 4,215 (37)        | 7,860 (22)            | <0.001  |
| HbA <sub>1c</sub> (mmol/mol/%)                  | 42–47 (6.0–6.4)*   | 1,307 (11)        | 3,513 (10)            | <0.001  |
|                                                 | 48–52 (6.5–6.9)    | 3,041 (27)        | 8,900 (24)            |         |
|                                                 | 53–57 (7.0–7.4)    | 2,590 (23)        | 7,781 (21)            |         |
|                                                 | 58–63 (7.5–7.9)    | 1,709 (15)        | 5,461 (15)            |         |

1  
2  
3  
4  
5  
6  
7  
8  
9  
10  
11  
12  
13  
14  
15  
16  
17  
18  
19  
20  
21  
22  
23  
24  
25  
26  
27  
28  
29  
30  
31  
32  
33  
34  
35  
36  
37  
38  
39  
40  
41  
42  
43  
44  
45  
46  
47  
48  
49  
50  
51  
52  
53  
54  
55  
56  
57  
58  
59  
60

|                                 |  |                                              |            |             |        |
|---------------------------------|--|----------------------------------------------|------------|-------------|--------|
|                                 |  | 64–68 (8.0–8.4)                              | 1,038 (9)  | 3,567 (10)  |        |
|                                 |  | ≥69 (≥8.5)                                   | 1,746 (15) | 7,207 (20)  |        |
| Systolic blood pressure (mmHg)  |  | 120–129                                      | 1,777 (16) | 7,203 (20)  | <0.001 |
|                                 |  | 130–139                                      | 3,508 (31) | 12,121 (33) |        |
|                                 |  | 140–149                                      | 3,387 (30) | 10,242 (28) |        |
|                                 |  | ≥150                                         | 2,759 (24) | 6,863 (19)  |        |
| Diastolic blood pressure (mmHg) |  | 60–79                                        | 7,238 (63) | 16,803 (46) | <0.001 |
|                                 |  | 80–89                                        | 3,599 (31) | 15,816 (43) |        |
|                                 |  | ≥90                                          | 594 (5)    | 3,810 (10)  |        |
| Total cholesterol (mmol/L)      |  | 3.0–3.9                                      | 3,782 (33) | 10,960 (30) | <0.001 |
|                                 |  | 4.0–4.9                                      | 5,220 (46) | 16,387 (45) |        |
|                                 |  | ≥5.0                                         | 2,429 (21) | 9,082 (25)  |        |
| Medication                      |  | Antidiabetic drugs                           |            |             | <0.001 |
|                                 |  | Insulin (± non-insulin)                      | 1,805 (16) | 3,225 (9)   |        |
|                                 |  | Non-insulin only                             | 7,722 (68) | 26,753 (73) |        |
|                                 |  | Antihypertensive drugs                       |            |             | <0.001 |
|                                 |  | Drugs on renin-angiotensin system (± others) | 8,472 (74) | 21,535 (59) |        |
|                                 |  | Other antihypertensive drugs only            | 1,610 (14) | 4,751 (13)  |        |
|                                 |  | Statins                                      | 9,004 (79) | 27,011 (74) | <0.001 |
|                                 |  | Antiplatelet drugs                           | 6,440 (56) | 16,375 (45) | <0.001 |
| Index year                      |  | 2006                                         | 9,091 (80) | 24,192 (66) | <0.001 |
|                                 |  | 2007                                         | 1,008 (9)  | 3,741 (10)  |        |
|                                 |  | 2008                                         | 545 (5)    | 2,880 (8)   |        |
|                                 |  | 2009                                         | 432 (4)    | 2,677 (7)   |        |
|                                 |  | 2010                                         | 355 (3)    | 2,939 (8)   |        |

BMI, body mass index; CKD, chronic kidney disease; eGFR, estimated glomerular filtration rate

Frequencies (percentages) are shown otherwise specified.

\* Participants with HbA1c <48 mmol/mol (<6.5%) were only included if they were prescribed antidiabetic drugs.

**Table 2.** Risk factors controlled according to chronic kidney disease and a history of cardiovascular diseases

|                                          | CKD                 |                     |                  | Non-CKD             |                      |                  |
|------------------------------------------|---------------------|---------------------|------------------|---------------------|----------------------|------------------|
|                                          | Total<br>(N=11,431) | No CVD<br>(N=7,216) | CVD<br>(N=4,215) | Total<br>(N=36,429) | No CVD<br>(N=28,569) | CVD<br>(N=7,860) |
| <i>Individual risk factor controlled</i> |                     |                     |                  |                     |                      |                  |
| HbA1c <53 mmol/mol (<7.0%)               | 4,348 (38)          | 2,767 (38)          | 1,581 (38)       | 12,413 (34)         | 9,603 (34)           | 2,810 (36)       |
| Blood pressure <140 & <90 mmHg           | 5,224 (46)          | 3,147 (44)          | 2,077 (49)       | 18,655 (51)         | 14,438 (51)          | 4,217 (54)       |
| Total cholesterol <5 mmol/L              | 9,002 (79)          | 5,512 (76)          | 3,490 (83)       | 27,347 (75)         | 20,826 (73)          | 6,521 (83)       |
| No smoking                               | 9,753 (85)          | 6,193 (86)          | 3,560 (84)       | 28,728 (79)         | 22,565 (79)          | 6,163 (78)       |
| <i>Number of risk factors controlled</i> |                     |                     |                  |                     |                      |                  |
| 0                                        | 138 (1)             | 87 (1)              | 51 (1)           | 806 (2)             | 678 (2)              | 128 (2)          |
| 1                                        | 1,427 (12)          | 971 (13)            | 456 (11)         | 5,372 (15)          | 4,421 (15)           | 951 (12)         |
| 2                                        | 4,162 (36)          | 2,693 (37)          | 1,469 (35)       | 13,288 (36)         | 10,602 (37)          | 2,686 (34)       |
| 3                                        | 4,240 (37)          | 2,598 (36)          | 1,642 (39)       | 12,657 (35)         | 9,665 (34)           | 2,992 (38)       |
| 4                                        | 1,464 (13)          | 867 (12)            | 597 (14)         | 4,306 (12)          | 3,203 (11)           | 1,103 (14)       |

CKD, chronic kidney disease; CVD, (a history of) cardiovascular diseases

Frequencies (percentages) are shown.

## Figure legends

**Figure 1.** Relative hazards of the number of risk factors controlled for mortality and cardiovascular events in (a) participants with chronic kidney disease (CKD) and (b) participants with non-CKD. Hazard ratios (HRs) for all-cause mortality and subdistribution hazard ratios (SHRs) for cardiovascular mortality, coronary heart disease, and stroke were adjusted for age, gender, CKD stage (for CKD cohort), body mass index, deprivation level, duration of diabetes, proteinuria status, a history of cardiovascular diseases (for mortality evaluation), prescribing of antidiabetic, antihypertensive, statins and antiplatelet drugs, and index year.

**Figure 2.** Relative hazards of presence of chronic kidney disease for mortality and cardiovascular events compared with non-CKD as reference. Hazard ratios (HRs) for all-cause mortality and subdistribution hazard ratios (SHRs) for cardiovascular mortality, coronary heart disease, and stroke were adjusted for age, gender, body mass index, deprivation level, duration of diabetes, proteinuria status, a history of cardiovascular diseases (for mortality evaluation), prescribing of antidiabetic, antihypertensive, statins and antiplatelet drugs, and index year.

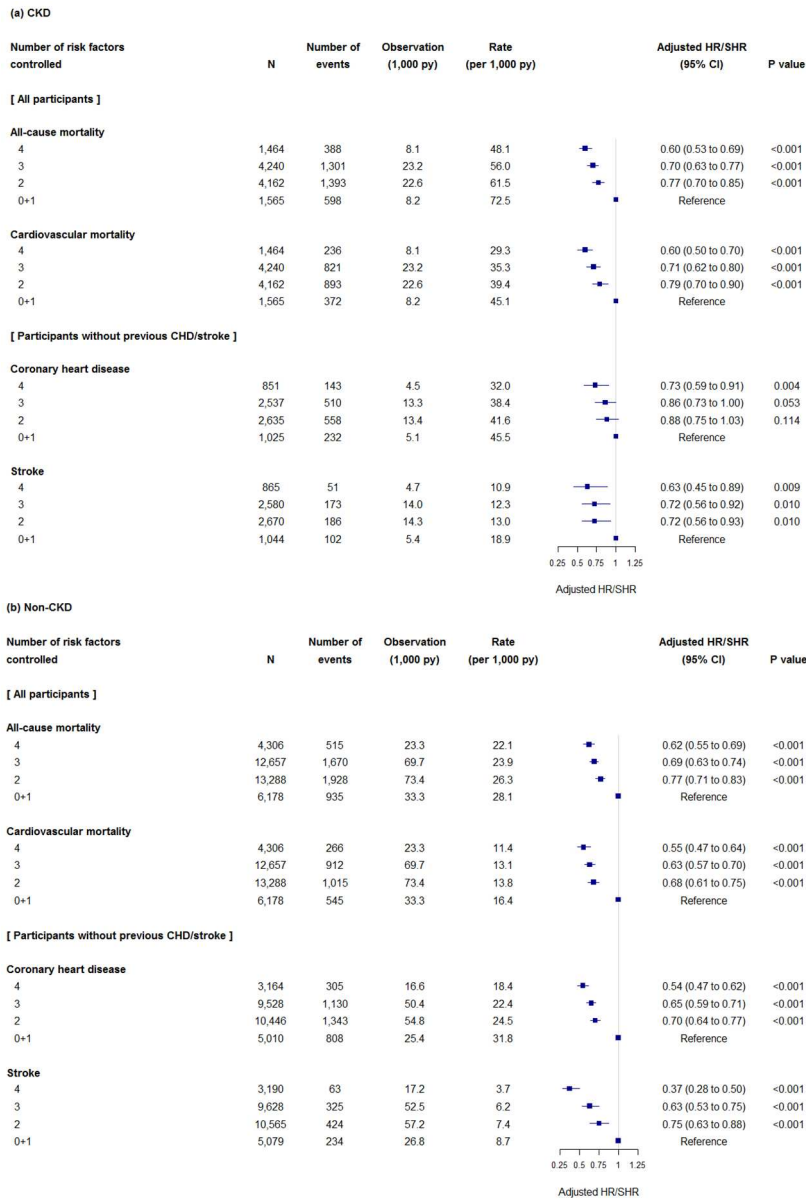

figure1

105x156mm (300 x 300 DPI)

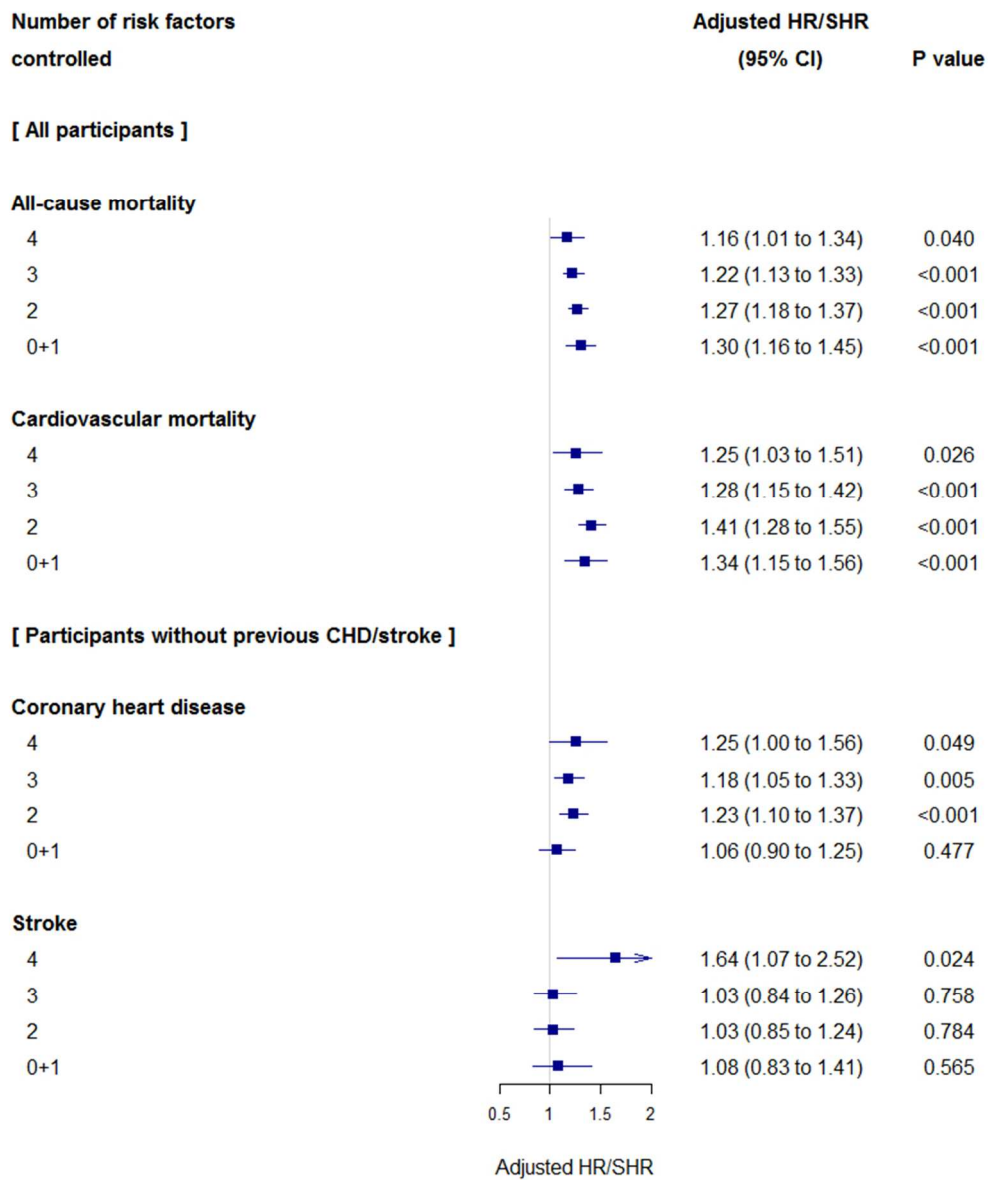

figure2

66x78mm (300 x 300 DPI)

## SUPPLEMENTARY MATERIAL

Figure S1. Study cohort selection

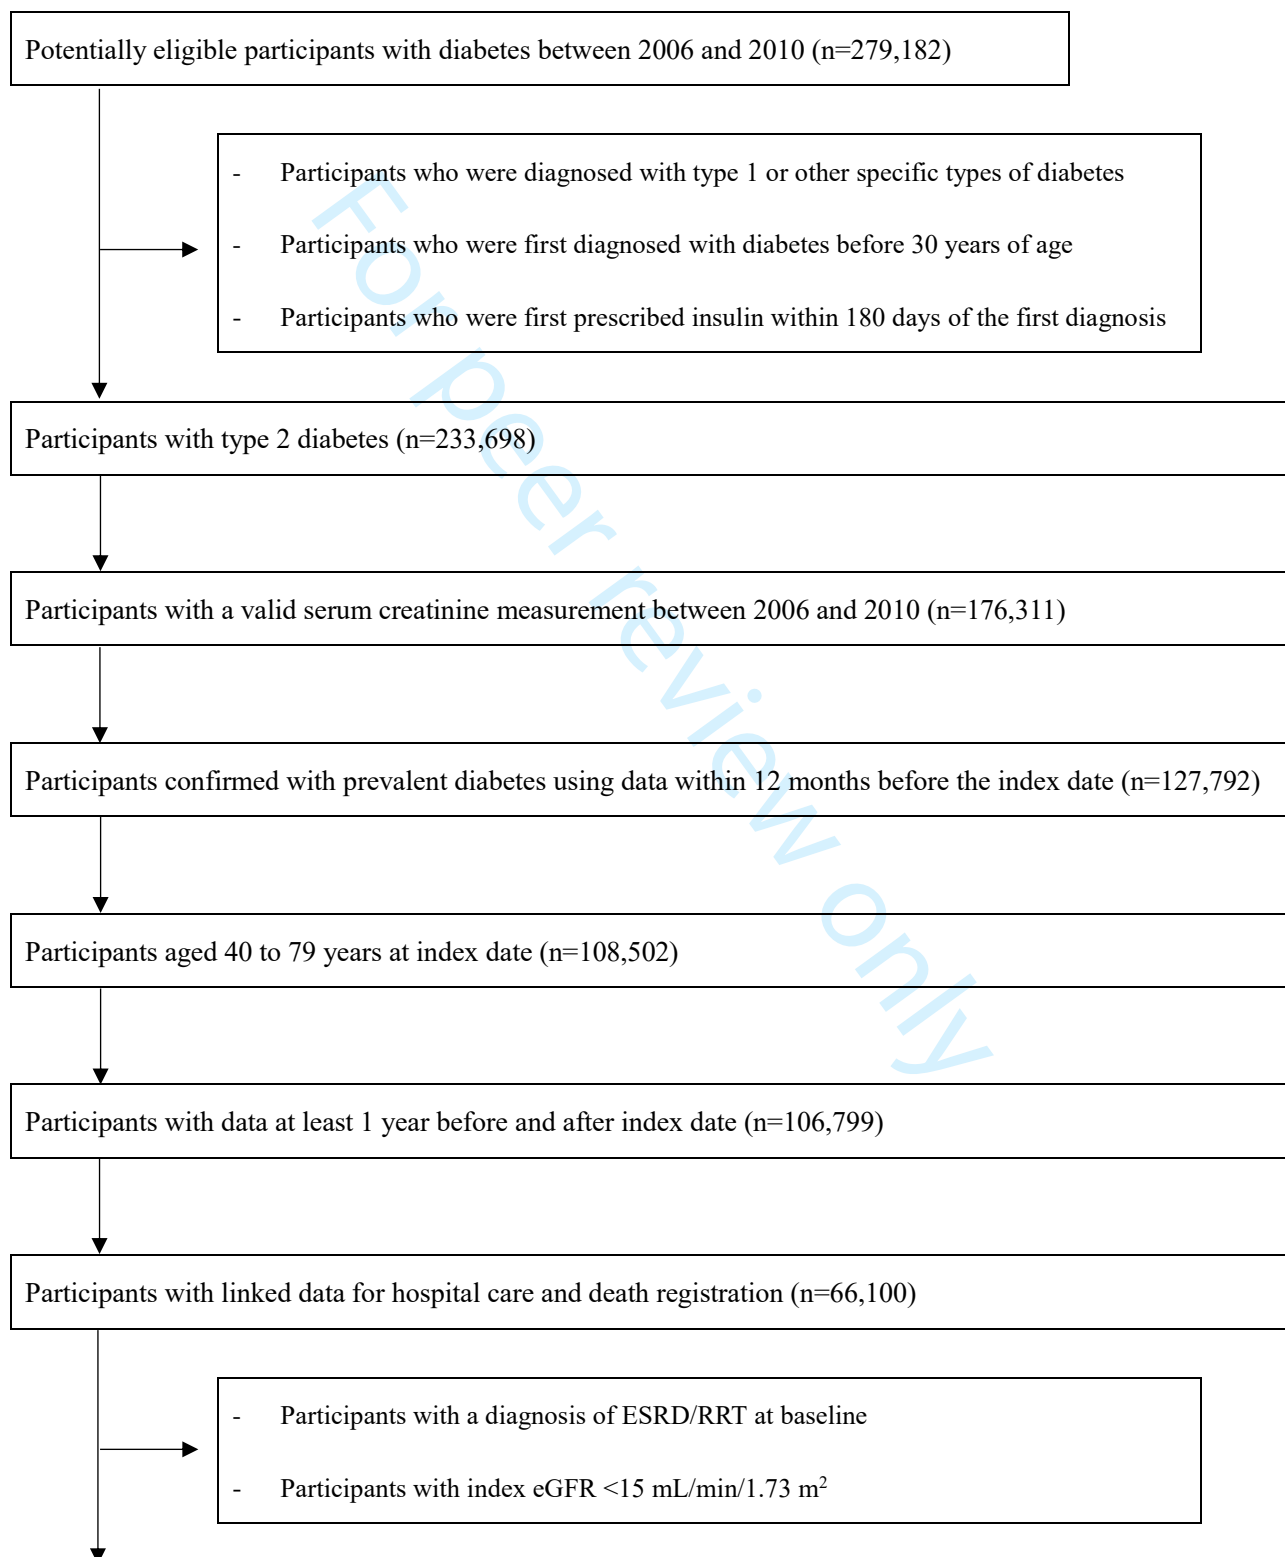



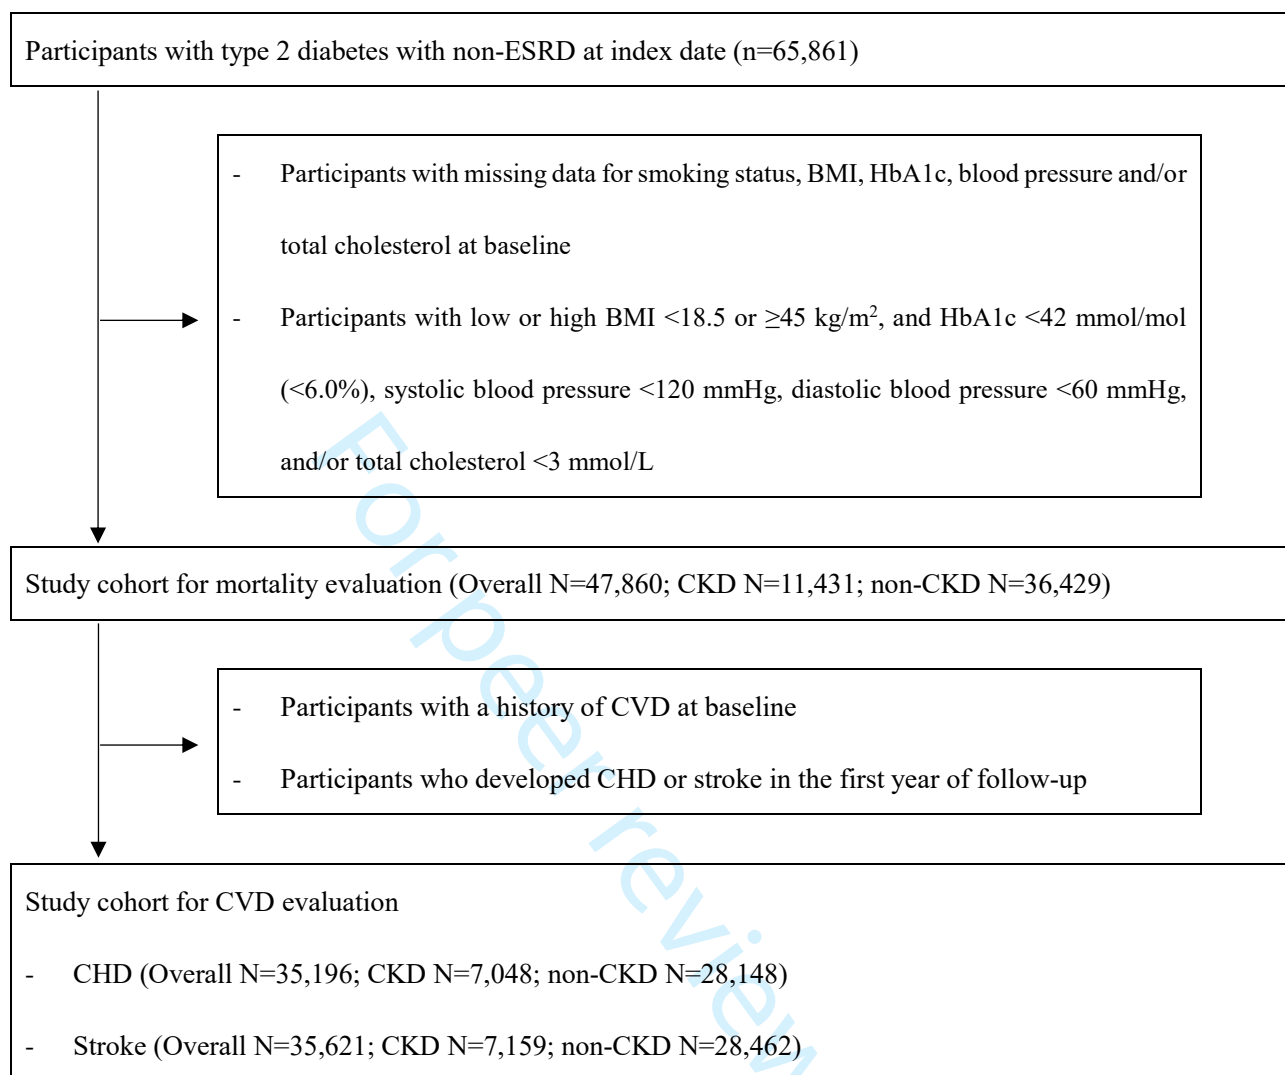

BMI, body mass index; CKD, chronic kidney disease; CHD, coronary heart disease; CVD, Cardiovascular diseases; eGFR, estimated glomerular filtration rate; ESRD, end-stage renal disease; RRT, renal replacement therapy

**Table S1.** Breakdown of risk factors controlled according to chronic kidney disease and a history of cardiovascular diseases

| Number of risk factors controlled | HbA1c <53 mmol/mol (<7.0%) | Blood pressure <140/90 mmHg | Total cholesterol <5 mmol/L | No smoking | CKD (N=11,431)     |                  |               | Non-CKD (N=36,429) |                   |               |
|-----------------------------------|----------------------------|-----------------------------|-----------------------------|------------|--------------------|------------------|---------------|--------------------|-------------------|---------------|
|                                   |                            |                             |                             |            | Overall (N=11,431) | No CVD (N=7,216) | CVD (N=4,215) | Overall (N=36,429) | No CVD (N=28,569) | CVD (N=7,860) |
| 0                                 | –                          | –                           | –                           | –          | 138 (1)            | 87 (1)           | 51 (1)        | 806 (2)            | 678 (2)           | 128 (2)       |
| 1                                 | Y                          | –                           | –                           | –          | 69 (0.6)           | 46 (0.6)         | 23 (0.6)      | 312 (1)            | 260 (0.9)         | 52 (0.7)      |
|                                   | –                          | Y                           | –                           | –          | 89 (0.8)           | 64 (0.9)         | 25 (0.6)      | 759 (2)            | 624 (2)           | 135 (2)       |
| 2                                 | –                          | –                           | Y                           | –          | 438 (4)            | 264 (4)          | 174 (4)       | 1,742 (5)          | 1,350 (5)         | 392 (5)       |
|                                   | –                          | –                           | –                           | Y          | 831 (7)            | 597 (8)          | 234 (6)       | 2,559 (7)          | 2,187 (8)         | 372 (5)       |
|                                   | Y                          | Y                           | –                           | –          | 62 (0.5)           | 43 (0.6)         | 19 (0.5)      | 304 (0.8)          | 268 (0.9)         | 36 (0.5)      |
|                                   | Y                          | –                           | Y                           | –          | 245 (2)            | 152 (2)          | 93 (2)        | 794 (2)            | 590 (2)           | 204 (3)       |
|                                   | Y                          | –                           | –                           | Y          | 407 (4)            | 289 (4)          | 118 (3)       | 1,070 (3)          | 911 (3)           | 159 (2)       |
| 3                                 | –                          | Y                           | Y                           | –          | 390 (3)            | 215 (3)          | 175 (4)       | 1,911 (5)          | 1,446 (5)         | 465 (6)       |
|                                   | –                          | Y                           | –                           | Y          | 531 (5)            | 379 (5)          | 152 (4)       | 2,205 (6)          | 1,910 (7)         | 295 (4)       |
|                                   | –                          | –                           | Y                           | Y          | 2,527 (22)         | 1,615 (22)       | 912 (22)      | 7,004 (19)         | 5,477 (19)        | 1,527 (19)    |
|                                   | Y                          | Y                           | Y                           | –          | 247 (2)            | 152 (2)          | 95 (2)        | 1,073 (3)          | 788 (3)           | 285 (4)       |
|                                   | Y                          | Y                           | –                           | Y          | 302 (3)            | 199 (3)          | 103 (2)       | 1,067 (3)          | 905 (3)           | 162 (2)       |
| 4                                 | Y                          | –                           | Y                           | Y          | 1,552 (14)         | 1,019 (14)       | 533 (13)      | 3,487 (10)         | 2,678 (9)         | 809 (10)      |
|                                   | –                          | Y                           | Y                           | Y          | 2,139 (19)         | 1,228 (17)       | 911 (22)      | 7,030 (19)         | 5,294 (19)        | 1,736 (22)    |
|                                   | Y                          | Y                           | Y                           | Y          | 1,464 (13)         | 867 (12)         | 597 (14)      | 4,306 (12)         | 3,203 (11)        | 1,103 (14)    |

Y, meeting the criterion; –, not meeting the criterion

CKD, chronic kidney disease; CVD, (a history of) cardiovascular diseases

**Figure S2.** Relative hazards of individual risk factors controlled for mortality and cardiovascular events in (a) participants with chronic kidney disease (CKD) and (b) participants with non-CKD. Hazard ratios (HRs) for all-cause mortality and subdistribution hazard ratios (SHRs) for cardiovascular mortality, coronary heart disease, and stroke were adjusted for age, gender, CKD stage (for CKD cohort), body mass index, deprivation level, duration of diabetes, proteinuria status, a history of cardiovascular diseases (for mortality evaluation), prescribing of antidiabetic, antihypertensive, statins and antiplatelet drugs, and index year.

**(a) CKD**

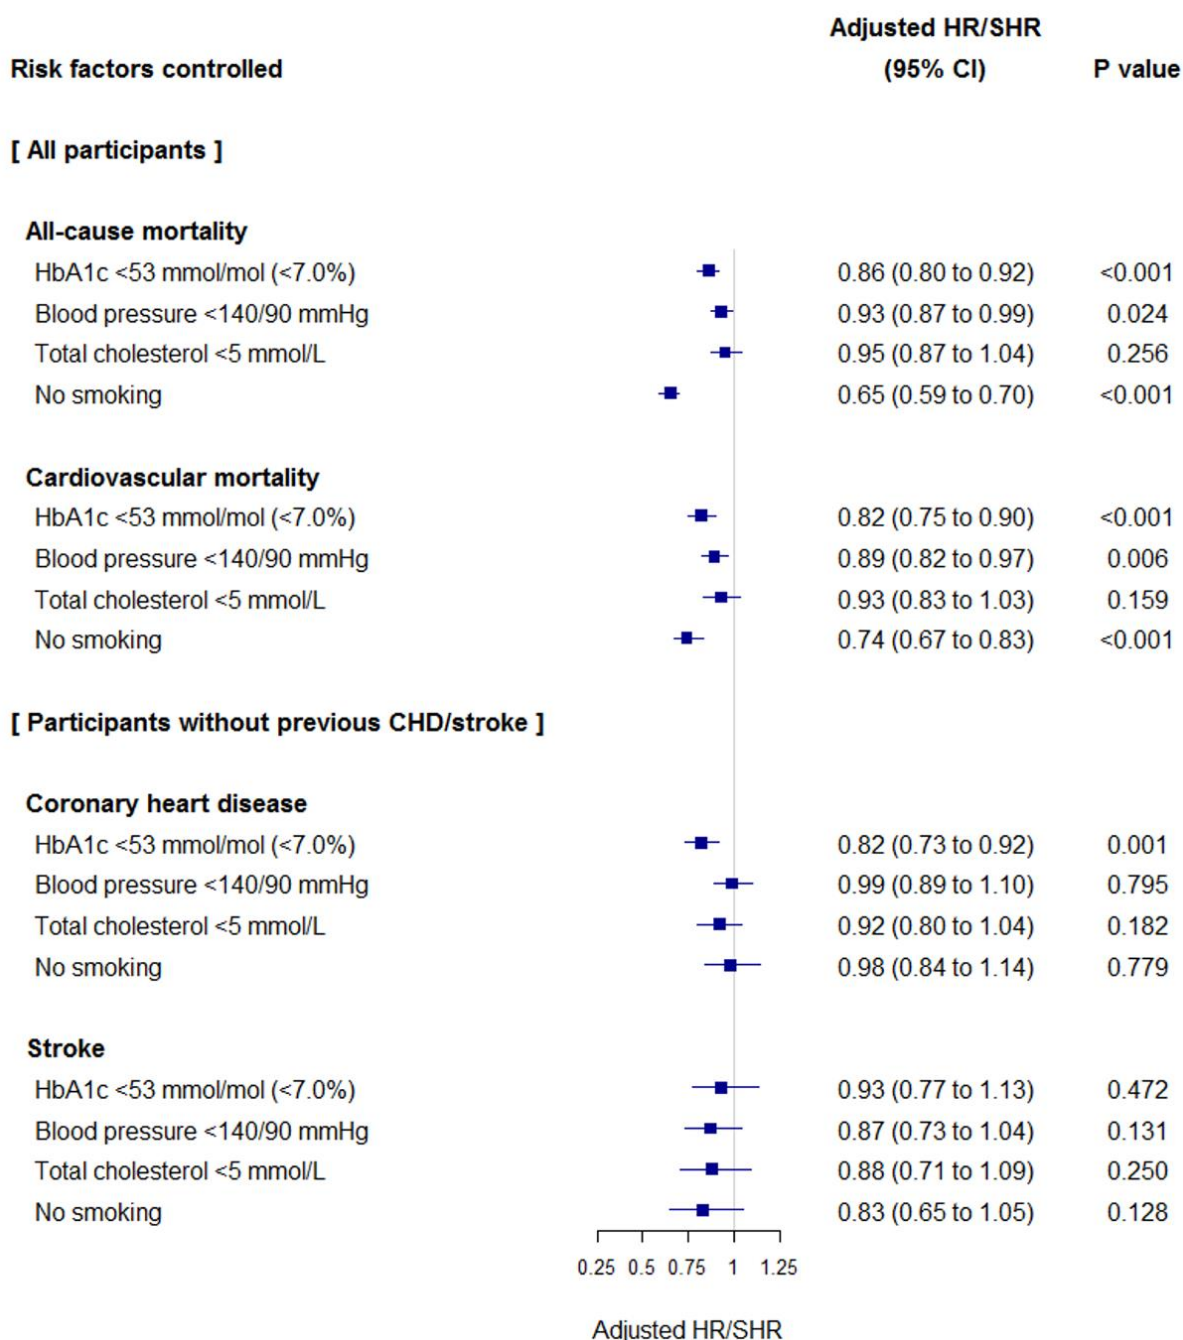

**(b) Non-CKD**

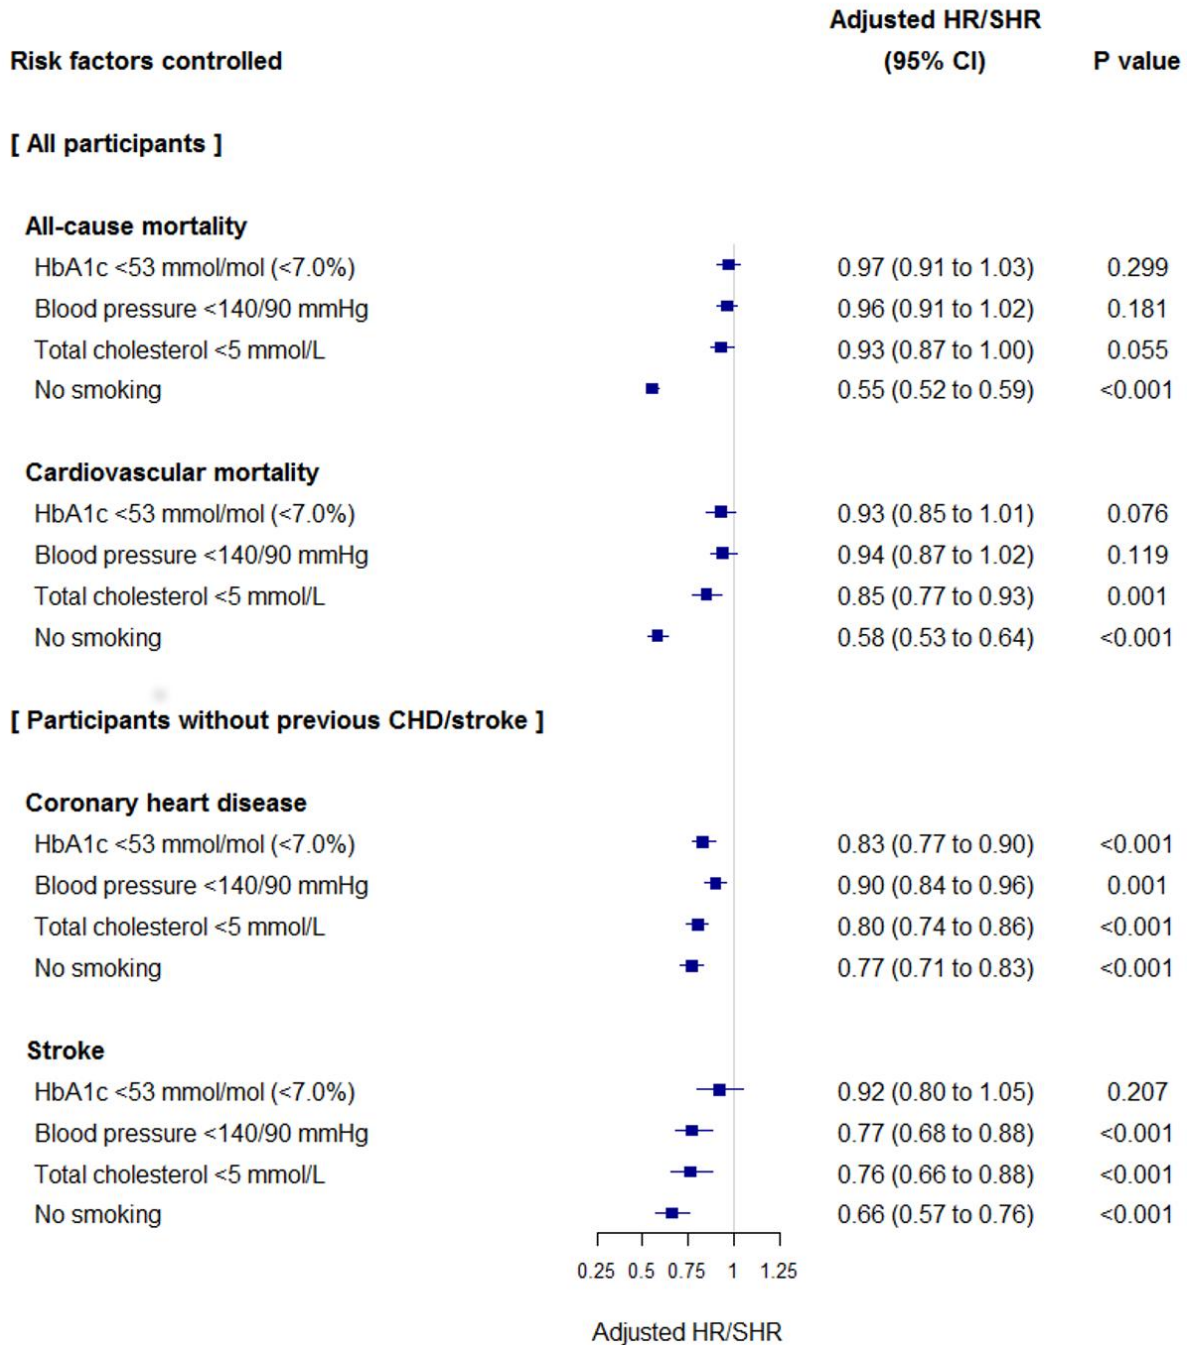

**STROBE 2007 (v4) Statement—Checklist of items that should be included in reports of cohort studies**

| Section/Topic            | Item # | Recommendation                                                                                                                                                                       | Reported on page # |
|--------------------------|--------|--------------------------------------------------------------------------------------------------------------------------------------------------------------------------------------|--------------------|
| Title and abstract       | 1      | (a) Indicate the study’s design with a commonly used term in the title or the abstract                                                                                               | 1,2                |
|                          |        | (b) Provide in the abstract an informative and balanced summary of what was done and what was found                                                                                  | 2,3                |
| <b>Introduction</b>      |        |                                                                                                                                                                                      |                    |
| Background/rationale     | 2      | Explain the scientific background and rationale for the investigation being reported                                                                                                 | 5,6                |
| Objectives               | 3      | State specific objectives, including any prespecified hypotheses                                                                                                                     | 6                  |
| <b>Methods</b>           |        |                                                                                                                                                                                      |                    |
| Study design             | 4      | Present key elements of study design early in the paper                                                                                                                              | 6,7                |
| Setting                  | 5      | Describe the setting, locations, and relevant dates, including periods of recruitment, exposure, follow-up, and data collection                                                      | 6,7                |
| Participants             | 6      | (a) Give the eligibility criteria, and the sources and methods of selection of participants. Describe methods of follow-up                                                           | 7,8,10             |
|                          |        | (b) For matched studies, give matching criteria and number of exposed and unexposed                                                                                                  | NA                 |
| Variables                | 7      | Clearly define all outcomes, exposures, predictors, potential confounders, and effect modifiers. Give diagnostic criteria, if applicable                                             | 9                  |
| Data sources/measurement | 8*     | For each variable of interest, give sources of data and details of methods of assessment (measurement). Describe comparability of assessment methods if there is more than one group | 6-9                |
| Bias                     | 9      | Describe any efforts to address potential sources of bias                                                                                                                            | 10,11              |
| Study size               | 10     | Explain how the study size was arrived at                                                                                                                                            | 6-8                |
| Quantitative variables   | 11     | Explain how quantitative variables were handled in the analyses. If applicable, describe which groupings were chosen and why                                                         | 11                 |
| Statistical methods      | 12     | (a) Describe all statistical methods, including those used to control for confounding                                                                                                | 11                 |
|                          |        | (b) Describe any methods used to examine subgroups and interactions                                                                                                                  | 11                 |
|                          |        | (c) Explain how missing data were addressed                                                                                                                                          | 8,11               |
|                          |        | (d) If applicable, explain how loss to follow-up was addressed                                                                                                                       | 10                 |
|                          |        | (e) Describe any sensitivity analyses                                                                                                                                                | NA                 |
| <b>Results</b>           |        |                                                                                                                                                                                      |                    |

|                          |     |                                                                                                                                                                                                              |                    |
|--------------------------|-----|--------------------------------------------------------------------------------------------------------------------------------------------------------------------------------------------------------------|--------------------|
| Participants             | 13* | (a) Report numbers of individuals at each stage of study—eg numbers potentially eligible, examined for eligibility, confirmed eligible, included in the study, completing follow-up, and analysed            | 12, Figure S1      |
|                          |     | (b) Give reasons for non-participation at each stage                                                                                                                                                         | 12, Figure S1      |
|                          |     | (c) Consider use of a flow diagram                                                                                                                                                                           | Figure S1          |
| Descriptive data         | 14* | (a) Give characteristics of study participants (eg demographic, clinical, social) and information on exposures and potential confounders                                                                     | 12, Table 1        |
|                          |     | (b) Indicate number of participants with missing data for each variable of interest                                                                                                                          | Table 1, Figure S1 |
|                          |     | (c) Summarise follow-up time (eg, average and total amount)                                                                                                                                                  | Figure 1           |
| Outcome data             | 15* | Report numbers of outcome events or summary measures over time                                                                                                                                               | Figure 1           |
| Main results             | 16  | (a) Give unadjusted estimates and, if applicable, confounder-adjusted estimates and their precision (eg, 95% confidence interval). Make clear which confounders were adjusted for and why they were included | 12-15              |
|                          |     | (b) Report category boundaries when continuous variables were categorized                                                                                                                                    | 9, 11              |
|                          |     | (c) If relevant, consider translating estimates of relative risk into absolute risk for a meaningful time period                                                                                             | NA                 |
| Other analyses           | 17  | Report other analyses done—eg analyses of subgroups and interactions, and sensitivity analyses                                                                                                               | NA                 |
| <b>Discussion</b>        |     |                                                                                                                                                                                                              |                    |
| Key results              | 18  | Summarise key results with reference to study objectives                                                                                                                                                     | 13-14              |
| <b>Limitations</b>       |     |                                                                                                                                                                                                              |                    |
| Interpretation           | 20  | Give a cautious overall interpretation of results considering objectives, limitations, multiplicity of analyses, results from similar studies, and other relevant evidence                                   | 15-18              |
| Generalisability         | 21  | Discuss the generalisability (external validity) of the study results                                                                                                                                        | 16-18              |
| <b>Other information</b> |     |                                                                                                                                                                                                              |                    |
| Funding                  | 22  | Give the source of funding and the role of the funders for the present study and, if applicable, for the original study on which the present article is based                                                | 19                 |

\*Give information separately for cases and controls in case-control studies and, if applicable, for exposed and unexposed groups in cohort and cross-sectional studies.

**Note:** An Explanation and Elaboration article discusses each checklist item and gives methodological background and published examples of transparent reporting. The STROBE checklist is best used in conjunction with this article (freely available on the Web sites of PLoS Medicine at <http://www.plosmedicine.org/>, Annals of Internal Medicine at <http://www.annals.org/>, and Epidemiology at <http://www.epidem.com/>). Information on the STROBE Initiative is available at [www.strobe-statement.org](http://www.strobe-statement.org).

# BMJ Open

## Multiple risk factor control, mortality and cardiovascular events in type 2 diabetes and chronic kidney disease: a population-based cohort study

|                                 |                                                                                                                                |
|---------------------------------|--------------------------------------------------------------------------------------------------------------------------------|
| Journal:                        | <i>BMJ Open</i>                                                                                                                |
| Manuscript ID                   | bmjopen-2017-019950.R2                                                                                                         |
| Article Type:                   | Research                                                                                                                       |
| Date Submitted by the Author:   | 26-Mar-2018                                                                                                                    |
| Complete List of Authors:       | Hamada, Shota; Institute for Health Economics and Policy, Research Department<br>Gulliford, Martin; King's College London, UK, |
| <b>Primary Subject Heading</b>: | Diabetes and endocrinology                                                                                                     |
| Secondary Subject Heading:      | General practice / Family practice                                                                                             |
| Keywords:                       | cardiovascular diseases, chronic kidney disease, mortality, type 2 diabetes                                                    |
|                                 |                                                                                                                                |

SCHOLARONE™  
Manuscripts

Peer Review Only

1  
2  
3  
4  
5  
6 **Multiple risk factor control, mortality and cardiovascular events in type 2 diabetes**  
7  
8  
9 **and chronic kidney disease: a population-based cohort study**  
10

11  
12  
13  
14 Shota Hamada<sup>1,2</sup>, Martin C Gulliford<sup>1,3</sup>  
15

16  
17 1 Department of Primary Care and Public Health Sciences, King's College London, London, UK  
18

19  
20 2 Research Department, Institute for Health Economics and Policy, Association for Health  
21  
22 Economics Research and Social Insurance and Welfare, Tokyo, Japan  
23

24  
25 3 National Institute for Health Research Biomedical Research Centre at Guy's and St Thomas'  
26  
27 National Health Service Foundation Trust, London UK  
28  
29

30  
31  
32  
33  
34 Correspondence to: Shota Hamada  
35

36  
37 Research Department, Institute for Health Economics and Policy, Association for Health  
38

39  
40 Economics Research and Social Insurance and Welfare  
41

42 No.11 Toyo-Kaiji Bldg, 1-5-11 Nishi-Shimbashi, Minato-ku, Tokyo, 105-0003 Japan  
43

44  
45 Tel: +81 3-3506-8529, Fax: +81 3-3506-8528, E-mail: [shota.hamada@ihp.jp](mailto:shota.hamada@ihp.jp)  
46  
47  
48  
49  
50  
51  
52  
53  
54  
55  
56



## Abstract

**OBJECTIVES:** This study aimed to evaluate the effectiveness of multiple risk factor control (MRFC) at reducing mortality and cardiovascular events in diabetes and chronic kidney disease (CKD) in clinical practice.

**DESIGN:** Population-based cohort study.

**SETTING:** Primary care database in the UK, linked with inpatient and mortality data.

**PARTICIPANTS:** Participants aged 40 to 79 years with type 2 diabetes and valid serum creatinine measurements, including 11,431 participants with CKD (eGFR 15–59 mL/min/1.73 m<sup>2</sup>) and 36,429 participants with non-CKD (eGFR ≥60 mL/min/1.73 m<sup>2</sup>).

**EXPOSURES:** MRFC consisted of four components: HbA1c <53 mmol/mol (<7.0%), blood pressure <140/90 mmHg, total cholesterol <5 mmol/L, and no smoking. The main exposure variable was the number of risk factors controlled at baseline.

**OUTCOME MEASURES:** All-cause and cardiovascular mortality in the overall participants. Cardiovascular events, including coronary heart disease and stroke, in participants limited to those without a history of cardiovascular diseases at baseline.

**RESULTS:** In participants with CKD, 37% or 13% met three or four MRFC criteria, respectively. Increasing numbers of risk factors controlled were associated with lower relative hazards for all outcomes studied compared with those meeting no or one

1  
2  
3  
4  
5  
6 criterion. For participants with CKD meeting four criteria, the adjusted hazard ratio  
7  
8 (HR) for all-cause mortality was 0.60 (95% confidence interval (CI) 0.53 to 0.69) and  
9  
10 the adjusted subdistribution HR for cardiovascular mortality was 0.60 (0.50 to 0.70),  
11  
12 considering a competing risk of non-cardiovascular death. Participants meeting four  
13  
14 criteria also had lower relative hazards for coronary heart disease (adjusted  
15  
16 subdistribution HR 0.73, 95% CI 0.59 to 0.91) and stroke (0.63, 0.45 to 0.89),  
17  
18 considering death as a competing risk.  
19  
20  
21  
22  
23

24  
25 **CONCLUSIONS:** MRFC may lower the increased risks for mortality and  
26  
27 cardiovascular events in people with diabetes and CKD. Further research is needed to  
28  
29 evaluate appropriateness of MRFC according to individual participants' health status for  
30  
31 improved management of cardiovascular risks in this population.  
32  
33  
34  
35  
36  
37  
38  
39

#### 40 **Strengths and limitations of this study**

- 41  
42 • This study included a large number of participants with type 2 diabetes and CKD  
43  
44 sampled from a representative general population with about 6 years of follow-up,  
45  
46 which enabled to determine the associations of cardiovascular risk factors with  
47  
48 mortality and cardiovascular events.  
49  
50
- 51  
52 • Linked data for diagnostic data in hospitals and death registration with a primary  
53  
54  
55  
56

1  
2  
3  
4  
5  
6 care database enhanced the validity of the study to evaluate mortality and  
7  
8 cardiovascular events.  
9

- 10  
11 • We could not conclude that associations represented causal relationships between  
12  
13 MRFC and mortality and cardiovascular events in this non-randomised study.  
14  
15
- 16  
17 • There is a possibility of confounding if healthier participants were managed more  
18  
19 successfully and this resulted in being categorised as those with greater number of  
20  
21 risk factors controlled.  
22  
23  
24  
25  
26  
27  
28  
29  
30  
31  
32  
33  
34  
35  
36  
37  
38  
39  
40  
41  
42  
43  
44  
45  
46  
47  
48  
49  
50  
51  
52  
53  
54  
55  
56  
57

## Introduction

Diabetes and chronic kidney disease (CKD) are growing health problems worldwide, contributing to increased mortality [1]. Diabetes and CKD also impose a substantial economic burden on society, with particularly high costs relating to cardiovascular complications and renal replacement therapy [2,3]. The prevalence of CKD in patients with diabetes is between 4.2% and 17.9% (CKD stages 3 to 5) in European countries [4]. The leading cause of death in people with type 2 diabetes or CKD is cardiovascular disease rather than renal complications [5,6]. Prevention of cardiovascular events is a key focus in the management of patients with these conditions.

Multifactorial interventions to reduce cardiovascular risks were shown to be effective at reducing mortality and cardiovascular events in patients with type 2 diabetes and persistent microalbuminuria in the Steno-2 randomised trial [7,8]. This study provided a high level of evidence, but included a relatively small number of participants with diabetes who were managed in specialist centres. Recently, the implementation and effectiveness of this approach have been evaluated in patients with diabetes in clinical practice settings [9-11]. Epidemiological studies have demonstrated additional risks of CKD on mortality and cardiovascular diseases in people with diabetes [12], but

1  
2  
3  
4  
5  
6 treatment approaches in this population have not been well studied. No studies focused  
7  
8  
9 on multiple risk factor control (MRFC) in patients with both diabetes and CKD in a  
10  
11 wide clinical practice setting. Generally, patients with kidney disease have been  
12  
13 underrepresented in cardiovascular clinical trials [13]. This population may have an  
14  
15 altered risk-benefit profile, and extrapolation of data based on patients with normal  
16  
17 kidney function into patients with CKD may be unreliable [13]. We aimed to conduct a  
18  
19 pragmatic evaluation of the effectiveness of MRFC on mortality and cardiovascular  
20  
21 events in participants with type 2 diabetes and CKD in a population-based cohort study.  
22  
23  
24  
25  
26  
27  
28  
29  
30

## 31 **Methods**

### 32 *Data sources*

33  
34 This study employed a linked dataset derived from the UK Clinical Practice Research  
35  
36 Datalink (CPRD), the UK National Health Service Hospital Episodes Statistics (HES)  
37  
38 inpatient data, and the UK Office for National Statistics (ONS) mortality data. The  
39  
40 CPRD contains anonymised electronic health records from general practices across the  
41  
42 UK [14]. The CPRD collects data for diagnoses and clinical assessment, prescriptions  
43  
44 and laboratory test results, such as HbA1c and serum creatinine. The HES inpatient data  
45  
46 were comprised of inpatient records from all National Health Service hospitals in  
47  
48  
49  
50  
51  
52  
53  
54  
55  
56  
57  
58  
59  
60

1  
2  
3  
4  
5  
6 England. Information on the date of death and the causes of death were available in the  
7  
8 ONS mortality data file. Multiple causes of death can be recorded in the mortality data.  
9  
10  
11 Diagnoses and clinical evaluation in the CPRD were coded with the Read codes, a  
12  
13  
14 hierarchical coding system used in primary care in the UK, whereas those in the HES  
15  
16  
17 and ONS were coded with the International Classification of Diseases, tenth revision  
18  
19  
20 (ICD-10). Linked data are available for general practices in England only and  
21  
22  
23 participants were limited to those with linked data for the HES and ONS available. The  
24  
25  
26 study was approved by the CPRD Independent Scientific Advisory Committee (ISAC  
27  
28 Protocol 15\_201R).

### 31 32 33 34 *Study population*

35  
36  
37 The scheme of the study cohort selection is presented in figure S1. We initially sampled  
38  
39  
40 participants who were diagnosed with type 2 diabetes from the CPRD [15]. Using the  
41  
42  
43 CPRD records, the date of the first valid serum creatinine value between 2006 and 2010  
44  
45  
46 recorded more than one year after the first diagnosis of diabetes were defined as the  
47  
48  
49 index date. A similar approach was taken by Adamsson Eryd et al [16] to ensure that  
50  
51  
52 participants managed for diabetes had sufficient time available for recording of baseline  
53  
54  
55 values. To avoid misclassification of CKD status and stage, the index serum creatinine  
56  
57  
58  
59  
60

1  
2  
3  
4  
5  
6 values were validated by confirmation of subsequent values within 30% of the index  
7  
8 values. We restricted the sample to participants aged 40 to 79 years at the index date  
9  
10 with at least one year of follow-up data available (ie, participants who died in the first  
11  
12 year of follow-up were excluded). Estimated glomerular filtration rate (eGFR) was  
13  
14 calculated from a serum creatinine value, age, gender, and ethnicity, using the Chronic  
15  
16 Kidney Disease Epidemiology Collaboration (CKD-EPI) equation [17]. Missing  
17  
18 ethnicity was assumed as 'non-black' in the present study. Participants diagnosed with  
19  
20 end-stage renal disease, those who had received renal replacement therapy, or those with  
21  
22 index eGFR  $<15$  mL/min/1.73 m<sup>2</sup> were excluded. We also excluded participants with  
23  
24 missing data for smoking status, body mass index (BMI), HbA1c, blood pressure, or  
25  
26 total cholesterol, or those with extreme BMI ( $<18.5$  or  $\geq 45$  kg/m<sup>2</sup>) at baseline. Since it  
27  
28 has been reported that low values of cardiovascular risk factors were not always  
29  
30 associated with better outcomes in observational studies [15,18,19], possibly due to  
31  
32 reverse causation [20,21], participants with low HbA1c ( $<42$  mmol/mol or  $<6.0\%$ ),  
33  
34 blood pressure (systolic  $<120$  or diastolic  $<60$  mmHg), and total cholesterol ( $<3$   
35  
36 mmol/L) were further excluded. Participants were categorised according to index eGFR  
37  
38 into participants with CKD ( $<60$  mL/min/1.73 m<sup>2</sup>) and those with non-CKD ( $\geq 60$   
39  
40 mL/min/1.73 m<sup>2</sup>).  
41  
42  
43  
44  
45  
46  
47  
48  
49  
50  
51  
52  
53  
54  
55  
56  
57  
58  
59  
60

### *Multiple risk factor control*

MRFC was defined in this study as consisting of four components: (1) HbA1c <53 mmol/mol (<7.0%), (2) blood pressure <140/90 mmHg (systolic <140 and diastolic <90 mmHg), (3) total cholesterol <5 mmol/L, and (4) no smoking (non- or ex-smokers). The means of HbA1c, blood pressure, and total cholesterol records within one year before the index date were evaluated. The number of the risk factors controlled from four criteria was treated as the exposure and included as a categorical variable in the analyses, with those meeting no or one criterion as a reference category.

### *Outcomes*

Main outcomes of interest in this study included all-cause and cardiovascular mortality, fatal and non-fatal coronary heart disease (CHD) and stroke. The date of death and causes of death were determined using the ONS mortality data. Participants who died from cardiovascular causes were identified if people had any of the ICD-10 codes I00 to I99 as a cause of death. Similarly, participants who died from renal causes were identified by the ICD-10 codes N17 to N19. All of the CPRD, HES and ONS were used to ascertain fatal and non-fatal CHD and stroke. Read codes for CHD and stroke



1  
2  
3  
4  
5  
6 reported previously [22,23] were updated for the present study. The ICD-10 codes for  
7  
8 CHD and stroke were I20 to I25 and I60, I61, I63 and I64, respectively.  
9

### 10 11 12 13 14 *Analysis*

15  
16  
17 Baseline characteristics of the study cohort were described according to CKD status.

18  
19  
20 Time-to-event analyses were conducted to evaluate the associations of MRFC with  
21  
22 mortality and cardiovascular events. To address the issue of reverse causation and to  
23  
24 avoid misclassification of the outcomes from those which had existed at baseline,  
25  
26 person-years for participants who experienced outcomes of interest in the first year of  
27  
28 follow-up were excluded from analyses (figure S1). Cox proportional hazards models  
29  
30  
31 were used to evaluate the association of MRFC with all-cause mortality. Proportional  
32  
33 hazards assumption was assessed by visual inspection of log-log plots, and no apparent  
34  
35 violation was found. Competing risks regression with subdistribution hazard models  
36  
37 were conducted for cardiovascular mortality and cardiovascular events, considering  
38  
39 competing risks for non-cardiovascular and all-cause death, respectively [24].  
40  
41  
42

43  
44  
45 Associations of MRFC with cardiovascular events were evaluated in participants  
46  
47  
48 without a known history of cardiovascular diseases at baseline (figure S1). Participants  
49  
50  
51 were followed from the index date until the earliest of the events of interest, the last date  
52  
53  
54  
55  
56

1  
2  
3  
4  
5  
6 of CPRD records, or 31 March 2015 for all-cause mortality evaluation. In the competing  
7  
8 risks regression analyses for cardiovascular mortality and cardiovascular events,  
9  
10 participants who experienced the corresponding competing events prior to the event of  
11  
12 interest were also censored.  
13  
14  
15

16  
17  
18  
19 Main analyses were conducted by CKD status, adjusting for a range of baseline  
20  
21 covariates, including age (continuous), gender (male or female), CKD stage (3a, 3b, and  
22  
23 4; for CKD cohort), BMI (18.5–24.9, 25.0–29.9, 30.0–34.9, 35.0–39.9, and 40.0–44.9  
24  
25 kg/m<sup>2</sup>), deprivation level (quintile; 1, least deprived, to 5, most deprived), duration of  
26  
27 diabetes (1.0–4.9, 5.0–9.9, and 10+ years), proteinuria status, including  
28  
29 microalbuminuria (yes, no, and a missing category), a history of cardiovascular diseases,  
30  
31 including CHD and stroke (for mortality evaluation), and prescribing during six months  
32  
33 prior to the index date of antidiabetic drugs (none, insulin with and without other  
34  
35 antidiabetic drugs, and non-insulin drugs only), antihypertensive drugs (none, drugs  
36  
37 acting on renin-angiotensin system with and without other antihypertensive drugs, and  
38  
39 other classes of antihypertensive drugs only, including  $\beta$ -blockers, calcium channel  
40  
41 blockers, and thiazide diuretics), statins and antiplatelet drugs, and index year (2006 to  
42  
43 2010). In addition, the associations of CKD with the outcomes were evaluated  
44  
45  
46  
47  
48  
49  
50  
51  
52  
53  
54  
55  
56  
57  
58  
59  
60

1  
2  
3  
4  
5  
6 according to the number of risk factors controlled, adjusting for the potential  
7  
8 confounding factors described above.  
9

10  
11  
12  
13  
14 In this paper, the results for participants with CKD were focused on, with the results for  
15  
16 those with non-CKD shown for comparative purposes. The associations of each  
17  
18 component of MRFC with the outcomes were also evaluated to aid interpretation of the  
19  
20 study results. All analyses were performed using Stata version 14 (Stata Corp., College  
21  
22 Station TX). The ‘forestplot’ package in R was used to present the results [25].  
23  
24  
25  
26  
27  
28  
29  
30

### 31 *Patient and Public Involvement*

32  
33  
34 No patients were involved in setting the research question or the outcome measures, nor  
35  
36 were they involved in developing plans for design or implementation of the study. No  
37  
38 patients were asked to advise on interpretation or writing up of results. Results will be  
39  
40 disseminated to relevant patient communities through news media.  
41  
42  
43  
44  
45  
46  
47

## 48 **Results**

### 49 *Characteristics of the study population*

50  
51  
52  
53  
54 Baseline characteristics of the study cohort are shown according to CKD status in table  
55  
56  
57  
58  
59  
60

1  
2  
3  
4  
5  
6 1. Mean index eGFR was 49 mL/min/1.73 m<sup>2</sup> for participants with CKD and 81  
7  
8 mL/min/1.73 m<sup>2</sup> for those with non-CKD. Participants with CKD were older (71 vs 62  
9  
10 years), included more women (52% vs 40%), had a longer duration of diabetes, and  
11  
12 were more likely to have a history of cardiovascular diseases (37% vs 22%). A higher  
13  
14 frequency of proteinuria was recorded in participants with CKD (18% vs 12% among  
15  
16 participants with records of proteinuria status). HbA1c and total cholesterol were  
17  
18 slightly lower in participants with CKD. Although diastolic blood pressure was lower in  
19  
20 participants with CKD, systolic blood pressure was higher despite more people under  
21  
22 antihypertensive medications. Participants with CKD were prescribed insulin, drugs on  
23  
24 renin-angiotensin system, statins, and antiplatelet drugs more frequently.  
25  
26  
27  
28  
29  
30  
31  
32  
33  
34  
35  
36

### 37 *Implementation of MRFC*

38  
39 The number of risk factors controlled from four components of MRFC are shown in  
40  
41 table 2. More detailed results of which of the components were controlled are available  
42  
43 in table S1. Higher rates of control for HbA1c, total cholesterol, and smoking status  
44  
45 were observed in participants with CKD compared with those with non-CKD. However,  
46  
47 blood pressure was less likely managed in participants with CKD (46% vs 51%). There  
48  
49 were some differences in management status according to a history of cardiovascular  
50  
51  
52  
53  
54  
55  
56  
57  
58  
59  
60

1  
2  
3  
4  
5  
6 diseases; in participants with CKD, higher rates of control of blood pressure (49% vs  
7  
8 44%) and total cholesterol (83% vs 76%) in participants with a history of cardiovascular  
9  
10 diseases compared with those without. Participants meeting three or four criteria  
11  
12 accounted for 37% or 13% in participants with CKD.  
13  
14  
15

### 16 17 18 19 20 *Effectiveness of MRFC*

21  
22 Absolute risks for mortality and cardiovascular diseases and adjusted relative hazards of  
23  
24 the number of risk factors controlled for the outcomes are shown in figure 1. Increasing  
25  
26 numbers of risk factors controlled were associated with lower relative hazards for all  
27  
28 outcomes studied relative to participants meeting no or one criterion. For participants  
29  
30 with CKD meeting four MRFC criteria, the adjusted hazard ratio (HR) for all-cause  
31  
32 mortality was 0.60 (95% CI 0.53 to 0.69), and adjusted subdistribution HR for  
33  
34 cardiovascular mortality was 0.60 (0.50 to 0.70). Participants meeting four criteria also  
35  
36 had lower relative risks for CHD (adjusted subdistribution HR 0.73, 95% CI 0.59 to  
37  
38 0.91) and stroke (0.63, 0.45 to 0.89) in participants with CKD. In participants with  
39  
40 non-CKD, increasing numbers of risk factors controlled were also associated with lower  
41  
42 risks for all-cause and cardiovascular mortality, CHD, and stroke. As shown in figure S2,  
43  
44 the strengths of associations of each component of MRFC with mortality and  
45  
46  
47  
48  
49  
50  
51  
52  
53  
54  
55  
56  
57  
58  
59  
60

1  
2  
3  
4  
5  
6 cardiovascular diseases were different; for example, the greatest associations of no  
7  
8 smoking with all-cause and cardiovascular mortality were observed in participants with  
9  
10  
11 and without CKD.  
12

### 13 14 15 16 17 *Comparisons between CKD and non-CKD* 18

19  
20 Unadjusted absolute risks for mortality and cardiovascular diseases were higher in  
21  
22 participants with CKD by 1.4- to 2.9-fold compared with those with non-CKD at the  
23  
24 same MRFC category (figure 1). More participants with CKD died from cardiovascular  
25  
26 causes compared with those without (63% vs 54%,  $P<0.001$ ). More participants with  
27  
28 CKD died from renal causes ( $n=631$  or 5% vs  $n=326$  or 0.9%,  $P<0.001$ ), but the  
29  
30 proportions were much smaller than cardiovascular causes of death. Relative hazards of  
31  
32 CKD for the outcomes are shown in figure 2. After adjustment with possible  
33  
34 confounding factors, comorbid CKD remained to be associated with greater risks for  
35  
36 all-cause mortality (adjusted HR, 1.16 to 1.30) and cardiovascular mortality (adjusted  
37  
38 subdistribution HR, 1.25 to 1.41). In participants meeting two or more criteria,  
39  
40 comorbid CKD was associated with a higher risk for CHD (1.18 to 1.25). The  
41  
42 associations of comorbid CKD with stroke was observed in participants meeting four  
43  
44 criteria only (1.64).  
45  
46  
47  
48  
49  
50  
51  
52  
53  
54  
55  
56  
57  
58  
59  
60

## Discussion

In this population-based cohort study of participants with type 2 diabetes and CKD stages 3 or 4, MRFC was associated with lower relative risks for mortality (N>11,000) and cardiovascular diseases (N>7,000). We also confirmed that CKD was associated with increased risks for mortality and cardiovascular events. Higher absolute risks for mortality and cardiovascular events and great relative risk reduction associated with MRFC suggest that the MRFC strategy may be one of the main approaches to potentially reducing the burden of diabetes and CKD.

This study evaluated the effectiveness of MRFC in patients with type 2 diabetes according to presence or absence of CKD in clinical practice. So far, the associations of MRFC with lower risks for mortality and cardiovascular events have been shown in people with diabetes, not focusing on CKD status. Participants with controlled three risk factors of HbA1c, blood pressure, and LDL cholesterol had 62% and 60% risk reduction for cardiovascular events and CHD, respectively, in patients with diabetes without known cardiovascular diseases [10]. The associations of uncontrolled HbA1c, blood pressure, LDL cholesterol, and smoking with mortality and cardiovascular events were

1  
2  
3  
4  
5  
6 individually evaluated in a large population-based study with >850,000 participants  
7  
8 with diabetes [11]. The study cohort included 35.5% of participants with CKD in those  
9  
10 with cardiovascular diseases and 21.8% in those without, and CKD was included in the  
11  
12 analyses for adjustment. This study suggested that uncontrolled risk factors attributed to  
13  
14 about 1 in 3 major cardiovascular events and fewer 1 in 10 deaths.  
15  
16  
17  
18  
19  
20  
21  
22

23 The strength of this study was the inclusion of a large size of >11,000 participants with  
24  
25 diabetes and CKD with an observation of >62,000 person-years. In addition to the large  
26  
27 sample size and long-term follow-up, representativeness from general population and  
28  
29 data quality are also advantages of the CPRD [14], which should remain even if linked  
30  
31 data for HES and ONS are only available for England practices. Instead, linked data for  
32  
33 diagnoses in hospitals and death registration substantially enhanced the validity of the  
34  
35 study to evaluate mortality and cardiovascular events.  
36  
37  
38  
39  
40  
41  
42  
43  
44

45 There are also some limitations in this study. First, despite our focus on the number of  
46  
47 MRFC, the impacts of each component of MRFC on mortality and cardiovascular  
48  
49 events were different. Different cut-off points for HbA1c, blood pressure, and total  
50  
51 cholesterol may bring different results. Next, we could not conclude that associations  
52  
53  
54  
55  
56  
57  
58  
59  
60



1  
2  
3  
4  
5  
6 represented causal relationships between MRFC and mortality and cardiovascular  
7  
8 events in this non-randomised study. There is a possibility of confounding if healthier  
9  
10 participants were managed more successfully and this resulted in being categorised as  
11  
12 those with greater number of risk factors controlled. For example, stringent  
13  
14 management of HbA1c might not be targeted for vulnerable participants due to concerns  
15  
16 for greater risk of hypoglycaemia, a form of confounding by contra-indication. We  
17  
18 cannot exclude the possibility of residual confounding, despite adjustment with a range  
19  
20 of covariates in the analyses, including physical activity and alcohol intake [26,27].  
21  
22 Then, measurement and assay methods for HbA1c, blood pressure, cholesterol and  
23  
24 serum creatinine might not have been standardised among general practices or  
25  
26 laboratories. As well as missing data on ethnicity and fluctuations in serum creatinine  
27  
28 values, these methodological limitations might influence the determination of CKD  
29  
30 status or staging. Although proteinuria has been known as a risk factor for mortality and  
31  
32 cardiovascular diseases [28,29], we could not determine proteinuria status completely as  
33  
34 reported previously [30,31]. Incomplete records on proteinuria may introduce a bias for  
35  
36 proteinuria status and possibly influence the study results. Finally, although we used one  
37  
38 of the largest primary care electronic health records database, it seemed to be  
39  
40 insufficient to separately evaluate MRFC for participants with different stages of CKD.  
41  
42  
43  
44  
45  
46  
47  
48  
49  
50  
51  
52  
53  
54  
55  
56

1  
2  
3  
4  
5  
6 Further research is needed to focus on patients with more advanced CKD who may have  
7  
8 altered risk-benefit profile compared with patients with less impaired renal function.  
9

10  
11  
12  
13  
14 In summary, based on the population-based cohort study of routine clinical practices,  
15  
16 MRFC may lower the increased risks for mortality and cardiovascular events in people  
17  
18 with diabetes and CKD. Further research is needed to evaluate appropriateness of  
19  
20 MRFC according to individual participants' health status for improved management of  
21  
22 cardiovascular risks in this population.  
23  
24  
25  
26  
27  
28  
29  
30

### 31 **Acknowledgments**

32  
33  
34 SH was supported by the Uehara Memorial Foundation Postdoctoral Fellowship, Tokyo,  
35  
36 Japan. MCG was supported by the National Institute for Health Research (NIHR)  
37  
38 Biomedical Research Centre at Guy's and St Thomas' NHS Foundation Trust and  
39  
40 King's College London. This study is based on data from the CPRD obtained under  
41  
42 license from the UK Medicines and Healthcare products Regulatory Agency. However,  
43  
44 the interpretation and conclusions contained in this report are those of the authors alone  
45  
46 and not necessarily those of the National Health Service, the NIHR or the Department  
47  
48 of Health.  
49  
50  
51  
52  
53  
54  
55  
56  
57  
58  
59  
60

1  
2  
3  
4  
5  
6  
7  
8  
9 **Contributors:** Both authors contributed to conception and study design of the study,  
10  
11 data acquisition, statistical analysis, and interpretation. SH drafted the manuscript and  
12  
13  
14 MCG revised it critically for important intellectual content.  
15

16  
17 **Funding:** This research received no specific grant from any funding agency.  
18

19  
20 **Competing interests:** None declared.  
21

22  
23 **Provenance and peer review:** Not commissioned; externally peer reviewed.  
24

25  
26 **Data sharing statement:** No additional data are available.  
27  
28  
29  
30

## 31 **References**

- 32  
33  
34 1. GBD 2013 Mortality and Causes of Death Collaborators. Global, regional, and  
35  
36 national age-sex specific all-cause and cause-specific mortality for 240 causes of  
37  
38 death, 1990-2013: a systematic analysis for the Global Burden of Disease Study  
39  
40 2013. *Lancet*. 2015;385(9963):117-171.  
41  
42  
43  
44  
45 2. Seuring T, Archangelidi O, Suhrcke M. The Economic Costs of Type 2 Diabetes:  
46  
47 A Global Systematic Review. *Pharmacoeconomics*. 2015;33(8):811-831.  
48  
49  
50  
51 3. Kerr M, Bray B, Medcalf J, O'Donoghue DJ, Matthews B. Estimating the  
52  
53 financial cost of chronic kidney disease to the NHS in England. *Nephrol Dial*  
54  
55  
56  
57  
58  
59  
60

- 1  
2  
3  
4  
5  
6 *Transplant.* 2012;27 Suppl 3:iii73-80.  
7  
8  
9 4. Brück K, Stel VS, Gambaro G, Hallan S, Völzke H, Ärnlöv J, et al. CKD  
10  
11 Prevalence Varies across the European General Population. *J Am Soc Nephrol.*  
12  
13  
14 2016;27(7):2135-2147.  
15  
16  
17 5. Holman RR, Paul SK, Bethel MA, Matthews DR, Neil HA. 10-year follow-up of  
18  
19 intensive glucose control in type 2 diabetes. *N Engl J Med.*  
20  
21  
22 2008;359(15):1577-1589.  
23  
24  
25 6. Go AS, Chertow GM, Fan D, McCulloch CE, Hsu CY. Chronic kidney disease  
26  
27 and the risks of death, cardiovascular events, and hospitalization. *N Engl J Med.*  
28  
29  
30 2004;351(13):1296-1305.  
31  
32  
33  
34 7. Gaede P, Vedel P, Larsen N, Jensen GV, Parving HH, Pedersen O. Multifactorial  
35  
36 intervention and cardiovascular disease in patients with type 2 diabetes. *N Engl J*  
37  
38  
39 *Med.* 2003;348(5):383-393.  
40  
41  
42 8. Gaede P, Lund-Andersen H, Parving HH, Pedersen O. Effect of a multifactorial  
43  
44 intervention on mortality in type 2 diabetes. *N Engl J Med.* 2008;358(6):580-591.  
45  
46  
47  
48 9. Wong ND, Patao C, Wong K, Malik S, Franklin SS, Iloeje U. Trends in control of  
49  
50 cardiovascular risk factors among US adults with type 2 diabetes from 1999 to  
51  
52  
53 2010: comparison by prevalent cardiovascular disease status. *Diab Vasc Dis Res.*  
54  
55  
56

- 1  
2  
3  
4  
5  
6 2013;10(6):505-513.  
7  
8  
9 10. Wong ND, Zhao Y, Patel R, Patao C, Malik S, Bertoni AG, et al. Cardiovascular  
10  
11 Risk Factor Targets and Cardiovascular Disease Event Risk in Diabetes: A  
12  
13 Pooling Project of the Atherosclerosis Risk in Communities Study, Multi-Ethnic  
14  
15 Study of Atherosclerosis, and Jackson Heart Study. *Diabetes Care*.  
16  
17 2016;39(5):668-676.  
18  
19  
20  
21  
22 11. Vazquez-Benitez G, Desai JR, Xu S, Goodrich GK, Schroeder EB, Nichols GA, et  
23  
24 al. Preventable major cardiovascular events associated with uncontrolled glucose,  
25  
26 blood pressure, and lipids and active smoking in adults with diabetes with and  
27  
28 without cardiovascular disease: a contemporary analysis. *Diabetes Care*.  
29  
30 2015;38(5):905-912.  
31  
32  
33  
34  
35  
36  
37 12. Cea Soriano L, Johansson S, Stefansson B, Rodríguez LA. Cardiovascular events  
38  
39 and all-cause mortality in a cohort of 57,946 patients with type 2 diabetes:  
40  
41 associations with renal function and cardiovascular risk factors. *Cardiovasc*  
42  
43 *Diabetol*. 2015;14:38.  
44  
45  
46  
47  
48 13. Konstantinidis I, Nadkarni GN, Yacoub R, Saha A, Simoes P, Parikh CR, et al.  
49  
50 Representation of Patients With Kidney Disease in Trials of Cardiovascular  
51  
52 Interventions: An Updated Systematic Review. *JAMA Intern Med*.  
53  
54  
55  
56  
57  
58  
59  
60

- 1  
2  
3  
4  
5  
6 2016;176(1):121-124.  
7  
8  
9 14. Herrett E, Gallagher AM, Bhaskaran K, Forbes H, Mathur R, van Staa T, et al.  
10  
11 Data Resource Profile: Clinical Practice Research Datalink (CPRD). *Int J*  
12  
13 *Epidemiol.* 2015;44(3):827-836.  
14  
15  
16  
17 15. Nicholas J, Charlton J, Dregan A, Gulliford MC. Recent HbA1c values and  
18  
19 mortality risk in type 2 diabetes. population-based case-control study. *PLoS One.*  
20  
21  
22 2013;8(7):e68008.  
23  
24  
25  
26 16. Adamsson Eryd S, Gudbjörnsdottir S, Manhem K, Rosengren A, Svensson AM,  
27  
28 Miftaraj M, et al. Blood pressure and complications in individuals with type 2  
29  
30 diabetes and no previous cardiovascular disease: national population based cohort  
31  
32 study. *BMJ.* 2016;354:i4070.  
33  
34  
35  
36  
37 17. Levey AS, Stevens LA, Schmid CH, Zhang YL, Castro AF 3rd, Feldman HI, et al.  
38  
39 A new equation to estimate glomerular filtration rate. *Ann Intern Med.*  
40  
41 2009;150(9):604-612.  
42  
43  
44  
45 18. Kontopantelis E, Springate DA, Reeves D, Ashcroft DM, Rutter MK, Buchan I, et  
46  
47 al. Glucose, blood pressure and cholesterol levels and their relationships to  
48  
49 clinical outcomes in type 2 diabetes: a retrospective cohort study. *Diabetologia.*  
50  
51 2015;58(3):505-518.  
52  
53  
54  
55  
56  
57  
58  
59  
60

- 1  
2  
3  
4  
5  
6 19. Afghahi H, Svensson MK, Pirouzifard M, Eliasson B, Svensson AM. Blood  
7  
8 pressure level and risk of major cardiovascular events and all-cause of mortality in  
9  
10 patients with type 2 diabetes and renal impairment: an observational study from  
11  
12 the Swedish National Diabetes Register. *Diabetologia*. 2015;58(6):1203-1211.  
13  
14  
15  
16  
17 20. Herrington W, Staplin N, Judge PK, Mafham M, Emberson J, Haynes R, et al.  
18  
19 Evidence for Reverse Causality in the Association Between Blood Pressure and  
20  
21 Cardiovascular Risk in Patients With Chronic Kidney Disease. *Hypertension*.  
22  
23 2017;69(2):314-322.  
24  
25  
26  
27  
28 21. Weiner DE, Sarnak MJ. Managing dyslipidemia in chronic kidney disease. *J Gen*  
29  
30 *Intern Med*. 2004;19(10):1045-1052.  
31  
32  
33  
34 22. Gulliford MC, Charlton J, Ashworth M, Rudd AG, Toshke AM; eCRT Research  
35  
36 Team. Selection of medical diagnostic codes for analysis of electronic patient  
37  
38 records. Application to stroke in a primary care database. *PLoS One*.  
39  
40 2009;4(9):e7168.  
41  
42  
43  
44  
45 23. Bhattarai N, Charlton J, Rudisill C, Gulliford MC. Coding, recording and  
46  
47 incidence of different forms of coronary heart disease in primary care. *PLoS One*.  
48  
49 2012;7(1):e29776.  
50  
51  
52  
53  
54 24. Austin PC, Lee DS, Fine JP. Introduction to the Analysis of Survival Data in the  
55  
56  
57  
58  
59  
60

- 1  
2  
3  
4  
5  
6 Presence of Competing Risks. *Circulation*. 2016;133(6):601-609.  
7  
8  
9 25. Gordon M, Lumley T. Advanced Forest Plot Using 'grid' Graphics. Vienna: The  
10  
11 Comprehensive R Archive Network, 2016.  
12  
13  
14 26. Anand SS, Islam S, Rosengren A, Franzosi MG, Steyn K, Yusufali AH, et al. Risk  
15  
16 factors for myocardial infarction in women and men: insights from the  
17  
18 INTERHEART study. *Eur Heart J*. 2008;29(7):932-940.  
19  
20  
21  
22 27. O'Donnell MJ, Xavier D, Liu L, Zhang H, Chin SL, Rao-Melacini P, et al. Risk  
23  
24 factors for ischaemic and intracerebral haemorrhagic stroke in 22 countries (the  
25  
26 INTERSTROKE study): a case-control study. *Lancet*. 2010;376(9735):112-123.  
27  
28  
29  
30  
31 28. Chronic Kidney Disease Prognosis Consortium., Matsushita K, van der Velde M,  
32  
33 Astor BC, Woodward M, Levey AS, de Jong PE, et al. Association of estimated  
34  
35 glomerular filtration rate and albuminuria with all-cause and cardiovascular  
36  
37 mortality in general population cohorts: a collaborative meta-analysis. *Lancet*.  
38  
39 2010;375(9731):2073-2081.  
40  
41  
42  
43  
44  
45 29. Matsushita K, Coresh J, Sang Y, Chalmers J, Fox C, Guallar E, et al. Estimated  
46  
47 glomerular filtration rate and albuminuria for prediction of cardiovascular  
48  
49 outcomes: a collaborative meta-analysis of individual participant data. *Lancet*  
50  
51  
52  
53  
54 *Diabetes Endocrinol*. 2015;3(7):514-525.  
55  
56  
57  
58  
59  
60



- 1  
2  
3  
4  
5  
6 30. Dreyer G, Hull S, Aitken Z, Chesser A, Yaqoob MM. The effect of ethnicity on  
7  
8 the prevalence of diabetes and associated chronic kidney disease. *QJM*.  
9  
10 2009;102(4):261-269.  
11  
12  
13  
14 31. Liang H, Kennedy C, Manne S, Lin JH, Dolin P. Monitoring for proteinuria in  
15  
16 patients with type 2 diabetes mellitus. *BMJ Open Diabetes Res Care*.  
17  
18 2015;3(1):e000071.  
19  
20  
21  
22  
23  
24  
25  
26  
27  
28  
29  
30  
31  
32  
33  
34  
35  
36  
37  
38  
39  
40  
41  
42  
43  
44  
45  
46  
47  
48  
49  
50  
51  
52  
53  
54  
55  
56  
57  
58  
59  
60

**Table 1.** Baseline characteristics of the study cohort by CKD status

|                                                 |                    | CKD<br>(N=11,431) | Non-CKD<br>(N=36,429) | P value |
|-------------------------------------------------|--------------------|-------------------|-----------------------|---------|
| Age (years)                                     | Mean (SD)          | 71 (6)            | 62 (9)                | <0.001  |
| Gender                                          | Male               | 5,481 (48)        | 22,006 (60)           | <0.001  |
|                                                 | Female             | 5,950 (52)        | 14,423 (40)           |         |
| eGFR (mL/min/1.73 m <sup>2</sup> )              | Mean (SD)          | 49 (9)            | 81 (13)               | –       |
|                                                 | 15–29              | 558 (5)           | –                     |         |
|                                                 | 30–44              | 2,655 (23)        | –                     |         |
|                                                 | 45–59              | 8,218 (72)        | –                     |         |
| Smoking status                                  | Non-smoker         | 5,426 (47)        | 16,511 (45)           | <0.001  |
|                                                 | Ex-smoker          | 4,327 (38)        | 12,217 (34)           |         |
|                                                 | Current smoker     | 1,678 (15)        | 7,701 (21)            |         |
| BMI (kg/m <sup>2</sup> )                        | 18.5–24.9          | 1,459 (13)        | 4,097 (11)            | <0.001  |
|                                                 | 25.0–29.9          | 4,329 (38)        | 13,054 (36)           |         |
|                                                 | 30.0–34.9          | 3,527 (31)        | 11,485 (32)           |         |
|                                                 | 35.0–39.9          | 1,541 (13)        | 5,454 (15)            |         |
|                                                 | 40.0–44.9          | 575 (5)           | 2,339 (6)             |         |
| Deprivation level (quintile)                    | 1 (least deprived) | 1,508 (13)        | 4,785 (13)            | 0.293   |
|                                                 | 2                  | 2,331 (20)        | 7,300 (20)            |         |
|                                                 | 3                  | 2,374 (21)        | 7,640 (21)            |         |
|                                                 | 4                  | 2,637 (23)        | 8,172 (22)            |         |
|                                                 | 5 (most deprived)  | 2,581 (23)        | 8,532 (23)            |         |
| Duration of diabetes (years)                    | 1.0–4.9            | 5,208 (46)        | 22,527 (62)           | <0.001  |
|                                                 | 5.0–9.9            | 2,954 (26)        | 8,356 (23)            |         |
|                                                 | ≥10.0              | 3,269 (29)        | 5,546 (15)            |         |
| Proteinuria                                     | Yes                | 1,714 (15)        | 3,279 (9)             | <0.001  |
|                                                 | No                 | 7,666 (67)        | 24,110 (66)           |         |
|                                                 | Missing            | 2,051 (18)        | 9,040 (25)            |         |
| History of coronary heart disease and/or stroke |                    | 4,215 (37)        | 7,860 (22)            | <0.001  |
| HbA <sub>1c</sub> (mmol/mol or %)               | 42–47 (6.0–6.4)*   | 1,307 (11)        | 3,513 (10)            | <0.001  |
|                                                 | 48–52 (6.5–6.9)    | 3,041 (27)        | 8,900 (24)            |         |
|                                                 | 53–57 (7.0–7.4)    | 2,590 (23)        | 7,781 (21)            |         |
|                                                 | 58–63 (7.5–7.9)    | 1,709 (15)        | 5,461 (15)            |         |

|                                 |                                              |            |             |        |
|---------------------------------|----------------------------------------------|------------|-------------|--------|
|                                 | 64–68 (8.0–8.4)                              | 1,038 (9)  | 3,567 (10)  |        |
|                                 | ≥69 (≥8.5)                                   | 1,746 (15) | 7,207 (20)  |        |
| Systolic blood pressure (mmHg)  | 120–129                                      | 1,777 (16) | 7,203 (20)  | <0.001 |
|                                 | 130–139                                      | 3,508 (31) | 12,121 (33) |        |
|                                 | 140–149                                      | 3,387 (30) | 10,242 (28) |        |
|                                 | ≥150                                         | 2,759 (24) | 6,863 (19)  |        |
| Diastolic blood pressure (mmHg) | 60–79                                        | 7,238 (63) | 16,803 (46) | <0.001 |
|                                 | 80–89                                        | 3,599 (31) | 15,816 (43) |        |
|                                 | ≥90                                          | 594 (5)    | 3,810 (10)  |        |
| Total cholesterol (mmol/L)      | 3.0–3.9                                      | 3,782 (33) | 10,960 (30) | <0.001 |
|                                 | 4.0–4.9                                      | 5,220 (46) | 16,387 (45) |        |
|                                 | ≥5.0                                         | 2,429 (21) | 9,082 (25)  |        |
| Medication                      | Antidiabetic drugs                           |            |             | <0.001 |
|                                 | Insulin (± non-insulin)                      | 1,805 (16) | 3,225 (9)   |        |
|                                 | Non-insulin only                             | 7,722 (68) | 26,753 (73) |        |
|                                 | Antihypertensive drugs                       |            |             | <0.001 |
|                                 | Drugs on renin-angiotensin system (± others) | 8,472 (74) | 21,535 (59) |        |
|                                 | Other antihypertensive drugs only            | 1,610 (14) | 4,751 (13)  |        |
|                                 | Statins                                      | 9,004 (79) | 27,011 (74) | <0.001 |
|                                 | Antiplatelet drugs                           | 6,440 (56) | 16,375 (45) | <0.001 |
| Index year                      | 2006                                         | 9,091 (80) | 24,192 (66) | <0.001 |
|                                 | 2007                                         | 1,008 (9)  | 3,741 (10)  |        |
|                                 | 2008                                         | 545 (5)    | 2,880 (8)   |        |
|                                 | 2009                                         | 432 (4)    | 2,677 (7)   |        |
|                                 | 2010                                         | 355 (3)    | 2,939 (8)   |        |

BMI, body mass index; CKD, chronic kidney disease; eGFR, estimated glomerular filtration rate

Frequencies (percentages) are shown otherwise specified.

\* Participants with HbA1c <48 mmol/mol (<6.5%) were only included if they were prescribed antidiabetic drugs.

**Table 2.** Risk factors controlled according to chronic kidney disease and a history of cardiovascular diseases

|                                          | CKD                 |                     |                  | Non-CKD             |                      |                  |
|------------------------------------------|---------------------|---------------------|------------------|---------------------|----------------------|------------------|
|                                          | Total<br>(N=11,431) | No CVD<br>(N=7,216) | CVD<br>(N=4,215) | Total<br>(N=36,429) | No CVD<br>(N=28,569) | CVD<br>(N=7,860) |
| <i>Individual risk factor controlled</i> |                     |                     |                  |                     |                      |                  |
| HbA1c <53 mmol/mol (<7.0%)               | 4,348 (38)          | 2,767 (38)          | 1,581 (38)       | 12,413 (34)         | 9,603 (34)           | 2,810 (36)       |
| Blood pressure <140 & <90 mmHg           | 5,224 (46)          | 3,147 (44)          | 2,077 (49)       | 18,655 (51)         | 14,438 (51)          | 4,217 (54)       |
| Total cholesterol <5 mmol/L              | 9,002 (79)          | 5,512 (76)          | 3,490 (83)       | 27,347 (75)         | 20,826 (73)          | 6,521 (83)       |
| No smoking                               | 9,753 (85)          | 6,193 (86)          | 3,560 (84)       | 28,728 (79)         | 22,565 (79)          | 6,163 (78)       |
| <i>Number of risk factors controlled</i> |                     |                     |                  |                     |                      |                  |
| 0                                        | 138 (1)             | 87 (1)              | 51 (1)           | 806 (2)             | 678 (2)              | 128 (2)          |
| 1                                        | 1,427 (12)          | 971 (13)            | 456 (11)         | 5,372 (15)          | 4,421 (15)           | 951 (12)         |
| 2                                        | 4,162 (36)          | 2,693 (37)          | 1,469 (35)       | 13,288 (36)         | 10,602 (37)          | 2,686 (34)       |
| 3                                        | 4,240 (37)          | 2,598 (36)          | 1,642 (39)       | 12,657 (35)         | 9,665 (34)           | 2,992 (38)       |
| 4                                        | 1,464 (13)          | 867 (12)            | 597 (14)         | 4,306 (12)          | 3,203 (11)           | 1,103 (14)       |

CKD, chronic kidney disease; CVD, (a history of) cardiovascular diseases

Frequencies (percentages) are shown.

## Figure legends

**Figure 1.** Relative hazards of the number of risk factors controlled for mortality and cardiovascular events in (a) participants with chronic kidney disease (CKD) and (b) participants with non-CKD. Hazard ratios (HRs) for all-cause mortality and subdistribution hazard ratios (SHRs) for cardiovascular mortality, coronary heart disease, and stroke were adjusted for age, gender, CKD stage (for CKD cohort), body mass index, deprivation level, duration of diabetes, proteinuria status, a history of cardiovascular diseases (for mortality evaluation), prescribing of antidiabetic, antihypertensive, statins and antiplatelet drugs, and index year.

**Figure 2.** Relative hazards of presence of chronic kidney disease (CKD) for mortality and cardiovascular events compared with non-CKD as reference. Hazard ratios (HRs) for all-cause mortality and subdistribution hazard ratios (SHRs) for cardiovascular mortality, coronary heart disease, and stroke were adjusted for age, gender, body mass index, deprivation level, duration of diabetes, proteinuria status, a history of cardiovascular diseases (for mortality evaluation), prescribing of antidiabetic, antihypertensive, statins and antiplatelet drugs, and index year.

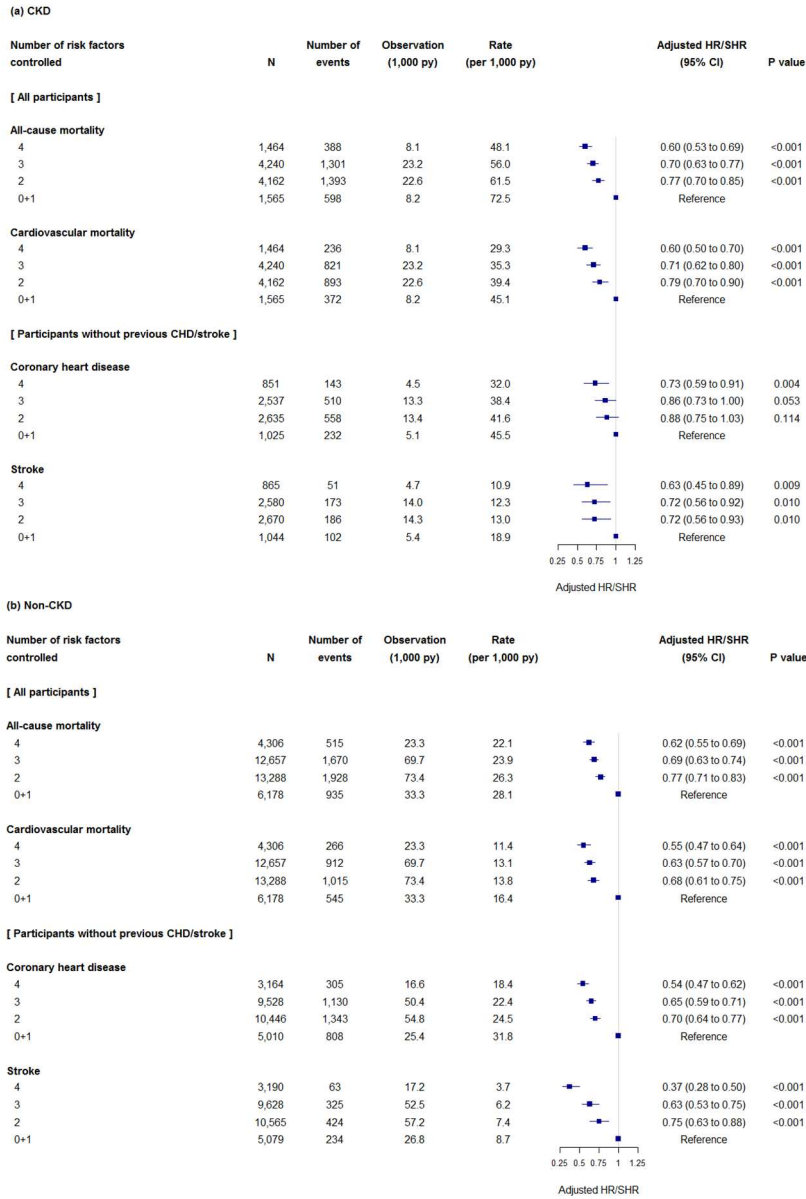

figure1

105x156mm (300 x 300 DPI)



figure2

66x78mm (300 x 300 DPI)

## SUPPLEMENTARY MATERIAL

Figure S1. Study cohort selection







BMI, body mass index; CKD, chronic kidney disease; CHD, coronary heart disease; CVD, Cardiovascular diseases; eGFR, estimated glomerular filtration rate; ESRD, end-stage renal disease; RRT, renal replacement therapy

**Table S1.** Breakdown of risk factors controlled according to chronic kidney disease and a history of cardiovascular diseases

| Number of risk factors controlled | HbA1c <53 mmol/mol (<7.0%) | Blood pressure <140/90 mmHg | Total cholesterol <5 mmol/L | No smoking | CKD (N=11,431) |            |          | Non-CKD (N=36,429) |            |            |
|-----------------------------------|----------------------------|-----------------------------|-----------------------------|------------|----------------|------------|----------|--------------------|------------|------------|
|                                   |                            |                             |                             |            | Overall        | No CVD     | CVD      | Overall            | No CVD     | CVD        |
| 0                                 | -                          | -                           | -                           | -          | 138 (1)        | 87 (1)     | 51 (1)   | 806 (2)            | 678 (2)    | 128 (2)    |
| 1                                 | Y                          | -                           | -                           | -          | 69 (0.6)       | 46 (0.6)   | 23 (0.6) | 312 (1)            | 260 (0.9)  | 52 (0.7)   |
|                                   | -                          | Y                           | -                           | -          | 89 (0.8)       | 64 (0.9)   | 25 (0.6) | 759 (2)            | 624 (2)    | 135 (2)    |
| 2                                 | -                          | -                           | Y                           | -          | 438 (4)        | 264 (4)    | 174 (4)  | 1,742 (5)          | 1,350 (5)  | 392 (5)    |
|                                   | -                          | -                           | -                           | Y          | 831 (7)        | 597 (8)    | 234 (6)  | 2,559 (7)          | 2,187 (8)  | 372 (5)    |
|                                   | Y                          | Y                           | -                           | -          | 62 (0.5)       | 43 (0.6)   | 19 (0.5) | 304 (0.8)          | 268 (0.9)  | 36 (0.5)   |
|                                   | Y                          | -                           | Y                           | -          | 245 (2)        | 152 (2)    | 93 (2)   | 794 (2)            | 590 (2)    | 204 (3)    |
|                                   | Y                          | -                           | -                           | Y          | 407 (4)        | 289 (4)    | 118 (3)  | 1,070 (3)          | 911 (3)    | 159 (2)    |
|                                   | -                          | Y                           | Y                           | -          | 390 (3)        | 215 (3)    | 175 (4)  | 1,911 (5)          | 1,446 (5)  | 465 (6)    |
| 3                                 | -                          | Y                           | -                           | Y          | 531 (5)        | 379 (5)    | 152 (4)  | 2,205 (6)          | 1,910 (7)  | 295 (4)    |
|                                   | -                          | -                           | Y                           | Y          | 2,527 (22)     | 1,615 (22) | 912 (22) | 7,004 (19)         | 5,477 (19) | 1,527 (19) |
|                                   | Y                          | Y                           | Y                           | -          | 247 (2)        | 152 (2)    | 95 (2)   | 1,073 (3)          | 788 (3)    | 285 (4)    |
|                                   | Y                          | Y                           | -                           | Y          | 302 (3)        | 199 (3)    | 103 (2)  | 1,067 (3)          | 905 (3)    | 162 (2)    |
|                                   | Y                          | -                           | Y                           | Y          | 1,552 (14)     | 1,019 (14) | 533 (13) | 3,487 (10)         | 2,678 (9)  | 809 (10)   |
| 4                                 | -                          | Y                           | Y                           | Y          | 2,139 (19)     | 1,228 (17) | 911 (22) | 7,030 (19)         | 5,294 (19) | 1,736 (22) |
|                                   | Y                          | Y                           | Y                           | Y          | 1,464 (13)     | 867 (12)   | 597 (14) | 4,306 (12)         | 3,203 (11) | 1,103 (14) |

Y, meeting the criterion; -, not meeting the criterion

CKD, chronic kidney disease; CVD, (a history of) cardiovascular diseases

**Figure S2.** Relative hazards of individual risk factors controlled for mortality and cardiovascular events in (a) participants with chronic kidney disease (CKD) and (b) participants with non-CKD. Hazard ratios (HRs) for all-cause mortality and subdistribution hazard ratios (SHRs) for cardiovascular mortality, coronary heart disease, and stroke were adjusted for age, gender, CKD stage (for CKD cohort), body mass index, deprivation level, duration of diabetes, proteinuria status, a history of cardiovascular diseases (for mortality evaluation), prescribing of antidiabetic, antihypertensive, statins and antiplatelet drugs, and index year.

**(a) CKD**

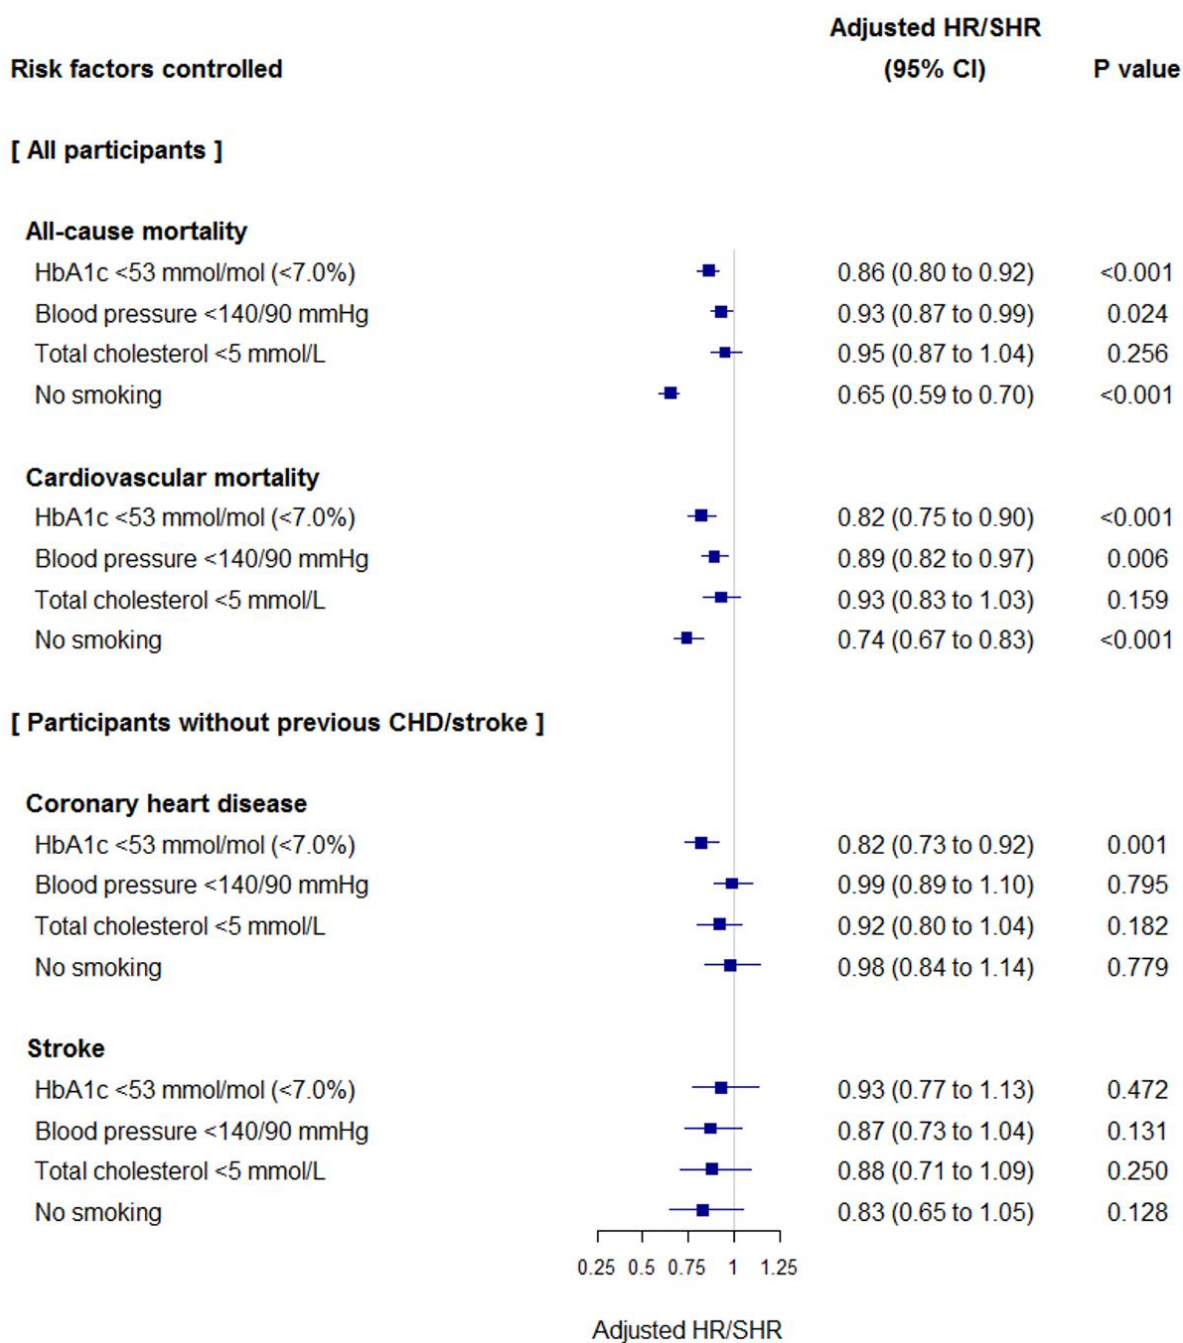

**(b) Non-CKD**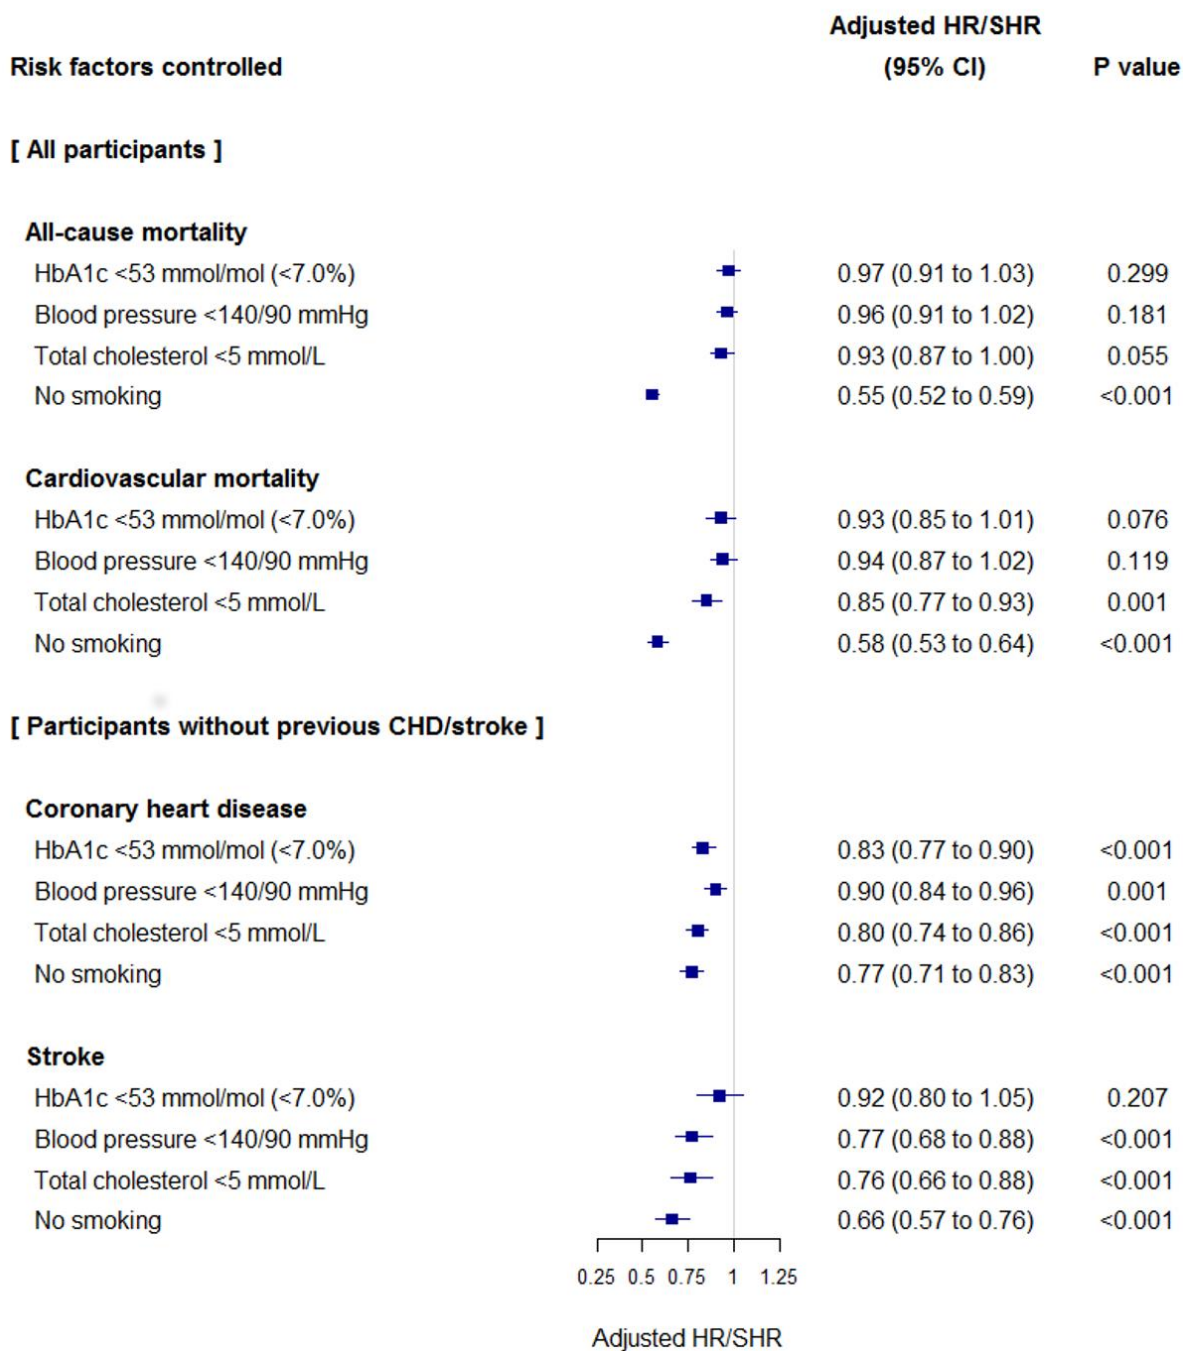

**STROBE 2007 (v4) Statement—Checklist of items that should be included in reports of *cohort studies***

| Section/Topic                | Item # | Recommendation                                                                                                                                                                       | Reported on page # |
|------------------------------|--------|--------------------------------------------------------------------------------------------------------------------------------------------------------------------------------------|--------------------|
| Title and abstract           | 1      | (a) Indicate the study's design with a commonly used term in the title or the abstract                                                                                               | 1,2                |
|                              |        | (b) Provide in the abstract an informative and balanced summary of what was done and what was found                                                                                  | 2,3                |
| <b>Introduction</b>          |        |                                                                                                                                                                                      |                    |
| Background/rationale         | 2      | Explain the scientific background and rationale for the investigation being reported                                                                                                 | 5,6                |
| Objectives                   | 3      | State specific objectives, including any prespecified hypotheses                                                                                                                     | 6                  |
| <b>Methods</b>               |        |                                                                                                                                                                                      |                    |
| Study design                 | 4      | Present key elements of study design early in the paper                                                                                                                              | 6,7                |
| Setting                      | 5      | Describe the setting, locations, and relevant dates, including periods of recruitment, exposure, follow-up, and data collection                                                      | 6,7                |
| Participants                 | 6      | (a) Give the eligibility criteria, and the sources and methods of selection of participants. Describe methods of follow-up                                                           | 7,8,10             |
|                              |        | (b) For matched studies, give matching criteria and number of exposed and unexposed                                                                                                  | NA                 |
| Variables                    | 7      | Clearly define all outcomes, exposures, predictors, potential confounders, and effect modifiers. Give diagnostic criteria, if applicable                                             | 9                  |
| Data sources/<br>measurement | 8*     | For each variable of interest, give sources of data and details of methods of assessment (measurement). Describe comparability of assessment methods if there is more than one group | 6-9                |
| Bias                         | 9      | Describe any efforts to address potential sources of bias                                                                                                                            | 10,11              |
| Study size                   | 10     | Explain how the study size was arrived at                                                                                                                                            | 6-8                |
| Quantitative variables       | 11     | Explain how quantitative variables were handled in the analyses. If applicable, describe which groupings were chosen and why                                                         | 11                 |
| Statistical methods          | 12     | (a) Describe all statistical methods, including those used to control for confounding                                                                                                | 11                 |
|                              |        | (b) Describe any methods used to examine subgroups and interactions                                                                                                                  | 11                 |
|                              |        | (c) Explain how missing data were addressed                                                                                                                                          | 8,11               |
|                              |        | (d) If applicable, explain how loss to follow-up was addressed                                                                                                                       | 10                 |
|                              |        | (e) Describe any sensitivity analyses                                                                                                                                                | NA                 |
| <b>Results</b>               |        |                                                                                                                                                                                      |                    |

|                          |     |                                                                                                                                                                                                              |                   |
|--------------------------|-----|--------------------------------------------------------------------------------------------------------------------------------------------------------------------------------------------------------------|-------------------|
| Participants             | 13* | (a) Report numbers of individuals at each stage of study—eg numbers potentially eligible, examined for eligibility, confirmed eligible, included in the study, completing follow-up, and analysed            | 12,Figure S1      |
|                          |     | (b) Give reasons for non-participation at each stage                                                                                                                                                         | 12,Figure S1      |
|                          |     | (c) Consider use of a flow diagram                                                                                                                                                                           | Figure S1         |
| Descriptive data         | 14* | (a) Give characteristics of study participants (eg demographic, clinical, social) and information on exposures and potential confounders                                                                     | 12,13,Table 1     |
|                          |     | (b) Indicate number of participants with missing data for each variable of interest                                                                                                                          | Table 1,Figure S1 |
|                          |     | (c) Summarise follow-up time (eg, average and total amount)                                                                                                                                                  | Figure 1          |
| Outcome data             | 15* | Report numbers of outcome events or summary measures over time                                                                                                                                               | Figure 1          |
| Main results             | 16  | (a) Give unadjusted estimates and, if applicable, confounder-adjusted estimates and their precision (eg, 95% confidence interval). Make clear which confounders were adjusted for and why they were included | 12-15             |
|                          |     | (b) Report category boundaries when continuous variables were categorized                                                                                                                                    | 9,11              |
|                          |     | (c) If relevant, consider translating estimates of relative risk into absolute risk for a meaningful time period                                                                                             | NA                |
| Other analyses           | 17  | Report other analyses done—eg analyses of subgroups and interactions, and sensitivity analyses                                                                                                               | NA                |
| <b>Discussion</b>        |     |                                                                                                                                                                                                              |                   |
| Key results              | 18  | Summarise key results with reference to study objectives                                                                                                                                                     | 15-16             |
| <b>Limitations</b>       |     |                                                                                                                                                                                                              |                   |
| Interpretation           | 20  | Give a cautious overall interpretation of results considering objectives, limitations, multiplicity of analyses, results from similar studies, and other relevant evidence                                   | 15-18             |
| Generalisability         | 21  | Discuss the generalisability (external validity) of the study results                                                                                                                                        | 17,18             |
| <b>Other information</b> |     |                                                                                                                                                                                                              |                   |
| Funding                  | 22  | Give the source of funding and the role of the funders for the present study and, if applicable, for the original study on which the present article is based                                                | 19                |

\*Give information separately for cases and controls in case-control studies and, if applicable, for exposed and unexposed groups in cohort and cross-sectional studies.

**Note:** An Explanation and Elaboration article discusses each checklist item and gives methodological background and published examples of transparent reporting. The STROBE checklist is best used in conjunction with this article (freely available on the Web sites of PLoS Medicine at <http://www.plosmedicine.org/>, Annals of Internal Medicine at <http://www.annals.org/>, and Epidemiology at <http://www.epidem.com/>). Information on the STROBE Initiative is available at [www.strobe-statement.org](http://www.strobe-statement.org).
